# Supplementary material
Source: publisher figshare collection journal article supplement (https://acs.figshare.com/ndownloader/files/5304622)
Supplement: Supplementary file 1 [file 5304622]

ATOM      1  N   ARG B   2     116.134  82.646  17.939  1.00 83.07           N  
ATOM      2  CA  ARG B   2     116.527  81.952  19.182  1.00 83.07           C  
ATOM      3  C   ARG B   2     115.851  80.565  19.366  1.00 83.07           C  
ATOM      4  O   ARG B   2     116.397  79.760  20.101  1.00 83.07           O  
ATOM      5  CB  ARG B   2     116.326  82.876  20.407  1.00 83.07           C  
ATOM      6  CG  ARG B   2     116.339  84.389  20.123  1.00 83.07           C  
ATOM      7  CD  ARG B   2     115.047  85.082  20.542  1.00 83.07           C  
ATOM      8  NE  ARG B   2     114.753  86.301  19.774  1.00 83.07           N  
ATOM      9  CZ  ARG B   2     113.515  86.764  19.471  1.00 83.07           C  
ATOM     10  NH1 ARG B   2     112.429  86.102  19.864  1.00 83.07           N1+
ATOM     11  NH2 ARG B   2     113.358  87.900  18.773  1.00 83.07           N  
ATOM     12  N   GLU B   3     114.727  80.267  18.680  1.00 83.07           N  
ATOM     13  CA  GLU B   3     113.955  78.995  18.855  1.00 83.07           C  
ATOM     14  C   GLU B   3     112.456  79.096  18.486  1.00 83.07           C  
ATOM     15  O   GLU B   3     111.726  79.799  19.183  1.00 83.07           O  
ATOM     16  CB  GLU B   3     113.951  78.616  20.330  1.00 83.07           C  
ATOM     17  CG  GLU B   3     114.392  77.216  20.663  1.00 83.07           C  
ATOM     18  CD  GLU B   3     114.546  77.009  22.164  1.00 83.07           C  
ATOM     19  OE1 GLU B   3     113.996  76.009  22.666  1.00 83.07           O  
ATOM     20  OE2 GLU B   3     115.214  77.828  22.854  1.00 83.07           O1-
ATOM     21  N   ILE B   4     111.958  78.363  17.482  1.00 83.07           N  
ATOM     22  CA  ILE B   4     110.530  78.507  17.087  1.00 83.07           C  
ATOM     23  C   ILE B   4     109.657  77.248  17.070  1.00 83.07           C  
ATOM     24  O   ILE B   4     110.132  76.196  16.668  1.00 83.07           O  
ATOM     25  CB  ILE B   4     110.391  79.201  15.709  1.00 83.07           C  
ATOM     26  CG1 ILE B   4     109.928  78.220  14.642  1.00 83.07           C  
ATOM     27  CG2 ILE B   4     111.688  79.840  15.260  1.00 83.07           C  
ATOM     28  CD1 ILE B   4     109.915  78.824  13.279  1.00 83.07           C  
ATOM     29  N   VAL B   5     108.381  77.370  17.482  1.00 83.07           N  
ATOM     30  CA  VAL B   5     107.414  76.244  17.457  1.00 83.07           C  
ATOM     31  C   VAL B   5     106.579  76.343  16.202  1.00 83.07           C  
ATOM     32  O   VAL B   5     106.335  77.440  15.681  1.00 83.07           O  
ATOM     33  CB  VAL B   5     106.450  76.140  18.667  1.00 83.07           C  
ATOM     34  CG1 VAL B   5     107.084  76.626  19.928  1.00 83.07           C  
ATOM     35  CG2 VAL B   5     105.177  76.873  18.402  1.00 83.07           C  
ATOM     36  N   HIS B   6     106.106  75.194  15.747  1.00 83.07           N  
ATOM     37  CA  HIS B   6     105.413  75.135  14.490  1.00 83.07           C  
ATOM     38  C   HIS B   6     104.065  74.469  14.556  1.00 83.07           C  
ATOM     39  O   HIS B   6     103.976  73.250  14.671  1.00 83.07           O  
ATOM     40  CB  HIS B   6     106.302  74.405  13.492  1.00 83.07           C  
ATOM     41  CG  HIS B   6     105.664  74.215  12.160  1.00 83.07           C  
ATOM     42  CD2 HIS B   6     105.312  75.110  11.203  1.00 83.07           C  
ATOM     43  ND1 HIS B   6     105.279  72.977  11.694  1.00 83.07           N  
ATOM     44  CE1 HIS B   6     104.723  73.117  10.500  1.00 83.07           C  
ATOM     45  NE2 HIS B   6     104.731  74.401  10.179  1.00 83.07           N  
ATOM     46  N   ILE B   7     103.017  75.280  14.474  1.00 83.07           N  
ATOM     47  CA  ILE B   7     101.641  74.779  14.431  1.00 83.07           C  
ATOM     48  C   ILE B   7     101.290  74.489  12.965  1.00 83.07           C  
ATOM     49  O   ILE B   7     101.640  75.257  12.072  1.00 83.07           O  
ATOM     50  CB  ILE B   7     100.656  75.797  15.062  1.00 83.07           C  
ATOM     51  CG1 ILE B   7     100.759  75.774  16.588  1.00 83.07           C  
ATOM     52  CG2 ILE B   7      99.230  75.515  14.638  1.00 83.07           C  
ATOM     53  CD1 ILE B   7     100.088  76.950  17.265  1.00 83.07           C  
ATOM     54  N   GLN B   8     100.596  73.386  12.723  1.00 83.07           N  
ATOM     55  CA  GLN B   8     100.252  72.973  11.373  1.00 83.07           C  
ATOM     56  C   GLN B   8      98.825  72.383  11.380  1.00 83.07           C  
ATOM     57  O   GLN B   8      98.636  71.258  11.851  1.00 83.07           O  
ATOM     58  CB  GLN B   8     101.304  71.959  10.966  1.00 83.07           C  
ATOM     59  CG  GLN B   8     101.166  71.384   9.617  1.00 83.07           C  
ATOM     60  CD  GLN B   8     102.031  70.172   9.470  1.00 83.07           C  
ATOM     61  NE2 GLN B   8     103.339  70.383   9.472  1.00 83.07           N  
ATOM     62  OE1 GLN B   8     101.532  69.050   9.377  1.00 83.07           O  
ATOM     63  N   ALA B   9      97.838  73.129  10.856  1.00 83.07           N  
ATOM     64  CA  ALA B   9      96.427  72.738  10.978  1.00 83.07           C  
ATOM     65  C   ALA B   9      95.553  72.748   9.738  1.00 83.07           C  
ATOM     66  O   ALA B   9      95.614  73.671   8.947  1.00 83.07           O  
ATOM     67  CB  ALA B   9      95.762  73.591  12.037  1.00 83.07           C  
ATOM     68  N   GLY B  10      94.700  71.731   9.612  1.00 83.07           N  
ATOM     69  CA  GLY B  10      93.729  71.629   8.529  1.00 83.07           C  
ATOM     70  C   GLY B  10      94.256  71.001   7.264  1.00 83.07           C  
ATOM     71  O   GLY B  10      95.210  71.513   6.711  1.00 83.07           O  
ATOM     72  N   GLN B  11      93.598  69.939   6.788  1.00 83.07           N  
ATOM     73  CA  GLN B  11      94.009  69.144   5.600  1.00 83.07           C  
ATOM     74  C   GLN B  11      95.096  69.717   4.694  1.00 83.07           C  
ATOM     75  O   GLN B  11      96.091  69.043   4.422  1.00 83.07           O  
ATOM     76  CB  GLN B  11      92.814  68.696   4.739  1.00 83.07           C  
ATOM     77  CG  GLN B  11      93.127  67.469   3.825  1.00 83.07           C  
ATOM     78  CD  GLN B  11      92.808  67.678   2.315  1.00 83.07           C  
ATOM     79  NE2 GLN B  11      93.793  67.378   1.459  1.00 83.07           N  
ATOM     80  OE1 GLN B  11      91.686  68.078   1.934  1.00 83.07           O  
ATOM     81  N   CYS B  12      94.891  70.936   4.201  1.00 83.07           N  
ATOM     82  CA  CYS B  12      95.887  71.584   3.352  1.00 83.07           C  
ATOM     83  C   CYS B  12      97.138  71.840   4.171  1.00 83.07           C  
ATOM     84  O   CYS B  12      98.194  71.296   3.876  1.00 83.07           O  
ATOM     85  CB  CYS B  12      95.361  72.893   2.771  1.00 83.07           C  
ATOM     86  SG  CYS B  12      96.676  73.940   2.112  1.00 83.07           S  
ATOM     87  N   GLY B  13      97.006  72.664   5.204  1.00 83.07           N  
ATOM     88  CA  GLY B  13      98.107  72.930   6.099  1.00 83.07           C  
ATOM     89  C   GLY B  13      98.865  71.656   6.426  1.00 83.07           C  
ATOM     90  O   GLY B  13     100.050  71.569   6.154  1.00 83.07           O  
ATOM     91  N   ASN B  14      98.185  70.655   6.973  1.00 83.07           N  
ATOM     92  CA  ASN B  14      98.845  69.403   7.338  1.00 83.07           C  
ATOM     93  C   ASN B  14      99.629  68.742   6.221  1.00 83.07           C  
ATOM     94  O   ASN B  14     100.747  68.296   6.436  1.00 83.07           O  
ATOM     95  CB  ASN B  14      97.858  68.414   7.941  1.00 83.07           C  
ATOM     96  CG  ASN B  14      97.597  68.691   9.391  1.00 83.07           C  
ATOM     97  ND2 ASN B  14      98.146  67.860  10.271  1.00 83.07           N  
ATOM     98  OD1 ASN B  14      96.923  69.665   9.723  1.00 83.07           O  
ATOM     99  N   GLN B  15      99.035  68.675   5.039  1.00 83.07           N  
ATOM    100  CA  GLN B  15      99.693  68.109   3.872  1.00 83.07           C  
ATOM    101  C   GLN B  15     100.913  68.969   3.459  1.00 83.07           C  
ATOM    102  O   GLN B  15     102.014  68.452   3.226  1.00 83.07           O  
ATOM    103  CB  GLN B  15      98.684  68.010   2.728  1.00 83.07           C  
ATOM    104  CG  GLN B  15      99.176  67.255   1.528  1.00 83.07           C  
ATOM    105  CD  GLN B  15      98.985  65.767   1.667  1.00 83.07           C  
ATOM    106  NE2 GLN B  15      99.853  64.996   1.013  1.00 83.07           N  
ATOM    107  OE1 GLN B  15      98.068  65.313   2.356  1.00 83.07           O  
ATOM    108  N   ILE B  16     100.700  70.283   3.386  1.00 83.07           N  
ATOM    109  CA  ILE B  16     101.733  71.241   3.004  1.00 83.07           C  
ATOM    110  C   ILE B  16     102.929  71.133   3.910  1.00 83.07           C  
ATOM    111  O   ILE B  16     104.043  70.989   3.439  1.00 83.07           O  
ATOM    112  CB  ILE B  16     101.164  72.678   3.016  1.00 83.07           C  
ATOM    113  CG1 ILE B  16     101.272  73.279   1.632  1.00 83.07           C  
ATOM    114  CG2 ILE B  16     101.866  73.591   4.026  1.00 83.07           C  
ATOM    115  CD1 ILE B  16     100.306  74.401   1.422  1.00 83.07           C  
ATOM    116  N   GLY B  17     102.674  71.181   5.212  1.00 83.07           N  
ATOM    117  CA  GLY B  17     103.714  71.147   6.220  1.00 83.07           C  
ATOM    118  C   GLY B  17     104.430  69.826   6.283  1.00 83.07           C  
ATOM    119  O   GLY B  17     105.629  69.785   6.542  1.00 83.07           O  
ATOM    120  N   ALA B  18     103.692  68.746   6.047  1.00 83.07           N  
ATOM    121  CA  ALA B  18     104.269  67.411   6.071  1.00 83.07           C  
ATOM    122  C   ALA B  18     105.405  67.356   5.071  1.00 83.07           C  
ATOM    123  O   ALA B  18     106.465  66.823   5.373  1.00 83.07           O  
ATOM    124  CB  ALA B  18     103.222  66.347   5.764  1.00 83.07           C  
ATOM    125  N   LYS B  19     105.198  67.927   3.889  1.00 83.07           N  
ATOM    126  CA  LYS B  19     106.251  67.935   2.886  1.00 83.07           C  
ATOM    127  C   LYS B  19     107.361  68.863   3.357  1.00 83.07           C  
ATOM    128  O   LYS B  19     108.525  68.559   3.168  1.00 83.07           O  
ATOM    129  CB  LYS B  19     105.737  68.317   1.487  1.00 83.07           C  
ATOM    130  CG  LYS B  19     104.631  67.418   0.905  1.00 83.07           C  
ATOM    131  CD  LYS B  19     105.129  66.047   0.493  1.00 83.07           C  
ATOM    132  CE  LYS B  19     104.122  64.989   0.894  1.00 83.07           C  
ATOM    133  NZ  LYS B  19     104.219  63.848  -0.027  1.00 83.07           N1+
ATOM    134  N   PHE B  20     107.004  69.976   3.995  1.00 83.07           N  
ATOM    135  CA  PHE B  20     108.003  70.902   4.509  1.00 83.07           C  
ATOM    136  C   PHE B  20     108.928  70.118   5.417  1.00 83.07           C  
ATOM    137  O   PHE B  20     110.128  70.060   5.186  1.00 83.07           O  
ATOM    138  CB  PHE B  20     107.346  72.058   5.270  1.00 83.07           C  
ATOM    139  CG  PHE B  20     108.278  72.792   6.208  1.00 83.07           C  
ATOM    140  CD1 PHE B  20     108.449  72.381   7.526  1.00 83.07           C  
ATOM    141  CD2 PHE B  20     108.965  73.910   5.789  1.00 83.07           C  
ATOM    142  CE1 PHE B  20     109.307  73.064   8.401  1.00 83.07           C  
ATOM    143  CE2 PHE B  20     109.824  74.593   6.666  1.00 83.07           C  
ATOM    144  CZ  PHE B  20     109.987  74.163   7.969  1.00 83.07           C  
ATOM    145  N   TRP B  21     108.342  69.471   6.419  1.00 83.07           N  
ATOM    146  CA  TRP B  21     109.090  68.708   7.416  1.00 83.07           C  
ATOM    147  C   TRP B  21     110.059  67.698   6.840  1.00 83.07           C  
ATOM    148  O   TRP B  21     111.257  67.795   7.078  1.00 83.07           O  
ATOM    149  CB  TRP B  21     108.147  68.072   8.430  1.00 83.07           C  
ATOM    150  CG  TRP B  21     107.779  69.054   9.458  1.00 83.07           C  
ATOM    151  CD1 TRP B  21     106.567  69.644   9.633  1.00 83.07           C  
ATOM    152  CD2 TRP B  21     108.646  69.615  10.440  1.00 83.07           C  
ATOM    153  CE2 TRP B  21     107.889  70.529  11.194  1.00 83.07           C  
ATOM    154  CE3 TRP B  21     109.995  69.432  10.767  1.00 83.07           C  
ATOM    155  NE1 TRP B  21     106.620  70.528  10.681  1.00 83.07           N  
ATOM    156  CZ2 TRP B  21     108.429  71.248  12.250  1.00 83.07           C  
ATOM    157  CZ3 TRP B  21     110.529  70.149  11.805  1.00 83.07           C  
ATOM    158  CH2 TRP B  21     109.750  71.044  12.539  1.00 83.07           C  
ATOM    159  N   GLU B  22     109.549  66.753   6.061  1.00 83.07           N  
ATOM    160  CA  GLU B  22     110.399  65.741   5.446  1.00 83.07           C  
ATOM    161  C   GLU B  22     111.421  66.348   4.483  1.00 83.07           C  
ATOM    162  O   GLU B  22     112.406  65.702   4.146  1.00 83.07           O  
ATOM    163  CB  GLU B  22     109.560  64.644   4.768  1.00 83.07           C  
ATOM    164  CG  GLU B  22     109.384  64.786   3.261  1.00 83.07           C  
ATOM    165  CD  GLU B  22     108.313  63.868   2.699  1.00 83.07           C  
ATOM    166  OE1 GLU B  22     107.107  64.209   2.777  1.00 83.07           O  
ATOM    167  OE2 GLU B  22     108.682  62.800   2.169  1.00 83.07           O1-
ATOM    168  N   VAL B  23     111.199  67.588   4.059  1.00 83.07           N  
ATOM    169  CA  VAL B  23     112.123  68.232   3.133  1.00 83.07           C  
ATOM    170  C   VAL B  23     113.307  68.859   3.862  1.00 83.07           C  
ATOM    171  O   VAL B  23     114.441  68.790   3.379  1.00 83.07           O  
ATOM    172  CB  VAL B  23     111.399  69.202   2.169  1.00 83.07           C  
ATOM    173  CG1 VAL B  23     112.154  70.501   2.003  1.00 83.07           C  
ATOM    174  CG2 VAL B  23     111.179  68.526   0.812  1.00 83.07           C  
ATOM    175  N   ILE B  24     113.045  69.461   5.021  1.00 83.07           N  
ATOM    176  CA  ILE B  24     114.114  70.064   5.807  1.00 83.07           C  
ATOM    177  C   ILE B  24     114.839  68.985   6.590  1.00 83.07           C  
ATOM    178  O   ILE B  24     116.032  69.097   6.864  1.00 83.07           O  
ATOM    179  CB  ILE B  24     113.607  71.183   6.749  1.00 83.07           C  
ATOM    180  CG1 ILE B  24     113.190  70.627   8.105  1.00 83.07           C  
ATOM    181  CG2 ILE B  24     112.454  71.911   6.150  1.00 83.07           C  
ATOM    182  CD1 ILE B  24     113.156  71.664   9.205  1.00 83.07           C  
ATOM    183  N   SER B  25     114.115  67.931   6.943  1.00 83.07           N  
ATOM    184  CA  SER B  25     114.702  66.848   7.714  1.00 83.07           C  
ATOM    185  C   SER B  25     115.799  66.141   6.950  1.00 83.07           C  
ATOM    186  O   SER B  25     116.796  65.730   7.531  1.00 83.07           O  
ATOM    187  CB  SER B  25     113.640  65.861   8.146  1.00 83.07           C  
ATOM    188  OG  SER B  25     113.021  66.333   9.319  1.00 83.07           O  
ATOM    189  N   ASP B  26     115.620  66.002   5.646  1.00 83.07           N  
ATOM    190  CA  ASP B  26     116.634  65.365   4.833  1.00 83.07           C  
ATOM    191  C   ASP B  26     117.741  66.386   4.491  1.00 83.07           C  
ATOM    192  O   ASP B  26     118.836  66.015   4.054  1.00 83.07           O  
ATOM    193  CB  ASP B  26     116.002  64.705   3.604  1.00 83.07           C  
ATOM    194  CG  ASP B  26     116.812  64.919   2.347  1.00 83.07           C  
ATOM    195  OD1 ASP B  26     116.667  66.002   1.738  1.00 83.07           O  
ATOM    196  OD2 ASP B  26     117.628  64.077   1.900  1.00 83.07           O1-
ATOM    197  N   GLU B  27     117.455  67.671   4.697  1.00 83.07           N  
ATOM    198  CA  GLU B  27     118.449  68.723   4.470  1.00 83.07           C  
ATOM    199  C   GLU B  27     119.447  68.636   5.596  1.00 83.07           C  
ATOM    200  O   GLU B  27     120.652  68.723   5.381  1.00 83.07           O  
ATOM    201  CB  GLU B  27     117.803  70.105   4.488  1.00 83.07           C  
ATOM    202  CG  GLU B  27     118.325  71.051   3.433  1.00 83.07           C  
ATOM    203  CD  GLU B  27     117.209  71.844   2.802  1.00 83.07           C  
ATOM    204  OE1 GLU B  27     116.649  71.403   1.766  1.00 83.07           O  
ATOM    205  OE2 GLU B  27     116.883  72.906   3.366  1.00 83.07           O1-
ATOM    206  N   HIS B  28     118.906  68.447   6.798  1.00 83.07           N  
ATOM    207  CA  HIS B  28     119.667  68.319   8.029  1.00 83.07           C  
ATOM    208  C   HIS B  28     120.197  66.908   8.249  1.00 83.07           C  
ATOM    209  O   HIS B  28     121.047  66.701   9.113  1.00 83.07           O  
ATOM    210  CB  HIS B  28     118.769  68.656   9.202  1.00 83.07           C  
ATOM    211  CG  HIS B  28     118.458  70.104   9.326  1.00 83.07           C  
ATOM    212  CD2 HIS B  28     117.300  70.782   9.172  1.00 83.07           C  
ATOM    213  ND1 HIS B  28     119.407  71.033   9.677  1.00 83.07           N  
ATOM    214  CE1 HIS B  28     118.848  72.228   9.723  1.00 83.07           C  
ATOM    215  NE2 HIS B  28     117.569  72.103   9.422  1.00 83.07           N  
ATOM    216  N   GLY B  29     119.665  65.940   7.502  1.00 83.07           N  
ATOM    217  CA  GLY B  29     120.083  64.548   7.605  1.00 83.07           C  
ATOM    218  C   GLY B  29     119.483  63.836   8.795  1.00 83.07           C  
ATOM    219  O   GLY B  29     120.198  63.428   9.704  1.00 83.07           O  
ATOM    220  N   ILE B  30     118.164  63.691   8.776  1.00 83.07           N  
ATOM    221  CA  ILE B  30     117.435  63.052   9.857  1.00 83.07           C  
ATOM    222  C   ILE B  30     116.556  61.932   9.318  1.00 83.07           C  
ATOM    223  O   ILE B  30     115.863  62.090   8.315  1.00 83.07           O  
ATOM    224  CB  ILE B  30     116.626  64.107  10.653  1.00 83.07           C  
ATOM    225  CG1 ILE B  30     117.487  64.715  11.752  1.00 83.07           C  
ATOM    226  CG2 ILE B  30     115.426  63.504  11.320  1.00 83.07           C  
ATOM    227  CD1 ILE B  30     118.326  65.862  11.308  1.00 83.07           C  
ATOM    228  N   ASP B  31     116.613  60.797  10.003  1.00 83.07           N  
ATOM    229  CA  ASP B  31     115.868  59.600   9.652  1.00 83.07           C  
ATOM    230  C   ASP B  31     114.430  59.695  10.084  1.00 83.07           C  
ATOM    231  O   ASP B  31     114.103  60.553  10.894  1.00 83.07           O  
ATOM    232  CB  ASP B  31     116.484  58.419  10.390  1.00 83.07           C  
ATOM    233  CG  ASP B  31     117.107  57.413   9.457  1.00 83.07           C  
ATOM    234  OD1 ASP B  31     117.353  57.770   8.281  1.00 83.07           O  
ATOM    235  OD2 ASP B  31     117.385  56.243   9.813  1.00 83.07           O1-
ATOM    236  N   PRO B  32     113.570  58.812   9.567  1.00 83.07           N  
ATOM    237  CA  PRO B  32     112.169  58.777   9.994  1.00 83.07           C  
ATOM    238  C   PRO B  32     112.029  58.940  11.514  1.00 83.07           C  
ATOM    239  O   PRO B  32     111.008  59.450  11.983  1.00 83.07           O  
ATOM    240  CB  PRO B  32     111.707  57.392   9.538  1.00 83.07           C  
ATOM    241  CG  PRO B  32     112.516  57.116   8.317  1.00 83.07           C  
ATOM    242  CD  PRO B  32     113.837  57.807   8.521  1.00 83.07           C  
ATOM    243  N   THR B  33     113.045  58.507  12.261  1.00 83.07           N  
ATOM    244  CA  THR B  33     113.090  58.676  13.714  1.00 83.07           C  
ATOM    245  C   THR B  33     114.517  59.034  14.056  1.00 83.07           C  
ATOM    246  O   THR B  33     114.798  60.116  14.595  1.00 83.07           O  
ATOM    247  CB  THR B  33     112.673  57.391  14.493  1.00 83.07           C  
ATOM    248  CG2 THR B  33     111.528  57.683  15.470  1.00 83.07           C  
ATOM    249  OG1 THR B  33     112.108  56.425  13.599  1.00 83.07           O  
ATOM    250  N   GLY B  34     115.411  58.109  13.711  1.00 83.07           N  
ATOM    251  CA  GLY B  34     116.827  58.257  13.946  1.00 83.07           C  
ATOM    252  C   GLY B  34     117.322  59.677  13.778  1.00 83.07           C  
ATOM    253  O   GLY B  34     116.611  60.584  13.323  1.00 83.07           O  
ATOM    254  N   SER B  35     118.571  59.861  14.166  1.00 83.07           N  
ATOM    255  CA  SER B  35     119.210  61.156  14.095  1.00 83.07           C  
ATOM    256  C   SER B  35     120.016  61.312  12.811  1.00 83.07           C  
ATOM    257  O   SER B  35     119.658  60.788  11.749  1.00 83.07           O  
ATOM    258  CB  SER B  35     120.101  61.387  15.331  1.00 83.07           C  
ATOM    259  OG  SER B  35     121.310  60.632  15.275  1.00 83.07           O  
ATOM    260  N   TYR B  36     121.113  62.038  12.952  1.00 83.07           N  
ATOM    261  CA  TYR B  36     122.022  62.365  11.889  1.00 83.07           C  
ATOM    262  C   TYR B  36     122.569  61.153  11.113  1.00 83.07           C  
ATOM    263  O   TYR B  36     122.650  60.035  11.629  1.00 83.07           O  
ATOM    264  CB  TYR B  36     123.135  63.191  12.512  1.00 83.07           C  
ATOM    265  CG  TYR B  36     123.854  64.105  11.578  1.00 83.07           C  
ATOM    266  CD1 TYR B  36     123.464  64.233  10.251  1.00 83.07           C  
ATOM    267  CD2 TYR B  36     124.954  64.831  12.023  1.00 83.07           C  
ATOM    268  CE1 TYR B  36     124.151  65.050   9.394  1.00 83.07           C  
ATOM    269  CE2 TYR B  36     125.646  65.664  11.176  1.00 83.07           C  
ATOM    270  CZ  TYR B  36     125.237  65.771   9.864  1.00 83.07           C  
ATOM    271  OH  TYR B  36     125.915  66.601   9.020  1.00 83.07           O  
ATOM    272  N   HIS B  37     122.897  61.413   9.849  1.00 83.07           N  
ATOM    273  CA  HIS B  37     123.486  60.470   8.896  1.00 83.07           C  
ATOM    274  C   HIS B  37     123.716  61.317   7.641  1.00 83.07           C  
ATOM    275  O   HIS B  37     122.763  61.714   6.962  1.00 83.07           O  
ATOM    276  CB  HIS B  37     122.553  59.278   8.611  1.00 83.07           C  
ATOM    277  N   GLY B  38     124.977  61.637   7.366  1.00 83.07           N  
ATOM    278  CA  GLY B  38     125.331  62.483   6.236  1.00 83.07           C  
ATOM    279  C   GLY B  38     126.602  63.234   6.569  1.00 83.07           C  
ATOM    280  O   GLY B  38     126.645  63.962   7.568  1.00 83.07           O  
ATOM    281  N   ASP B  39     127.618  63.059   5.718  1.00 83.07           N  
ATOM    282  CA  ASP B  39     128.963  63.640   5.905  1.00 83.07           C  
ATOM    283  C   ASP B  39     129.065  65.166   6.131  1.00 83.07           C  
ATOM    284  O   ASP B  39     130.179  65.692   6.305  1.00 83.07           O  
ATOM    285  CB  ASP B  39     129.919  63.184   4.782  1.00 83.07           C  
ATOM    286  CG  ASP B  39     131.092  62.352   5.303  1.00 83.07           C  
ATOM    287  OD1 ASP B  39     130.846  61.323   5.971  1.00 83.07           O  
ATOM    288  OD2 ASP B  39     132.291  62.646   5.092  1.00 83.07           O1-
ATOM    289  N   SER B  40     127.918  65.859   6.129  1.00 83.07           N  
ATOM    290  CA  SER B  40     127.861  67.305   6.404  1.00 83.07           C  
ATOM    291  C   SER B  40     128.019  67.538   7.932  1.00 83.07           C  
ATOM    292  O   SER B  40     127.858  66.598   8.729  1.00 83.07           O  
ATOM    293  CB  SER B  40     126.573  67.930   5.838  1.00 83.07           C  
ATOM    294  OG  SER B  40     126.762  68.533   4.559  1.00 83.07           O  
ATOM    295  N   ASP B  41     128.340  68.765   8.344  1.00 83.07           N  
ATOM    296  CA  ASP B  41     128.605  69.037   9.759  1.00 83.07           C  
ATOM    297  C   ASP B  41     127.816  70.202  10.275  1.00 83.07           C  
ATOM    298  O   ASP B  41     127.380  70.203  11.423  1.00 83.07           O  
ATOM    299  CB  ASP B  41     130.103  69.315   9.977  1.00 83.07           C  
ATOM    300  CG  ASP B  41     130.597  68.845  11.342  1.00 83.07           C  
ATOM    301  OD1 ASP B  41     129.741  68.537  12.212  1.00 83.07           O  
ATOM    302  OD2 ASP B  41     131.818  68.755  11.628  1.00 83.07           O1-
ATOM    303  N   LEU B  42     127.680  71.203   9.417  1.00 83.07           N  
ATOM    304  CA  LEU B  42     126.947  72.408   9.732  1.00 83.07           C  
ATOM    305  C   LEU B  42     125.605  72.049  10.340  1.00 83.07           C  
ATOM    306  O   LEU B  42     125.466  72.024  11.562  1.00 83.07           O  
ATOM    307  CB  LEU B  42     126.754  73.241   8.466  1.00 83.07           C  
ATOM    308  CG  LEU B  42     127.701  74.425   8.251  1.00 83.07           C  
ATOM    309  CD1 LEU B  42     127.070  75.703   8.836  1.00 83.07           C  
ATOM    310  CD2 LEU B  42     129.146  74.172   8.782  1.00 83.07           C  
ATOM    311  N   GLN B  43     124.638  71.752   9.470  1.00 83.07           N  
ATOM    312  CA  GLN B  43     123.262  71.351   9.823  1.00 83.07           C  
ATOM    313  C   GLN B  43     122.866  71.569  11.269  1.00 83.07           C  
ATOM    314  O   GLN B  43     121.971  72.359  11.572  1.00 83.07           O  
ATOM    315  CB  GLN B  43     122.996  69.879   9.459  1.00 83.07           C  
ATOM    316  CG  GLN B  43     124.182  69.160   8.843  1.00 83.07           C  
ATOM    317  CD  GLN B  43     123.813  68.363   7.599  1.00 83.07           C  
ATOM    318  NE2 GLN B  43     123.835  69.014   6.436  1.00 83.07           N  
ATOM    319  OE1 GLN B  43     123.529  67.171   7.686  1.00 83.07           O  
ATOM    320  N   LEU B  44     123.568  70.872  12.148  1.00 83.07           N  
ATOM    321  CA  LEU B  44     123.283  70.879  13.570  1.00 83.07           C  
ATOM    322  C   LEU B  44     123.353  72.199  14.348  1.00 83.07           C  
ATOM    323  O   LEU B  44     122.662  72.308  15.360  1.00 83.07           O  
ATOM    324  CB  LEU B  44     124.078  69.775  14.278  1.00 83.07           C  
ATOM    325  CG  LEU B  44     124.070  68.349  13.696  1.00 83.07           C  
ATOM    326  CD1 LEU B  44     125.101  67.509  14.446  1.00 83.07           C  
ATOM    327  CD2 LEU B  44     122.707  67.670  13.724  1.00 83.07           C  
TER     328      LEU B  44 
ATOM    329  N   GLU B  47     124.139  73.194  13.924  1.00 83.07           N  
ATOM    330  CA  GLU B  47     124.185  74.476  14.659  1.00 83.07           C  
ATOM    331  C   GLU B  47     122.796  74.893  15.105  1.00 83.07           C  
ATOM    332  O   GLU B  47     122.390  74.733  16.259  1.00 83.07           O  
ATOM    333  CB  GLU B  47     124.702  75.633  13.796  1.00 83.07           C  
ATOM    334  CG  GLU B  47     125.943  75.352  12.974  1.00 83.07           C  
ATOM    335  CD  GLU B  47     127.230  75.634  13.737  1.00 83.07           C  
ATOM    336  OE1 GLU B  47     128.163  76.220  13.134  1.00 83.07           O  
ATOM    337  OE2 GLU B  47     127.319  75.261  14.936  1.00 83.07           O1-
ATOM    338  N   ARG B  48     122.051  75.418  14.155  1.00 83.07           N  
ATOM    339  CA  ARG B  48     120.735  75.902  14.462  1.00 83.07           C  
ATOM    340  C   ARG B  48     119.616  74.848  14.275  1.00 83.07           C  
ATOM    341  O   ARG B  48     118.472  75.201  13.953  1.00 83.07           O  
ATOM    342  CB  ARG B  48     120.493  77.205  13.686  1.00 83.07           C  
ATOM    343  CG  ARG B  48     121.428  78.368  14.088  1.00 83.07           C  
ATOM    344  CD  ARG B  48     120.960  79.755  13.600  1.00 83.07           C  
ATOM    345  NE  ARG B  48     122.087  80.676  13.342  1.00 83.07           N  
ATOM    346  CZ  ARG B  48     122.546  81.050  12.114  1.00 83.07           C  
ATOM    347  NH1 ARG B  48     121.978  80.586  11.001  1.00 83.07           N1+
ATOM    348  NH2 ARG B  48     123.574  81.901  11.997  1.00 83.07           N  
ATOM    349  N   ILE B  49     119.929  73.563  14.495  1.00 83.07           N  
ATOM    350  CA  ILE B  49     118.907  72.494  14.395  1.00 83.07           C  
ATOM    351  C   ILE B  49     117.929  72.673  15.553  1.00 83.07           C  
ATOM    352  O   ILE B  49     116.779  72.234  15.537  1.00 83.07           O  
ATOM    353  CB  ILE B  49     119.540  71.085  14.397  1.00 83.07           C  
ATOM    354  CG1 ILE B  49     118.486  70.039  14.048  1.00 83.07           C  
ATOM    355  CG2 ILE B  49     120.166  70.757  15.738  1.00 83.07           C  
ATOM    356  CD1 ILE B  49     118.696  69.404  12.717  1.00 83.07           C  
ATOM    357  N   ASN B  50     118.470  73.326  16.566  1.00 83.07           N  
ATOM    358  CA  ASN B  50     117.783  73.784  17.731  1.00 83.07           C  
ATOM    359  C   ASN B  50     116.458  74.420  17.327  1.00 83.07           C  
ATOM    360  O   ASN B  50     115.402  73.977  17.737  1.00 83.07           O  
ATOM    361  CB  ASN B  50     118.690  74.873  18.309  1.00 83.07           C  
ATOM    362  CG  ASN B  50     118.596  74.995  19.800  1.00 83.07           C  
ATOM    363  ND2 ASN B  50     118.714  76.222  20.295  1.00 83.07           N  
ATOM    364  OD1 ASN B  50     118.444  74.004  20.510  1.00 83.07           O  
ATOM    365  N   VAL B  51     116.548  75.440  16.473  1.00 83.07           N  
ATOM    366  CA  VAL B  51     115.440  76.287  16.025  1.00 83.07           C  
ATOM    367  C   VAL B  51     114.184  75.577  15.608  1.00 83.07           C  
ATOM    368  O   VAL B  51     113.103  76.008  15.966  1.00 83.07           O  
ATOM    369  CB  VAL B  51     115.868  77.203  14.870  1.00 83.07           C  
ATOM    370  CG1 VAL B  51     114.701  77.989  14.374  1.00 83.07           C  
ATOM    371  CG2 VAL B  51     116.938  78.152  15.319  1.00 83.07           C  
ATOM    372  N   TYR B  52     114.326  74.508  14.837  1.00 83.07           N  
ATOM    373  CA  TYR B  52     113.173  73.750  14.367  1.00 83.07           C  
ATOM    374  C   TYR B  52     112.995  72.358  14.981  1.00 83.07           C  
ATOM    375  O   TYR B  52     112.087  71.630  14.583  1.00 83.07           O  
ATOM    376  CB  TYR B  52     113.210  73.619  12.857  1.00 83.07           C  
ATOM    377  CG  TYR B  52     112.570  74.766  12.180  1.00 83.07           C  
ATOM    378  CD1 TYR B  52     113.338  75.757  11.606  1.00 83.07           C  
ATOM    379  CD2 TYR B  52     111.190  74.880  12.122  1.00 83.07           C  
ATOM    380  CE1 TYR B  52     112.758  76.842  10.964  1.00 83.07           C  
ATOM    381  CE2 TYR B  52     110.585  75.964  11.479  1.00 83.07           C  
ATOM    382  CZ  TYR B  52     111.385  76.948  10.901  1.00 83.07           C  
ATOM    383  OH  TYR B  52     110.827  78.041  10.269  1.00 83.07           O  
ATOM    384  N   TYR B  53     113.843  71.977  15.936  1.00 83.07           N  
ATOM    385  CA  TYR B  53     113.734  70.653  16.551  1.00 83.07           C  
ATOM    386  C   TYR B  53     114.038  70.580  18.062  1.00 83.07           C  
ATOM    387  O   TYR B  53     115.207  70.672  18.478  1.00 83.07           O  
ATOM    388  CB  TYR B  53     114.674  69.663  15.860  1.00 83.07           C  
ATOM    389  CG  TYR B  53     114.354  69.268  14.443  1.00 83.07           C  
ATOM    390  CD1 TYR B  53     114.723  70.083  13.380  1.00 83.07           C  
ATOM    391  CD2 TYR B  53     113.758  68.042  14.160  1.00 83.07           C  
ATOM    392  CE1 TYR B  53     114.459  69.717  12.072  1.00 83.07           C  
ATOM    393  CE2 TYR B  53     113.495  67.658  12.850  1.00 83.07           C  
ATOM    394  CZ  TYR B  53     113.846  68.504  11.809  1.00 83.07           C  
ATOM    395  OH  TYR B  53     113.590  68.155  10.503  1.00 83.07           O  
ATOM    396  N   ASN B  54     112.990  70.417  18.871  1.00 83.07           N  
ATOM    397  CA  ASN B  54     113.138  70.153  20.298  1.00 83.07           C  
ATOM    398  C   ASN B  54     113.577  68.680  20.265  1.00 83.07           C  
ATOM    399  O   ASN B  54     112.921  67.873  19.620  1.00 83.07           O  
ATOM    400  CB  ASN B  54     111.778  70.294  21.011  1.00 83.07           C  
ATOM    401  CG  ASN B  54     111.872  70.978  22.392  1.00 83.07           C  
ATOM    402  ND2 ASN B  54     110.882  71.815  22.704  1.00 83.07           N  
ATOM    403  OD1 ASN B  54     112.802  70.736  23.169  1.00 83.07           O  
ATOM    404  N   GLU B  55     114.682  68.321  20.909  1.00 83.07           N  
ATOM    405  CA  GLU B  55     115.157  66.933  20.834  1.00 83.07           C  
ATOM    406  C   GLU B  55     114.951  66.145  22.125  1.00 83.07           C  
ATOM    407  O   GLU B  55     115.348  66.609  23.192  1.00 83.07           O  
ATOM    408  CB  GLU B  55     116.618  66.915  20.431  1.00 83.07           C  
ATOM    409  CG  GLU B  55     117.263  68.281  20.537  1.00 83.07           C  
ATOM    410  CD  GLU B  55     118.215  68.366  21.710  1.00 83.07           C  
ATOM    411  OE1 GLU B  55     117.889  67.823  22.793  1.00 83.07           O  
ATOM    412  OE2 GLU B  55     119.301  68.969  21.543  1.00 83.07           O1-
ATOM    413  N   ALA B  56     114.356  64.948  22.010  1.00 83.07           N  
ATOM    414  CA  ALA B  56     114.002  64.085  23.166  1.00 83.07           C  
ATOM    415  C   ALA B  56     114.950  62.902  23.493  1.00 83.07           C  
ATOM    416  O   ALA B  56     116.137  62.943  23.149  1.00 83.07           O  
ATOM    417  CB  ALA B  56     112.523  63.606  23.055  1.00 83.07           C  
ATOM    418  N   ALA B  57     114.403  61.872  24.157  1.00 83.07           N  
ATOM    419  CA  ALA B  57     115.122  60.662  24.631  1.00 83.07           C  
ATOM    420  C   ALA B  57     116.194  60.055  23.701  1.00 83.07           C  
ATOM    421  O   ALA B  57     115.958  59.891  22.498  1.00 83.07           O  
ATOM    422  CB  ALA B  57     114.112  59.580  25.058  1.00 83.07           C  
ATOM    423  N   GLY B  58     117.355  59.711  24.280  1.00 83.07           N  
ATOM    424  CA  GLY B  58     118.484  59.136  23.546  1.00 83.07           C  
ATOM    425  C   GLY B  58     119.045  60.049  22.456  1.00 83.07           C  
ATOM    426  O   GLY B  58     119.475  61.171  22.743  1.00 83.07           O  
ATOM    427  N   ASN B  59     119.054  59.568  21.209  1.00 83.07           N  
ATOM    428  CA  ASN B  59     119.506  60.363  20.059  1.00 83.07           C  
ATOM    429  C   ASN B  59     118.330  61.190  19.532  1.00 83.07           C  
ATOM    430  O   ASN B  59     118.327  62.418  19.669  1.00 83.07           O  
ATOM    431  CB  ASN B  59     120.079  59.464  18.967  1.00 83.07           C  
ATOM    432  N   LYS B  60     117.344  60.495  18.949  1.00 83.07           N  
ATOM    433  CA  LYS B  60     116.084  61.049  18.398  1.00 83.07           C  
ATOM    434  C   LYS B  60     115.996  62.576  18.219  1.00 83.07           C  
ATOM    435  O   LYS B  60     116.507  63.341  19.040  1.00 83.07           O  
ATOM    436  CB  LYS B  60     114.888  60.566  19.247  1.00 83.07           C  
ATOM    437  CG  LYS B  60     114.400  59.129  18.977  1.00 83.07           C  
ATOM    438  CD  LYS B  60     112.878  59.002  19.199  1.00 83.07           C  
ATOM    439  CE  LYS B  60     112.483  57.626  19.739  1.00 83.07           C  
ATOM    440  NZ  LYS B  60     112.545  57.550  21.230  1.00 83.07           N1+
ATOM    441  N   TYR B  61     115.317  63.031  17.172  1.00 83.07           N  
ATOM    442  CA  TYR B  61     115.219  64.477  16.996  1.00 83.07           C  
ATOM    443  C   TYR B  61     113.853  65.170  17.121  1.00 83.07           C  
ATOM    444  O   TYR B  61     113.812  66.331  17.503  1.00 83.07           O  
ATOM    445  CB  TYR B  61     116.009  64.949  15.777  1.00 83.07           C  
ATOM    446  CG  TYR B  61     117.337  65.550  16.175  1.00 83.07           C  
ATOM    447  CD1 TYR B  61     118.080  66.310  15.281  1.00 83.07           C  
ATOM    448  CD2 TYR B  61     117.850  65.362  17.461  1.00 83.07           C  
ATOM    449  CE1 TYR B  61     119.315  66.867  15.656  1.00 83.07           C  
ATOM    450  CE2 TYR B  61     119.076  65.910  17.848  1.00 83.07           C  
ATOM    451  CZ  TYR B  61     119.807  66.661  16.943  1.00 83.07           C  
ATOM    452  OH  TYR B  61     121.020  67.197  17.330  1.00 83.07           O  
ATOM    453  N   VAL B  62     112.762  64.471  16.814  1.00 83.07           N  
ATOM    454  CA  VAL B  62     111.387  65.001  16.937  1.00 83.07           C  
ATOM    455  C   VAL B  62     111.173  66.535  16.783  1.00 83.07           C  
ATOM    456  O   VAL B  62     111.496  67.305  17.677  1.00 83.07           O  
ATOM    457  CB  VAL B  62     110.675  64.450  18.239  1.00 83.07           C  
ATOM    458  CG1 VAL B  62     111.681  64.038  19.308  1.00 83.07           C  
ATOM    459  CG2 VAL B  62     109.651  65.444  18.819  1.00 83.07           C  
ATOM    460  N   PRO B  63     110.608  66.968  15.659  1.00 83.07           N  
ATOM    461  CA  PRO B  63     110.335  68.390  15.421  1.00 83.07           C  
ATOM    462  C   PRO B  63     109.389  69.006  16.428  1.00 83.07           C  
ATOM    463  O   PRO B  63     108.544  68.327  16.981  1.00 83.07           O  
ATOM    464  CB  PRO B  63     109.646  68.390  14.062  1.00 83.07           C  
ATOM    465  CG  PRO B  63     109.206  67.022  13.842  1.00 83.07           C  
ATOM    466  CD  PRO B  63     110.205  66.141  14.511  1.00 83.07           C  
ATOM    467  N   ARG B  64     109.542  70.302  16.650  1.00 83.07           N  
ATOM    468  CA  ARG B  64     108.684  71.049  17.548  1.00 83.07           C  
ATOM    469  C   ARG B  64     107.468  71.346  16.726  1.00 83.07           C  
ATOM    470  O   ARG B  64     107.313  72.461  16.229  1.00 83.07           O  
ATOM    471  CB  ARG B  64     109.345  72.365  17.926  1.00 83.07           C  
ATOM    472  CG  ARG B  64     109.086  72.817  19.331  1.00 83.07           C  
ATOM    473  CD  ARG B  64     110.330  73.269  20.039  1.00 83.07           C  
ATOM    474  NE  ARG B  64     111.026  74.327  19.315  1.00 83.07           N  
ATOM    475  CZ  ARG B  64     112.340  74.487  19.294  1.00 83.07           C  
ATOM    476  NH1 ARG B  64     113.114  73.642  19.954  1.00 83.07           N1+
ATOM    477  NH2 ARG B  64     112.882  75.493  18.612  1.00 83.07           N  
ATOM    478  N   ALA B  65     106.615  70.347  16.551  1.00 83.07           N  
ATOM    479  CA  ALA B  65     105.431  70.536  15.735  1.00 83.07           C  
ATOM    480  C   ALA B  65     104.142  70.061  16.387  1.00 83.07           C  
ATOM    481  O   ALA B  65     104.099  69.011  17.036  1.00 83.07           O  
ATOM    482  CB  ALA B  65     105.619  69.891  14.373  1.00 83.07           C  
ATOM    483  N   ILE B  66     103.101  70.872  16.209  1.00 83.07           N  
ATOM    484  CA  ILE B  66     101.758  70.577  16.682  1.00 83.07           C  
ATOM    485  C   ILE B  66     100.888  70.311  15.456  1.00 83.07           C  
ATOM    486  O   ILE B  66     100.920  71.074  14.479  1.00 83.07           O  
ATOM    487  CB  ILE B  66     101.212  71.750  17.492  1.00 83.07           C  
ATOM    488  CG1 ILE B  66     101.834  71.756  18.875  1.00 83.07           C  
ATOM    489  CG2 ILE B  66      99.725  71.633  17.672  1.00 83.07           C  
ATOM    490  CD1 ILE B  66     103.000  72.678  18.988  1.00 83.07           C  
ATOM    491  N   LEU B  67     100.118  69.231  15.502  1.00 83.07           N  
ATOM    492  CA  LEU B  67      99.262  68.855  14.381  1.00 83.07           C  
ATOM    493  C   LEU B  67      97.773  68.984  14.730  1.00 83.07           C  
ATOM    494  O   LEU B  67      97.297  68.342  15.669  1.00 83.07           O  
ATOM    495  CB  LEU B  67      99.626  67.439  13.927  1.00 83.07           C  
ATOM    496  CG  LEU B  67     101.070  67.334  13.446  1.00 83.07           C  
ATOM    497  CD1 LEU B  67     101.388  65.967  12.912  1.00 83.07           C  
ATOM    498  CD2 LEU B  67     101.278  68.366  12.372  1.00 83.07           C  
ATOM    499  N   VAL B  68      97.039  69.798  13.975  1.00 83.07           N  
ATOM    500  CA  VAL B  68      95.640  70.039  14.287  1.00 83.07           C  
ATOM    501  C   VAL B  68      94.696  69.822  13.125  1.00 83.07           C  
ATOM    502  O   VAL B  68      95.022  70.145  12.006  1.00 83.07           O  
ATOM    503  CB  VAL B  68      95.434  71.481  14.769  1.00 83.07           C  
ATOM    504  CG1 VAL B  68      94.240  71.562  15.687  1.00 83.07           C  
ATOM    505  CG2 VAL B  68      96.664  72.010  15.465  1.00 83.07           C  
ATOM    506  N   ASP B  69      93.514  69.292  13.412  1.00 83.07           N  
ATOM    507  CA  ASP B  69      92.461  69.083  12.415  1.00 83.07           C  
ATOM    508  C   ASP B  69      91.136  68.728  13.094  1.00 83.07           C  
ATOM    509  O   ASP B  69      91.113  68.379  14.273  1.00 83.07           O  
ATOM    510  CB  ASP B  69      92.846  67.987  11.417  1.00 83.07           C  
ATOM    511  CG  ASP B  69      92.131  68.134  10.073  1.00 83.07           C  
ATOM    512  OD1 ASP B  69      90.883  67.999  10.023  1.00 83.07           O  
ATOM    513  OD2 ASP B  69      92.735  68.384   9.006  1.00 83.07           O1-
ATOM    514  N   LEU B  70      90.035  68.807  12.352  1.00 83.07           N  
ATOM    515  CA  LEU B  70      88.723  68.484  12.913  1.00 83.07           C  
ATOM    516  C   LEU B  70      88.101  67.181  12.362  1.00 83.07           C  
ATOM    517  O   LEU B  70      86.899  66.937  12.532  1.00 83.07           O  
ATOM    518  CB  LEU B  70      87.781  69.697  12.834  1.00 83.07           C  
ATOM    519  CG  LEU B  70      88.207  70.832  13.768  1.00 83.07           C  
ATOM    520  CD1 LEU B  70      88.961  71.846  12.997  1.00 83.07           C  
ATOM    521  CD2 LEU B  70      87.039  71.486  14.402  1.00 83.07           C  
ATOM    522  N   GLU B  71      88.952  66.352  11.741  1.00 83.07           N  
ATOM    523  CA  GLU B  71      88.606  65.030  11.186  1.00 83.07           C  
ATOM    524  C   GLU B  71      89.875  64.168  11.088  1.00 83.07           C  
ATOM    525  O   GLU B  71      90.856  64.590  10.494  1.00 83.07           O  
ATOM    526  CB  GLU B  71      87.847  65.144   9.839  1.00 83.07           C  
ATOM    527  CG  GLU B  71      88.616  64.865   8.536  1.00 83.07           C  
ATOM    528  CD  GLU B  71      88.282  65.845   7.385  1.00 83.07           C  
ATOM    529  OE1 GLU B  71      87.101  65.896   6.948  1.00 83.07           O  
ATOM    530  OE2 GLU B  71      89.194  66.570   6.891  1.00 83.07           O1-
ATOM    531  N   PRO B  72      89.860  62.974  11.677  1.00 83.07           N  
ATOM    532  CA  PRO B  72      91.035  62.084  11.712  1.00 83.07           C  
ATOM    533  C   PRO B  72      91.784  61.908  10.391  1.00 83.07           C  
ATOM    534  O   PRO B  72      92.917  62.361  10.292  1.00 83.07           O  
ATOM    535  CB  PRO B  72      90.447  60.742  12.154  1.00 83.07           C  
ATOM    536  CG  PRO B  72      89.251  61.101  12.943  1.00 83.07           C  
ATOM    537  CD  PRO B  72      88.703  62.376  12.361  1.00 83.07           C  
ATOM    538  N   GLY B  73      91.160  61.257   9.413  1.00 83.07           N  
ATOM    539  CA  GLY B  73      91.746  60.989   8.106  1.00 83.07           C  
ATOM    540  C   GLY B  73      93.082  61.618   7.722  1.00 83.07           C  
ATOM    541  O   GLY B  73      94.106  60.926   7.659  1.00 83.07           O  
ATOM    542  N   THR B  74      93.060  62.928   7.466  1.00 83.07           N  
ATOM    543  CA  THR B  74      94.228  63.711   7.025  1.00 83.07           C  
ATOM    544  C   THR B  74      95.486  63.520   7.876  1.00 83.07           C  
ATOM    545  O   THR B  74      96.601  63.595   7.373  1.00 83.07           O  
ATOM    546  CB  THR B  74      93.861  65.211   6.967  1.00 83.07           C  
ATOM    547  CG2 THR B  74      92.591  65.425   6.161  1.00 83.07           C  
ATOM    548  OG1 THR B  74      93.485  65.656   8.276  1.00 83.07           O  
ATOM    549  N   MET B  75      95.292  63.277   9.165  1.00 83.07           N  
ATOM    550  CA  MET B  75      96.388  63.076  10.103  1.00 83.07           C  
ATOM    551  C   MET B  75      97.005  61.698   9.952  1.00 83.07           C  
ATOM    552  O   MET B  75      98.223  61.549   9.962  1.00 83.07           O  
ATOM    553  CB  MET B  75      95.874  63.235  11.525  1.00 83.07           C  
ATOM    554  CG  MET B  75      95.021  64.468  11.717  1.00 83.07           C  
ATOM    555  SD  MET B  75      95.875  65.721  12.684  1.00 83.07           S  
ATOM    556  CE  MET B  75      95.486  65.106  14.381  1.00 83.07           C  
ATOM    557  N   ASP B  76      96.148  60.693   9.818  1.00 83.07           N  
ATOM    558  CA  ASP B  76      96.567  59.301   9.674  1.00 83.07           C  
ATOM    559  C   ASP B  76      97.179  59.079   8.293  1.00 83.07           C  
ATOM    560  O   ASP B  76      97.777  58.040   8.008  1.00 83.07           O  
ATOM    561  CB  ASP B  76      95.374  58.370   9.944  1.00 83.07           C  
ATOM    562  CG  ASP B  76      94.595  58.743  11.236  1.00 83.07           C  
ATOM    563  OD1 ASP B  76      94.877  59.802  11.854  1.00 83.07           O  
ATOM    564  OD2 ASP B  76      93.677  58.027  11.706  1.00 83.07           O1-
ATOM    565  N   SER B  77      97.010  60.095   7.452  1.00 83.07           N  
ATOM    566  CA  SER B  77      97.591  60.163   6.124  1.00 83.07           C  
ATOM    567  C   SER B  77      99.071  60.450   6.307  1.00 83.07           C  
ATOM    568  O   SER B  77      99.910  59.920   5.581  1.00 83.07           O  
ATOM    569  CB  SER B  77      96.971  61.319   5.347  1.00 83.07           C  
ATOM    570  OG  SER B  77      96.086  60.849   4.356  1.00 83.07           O  
ATOM    571  N   VAL B  78      99.380  61.304   7.280  1.00 83.07           N  
ATOM    572  CA  VAL B  78     100.759  61.628   7.600  1.00 83.07           C  
ATOM    573  C   VAL B  78     101.396  60.458   8.332  1.00 83.07           C  
ATOM    574  O   VAL B  78     102.448  59.979   7.903  1.00 83.07           O  
ATOM    575  CB  VAL B  78     100.895  62.868   8.487  1.00 83.07           C  
ATOM    576  CG1 VAL B  78     102.225  63.535   8.226  1.00 83.07           C  
ATOM    577  CG2 VAL B  78      99.753  63.826   8.259  1.00 83.07           C  
ATOM    578  N   ARG B  79     100.756  59.988   9.413  1.00 83.07           N  
ATOM    579  CA  ARG B  79     101.310  58.900  10.227  1.00 83.07           C  
ATOM    580  C   ARG B  79     101.717  57.709   9.375  1.00 83.07           C  
ATOM    581  O   ARG B  79     102.846  57.223   9.469  1.00 83.07           O  
ATOM    582  CB  ARG B  79     100.381  58.485  11.376  1.00 83.07           C  
ATOM    583  CG  ARG B  79     101.152  57.975  12.628  1.00 83.07           C  
ATOM    584  CD  ARG B  79     100.317  57.757  13.910  1.00 83.07           C  
ATOM    585  NE  ARG B  79      99.513  58.935  14.265  1.00 83.07           N  
ATOM    586  CZ  ARG B  79      98.195  58.926  14.505  1.00 83.07           C  
ATOM    587  NH1 ARG B  79      97.499  57.790  14.449  1.00 83.07           N1+
ATOM    588  NH2 ARG B  79      97.570  60.062  14.805  1.00 83.07           N  
ATOM    589  N   SER B  80     100.805  57.259   8.525  1.00 83.07           N  
ATOM    590  CA  SER B  80     101.114  56.165   7.618  1.00 83.07           C  
ATOM    591  C   SER B  80     101.583  56.769   6.290  1.00 83.07           C  
ATOM    592  O   SER B  80     100.982  56.517   5.245  1.00 83.07           O  
ATOM    593  CB  SER B  80      99.885  55.265   7.422  1.00 83.07           C  
ATOM    594  OG  SER B  80     100.030  54.028   8.102  1.00 83.07           O  
ATOM    595  N   GLY B  81     102.655  57.563   6.332  1.00 83.07           N  
ATOM    596  CA  GLY B  81     103.135  58.233   5.135  1.00 83.07           C  
ATOM    597  C   GLY B  81     104.633  58.445   4.994  1.00 83.07           C  
ATOM    598  O   GLY B  81     105.399  57.489   5.141  1.00 83.07           O  
ATOM    599  N   PRO B  82     105.043  59.693   4.708  1.00 83.07           N  
ATOM    600  CA  PRO B  82     106.466  60.049   4.490  1.00 83.07           C  
ATOM    601  C   PRO B  82     107.366  59.863   5.723  1.00 83.07           C  
ATOM    602  O   PRO B  82     108.028  58.829   5.849  1.00 83.07           O  
ATOM    603  CB  PRO B  82     106.403  61.535   4.089  1.00 83.07           C  
ATOM    604  CG  PRO B  82     105.063  62.062   4.601  1.00 83.07           C  
ATOM    605  CD  PRO B  82     104.146  60.867   4.591  1.00 83.07           C  
ATOM    606  N   PHE B  83     107.404  60.870   6.593  1.00 83.07           N  
ATOM    607  CA  PHE B  83     108.132  60.790   7.849  1.00 83.07           C  
ATOM    608  C   PHE B  83     107.087  60.716   8.969  1.00 83.07           C  
ATOM    609  O   PHE B  83     107.080  61.518   9.903  1.00 83.07           O  
ATOM    610  CB  PHE B  83     109.080  61.981   7.996  1.00 83.07           C  
ATOM    611  CG  PHE B  83     110.475  61.718   7.469  1.00 83.07           C  
ATOM    612  CD1 PHE B  83     111.402  62.750   7.365  1.00 83.07           C  
ATOM    613  CD2 PHE B  83     110.871  60.435   7.079  1.00 83.07           C  
ATOM    614  CE1 PHE B  83     112.705  62.514   6.878  1.00 83.07           C  
ATOM    615  CE2 PHE B  83     112.170  60.192   6.594  1.00 83.07           C  
ATOM    616  CZ  PHE B  83     113.084  61.234   6.496  1.00 83.07           C  
ATOM    617  N   GLY B  84     106.201  59.728   8.848  1.00 83.07           N  
ATOM    618  CA  GLY B  84     105.098  59.536   9.765  1.00 83.07           C  
ATOM    619  C   GLY B  84     105.520  59.324  11.191  1.00 83.07           C  
ATOM    620  O   GLY B  84     104.925  59.875  12.111  1.00 83.07           O  
ATOM    621  N   GLN B  85     106.567  58.536  11.371  1.00 83.07           N  
ATOM    622  CA  GLN B  85     107.063  58.217  12.702  1.00 83.07           C  
ATOM    623  C   GLN B  85     107.762  59.373  13.413  1.00 83.07           C  
ATOM    624  O   GLN B  85     107.939  59.326  14.628  1.00 83.07           O  
ATOM    625  CB  GLN B  85     108.027  57.031  12.628  1.00 83.07           C  
ATOM    626  CG  GLN B  85     107.714  56.051  11.522  1.00 83.07           C  
ATOM    627  CD  GLN B  85     106.742  54.990  11.976  1.00 83.07           C  
ATOM    628  NE2 GLN B  85     105.454  55.329  12.005  1.00 83.07           N  
ATOM    629  OE1 GLN B  85     107.150  53.878  12.307  1.00 83.07           O  
ATOM    630  N   ILE B  86     108.139  60.411  12.673  1.00 83.07           N  
ATOM    631  CA  ILE B  86     108.916  61.511  13.245  1.00 83.07           C  
ATOM    632  C   ILE B  86     108.273  62.369  14.332  1.00 83.07           C  
ATOM    633  O   ILE B  86     108.944  62.731  15.290  1.00 83.07           O  
ATOM    634  CB  ILE B  86     109.501  62.397  12.124  1.00 83.07           C  
ATOM    635  CG1 ILE B  86     110.885  62.874  12.519  1.00 83.07           C  
ATOM    636  CG2 ILE B  86     108.615  63.598  11.815  1.00 83.07           C  
ATOM    637  CD1 ILE B  86     111.736  63.185  11.341  1.00 83.07           C  
ATOM    638  N   PHE B  87     106.988  62.677  14.184  1.00 83.07           N  
ATOM    639  CA  PHE B  87     106.286  63.567  15.104  1.00 83.07           C  
ATOM    640  C   PHE B  87     105.949  62.927  16.444  1.00 83.07           C  
ATOM    641  O   PHE B  87     105.714  61.727  16.510  1.00 83.07           O  
ATOM    642  CB  PHE B  87     105.020  64.112  14.434  1.00 83.07           C  
ATOM    643  CG  PHE B  87     105.269  64.745  13.089  1.00 83.07           C  
ATOM    644  CD1 PHE B  87     105.840  66.007  12.985  1.00 83.07           C  
ATOM    645  CD2 PHE B  87     104.933  64.076  11.927  1.00 83.07           C  
ATOM    646  CE1 PHE B  87     106.068  66.583  11.752  1.00 83.07           C  
ATOM    647  CE2 PHE B  87     105.165  64.654  10.688  1.00 83.07           C  
ATOM    648  CZ  PHE B  87     105.732  65.908  10.606  1.00 83.07           C  
ATOM    649  N   ARG B  88     105.928  63.731  17.506  1.00 83.07           N  
ATOM    650  CA  ARG B  88     105.608  63.233  18.841  1.00 83.07           C  
ATOM    651  C   ARG B  88     104.133  62.857  18.949  1.00 83.07           C  
ATOM    652  O   ARG B  88     103.264  63.698  18.750  1.00 83.07           O  
ATOM    653  CB  ARG B  88     105.984  64.253  19.909  1.00 83.07           C  
ATOM    654  CG  ARG B  88     106.309  63.622  21.266  1.00 83.07           C  
ATOM    655  CD  ARG B  88     107.582  64.167  21.944  1.00 83.07           C  
ATOM    656  NE  ARG B  88     107.498  65.612  22.180  1.00 83.07           N  
ATOM    657  CZ  ARG B  88     106.946  66.173  23.255  1.00 83.07           C  
ATOM    658  NH1 ARG B  88     106.430  65.412  24.228  1.00 83.07           N1+
ATOM    659  NH2 ARG B  88     106.914  67.500  23.359  1.00 83.07           N  
ATOM    660  N   PRO B  89     103.867  61.591  19.267  1.00 83.07           N  
ATOM    661  CA  PRO B  89     102.505  61.049  19.352  1.00 83.07           C  
ATOM    662  C   PRO B  89     101.423  61.958  19.954  1.00 83.07           C  
ATOM    663  O   PRO B  89     100.514  62.308  19.205  1.00 83.07           O  
ATOM    664  CB  PRO B  89     102.691  59.782  20.193  1.00 83.07           C  
ATOM    665  CG  PRO B  89     104.066  59.319  19.853  1.00 83.07           C  
ATOM    666  CD  PRO B  89     104.877  60.560  19.571  1.00 83.07           C  
ATOM    667  N   ASP B  90     101.491  62.331  21.235  1.00 83.07           N  
ATOM    668  CA  ASP B  90     100.431  63.172  21.806  1.00 83.07           C  
ATOM    669  C   ASP B  90     100.591  64.636  21.421  1.00 83.07           C  
ATOM    670  O   ASP B  90     100.196  65.537  22.155  1.00 83.07           O  
ATOM    671  CB  ASP B  90     100.283  62.997  23.317  1.00 83.07           C  
ATOM    672  CG  ASP B  90     101.603  62.877  24.007  1.00 83.07           C  
ATOM    673  OD1 ASP B  90     102.568  63.544  23.556  1.00 83.07           O  
ATOM    674  OD2 ASP B  90     101.767  62.126  24.995  1.00 83.07           O1-
ATOM    675  N   ASN B  91     101.192  64.861  20.263  1.00 83.07           N  
ATOM    676  CA  ASN B  91     101.278  66.194  19.722  1.00 83.07           C  
ATOM    677  C   ASN B  91     100.194  66.369  18.662  1.00 83.07           C  
ATOM    678  O   ASN B  91      99.871  67.491  18.278  1.00 83.07           O  
ATOM    679  CB  ASN B  91     102.656  66.469  19.164  1.00 83.07           C  
ATOM    680  CG  ASN B  91     103.384  67.464  19.976  1.00 83.07           C  
ATOM    681  ND2 ASN B  91     102.856  68.671  20.023  1.00 83.07           N  
ATOM    682  OD1 ASN B  91     104.393  67.158  20.595  1.00 83.07           O  
ATOM    683  N   PHE B  92      99.636  65.252  18.193  1.00 83.07           N  
ATOM    684  CA  PHE B  92      98.548  65.251  17.222  1.00 83.07           C  
ATOM    685  C   PHE B  92      97.281  65.614  17.972  1.00 83.07           C  
ATOM    686  O   PHE B  92      97.041  65.111  19.070  1.00 83.07           O  
ATOM    687  CB  PHE B  92      98.310  63.839  16.680  1.00 83.07           C  
ATOM    688  CG  PHE B  92      99.393  63.307  15.774  1.00 83.07           C  
ATOM    689  CD1 PHE B  92     100.467  62.569  16.294  1.00 83.07           C  
ATOM    690  CD2 PHE B  92      99.304  63.471  14.390  1.00 83.07           C  
ATOM    691  CE1 PHE B  92     101.472  62.043  15.450  1.00 83.07           C  
ATOM    692  CE2 PHE B  92     100.301  62.944  13.530  1.00 83.07           C  
ATOM    693  CZ  PHE B  92     101.389  62.234  14.065  1.00 83.07           C  
ATOM    694  N   VAL B  93      96.454  66.471  17.396  1.00 83.07           N  
ATOM    695  CA  VAL B  93      95.184  66.791  18.036  1.00 83.07           C  
ATOM    696  C   VAL B  93      94.021  66.553  17.064  1.00 83.07           C  
ATOM    697  O   VAL B  93      93.742  67.385  16.201  1.00 83.07           O  
ATOM    698  CB  VAL B  93      95.161  68.209  18.647  1.00 83.07           C  
ATOM    699  CG1 VAL B  93      94.040  68.318  19.639  1.00 83.07           C  
ATOM    700  CG2 VAL B  93      96.463  68.516  19.355  1.00 83.07           C  
ATOM    701  N   PHE B  94      93.372  65.393  17.213  1.00 83.07           N  
ATOM    702  CA  PHE B  94      92.243  64.972  16.373  1.00 83.07           C  
ATOM    703  C   PHE B  94      91.028  65.838  16.572  1.00 83.07           C  
ATOM    704  O   PHE B  94      90.873  66.462  17.612  1.00 83.07           O  
ATOM    705  CB  PHE B  94      91.792  63.550  16.728  1.00 83.07           C  
ATOM    706  CG  PHE B  94      92.849  62.496  16.557  1.00 83.07           C  
ATOM    707  CD1 PHE B  94      92.978  61.480  17.516  1.00 83.07           C  
ATOM    708  CD2 PHE B  94      93.696  62.489  15.434  1.00 83.07           C  
ATOM    709  CE1 PHE B  94      93.952  60.481  17.377  1.00 83.07           C  
ATOM    710  CE2 PHE B  94      94.677  61.498  15.281  1.00 83.07           C  
ATOM    711  CZ  PHE B  94      94.806  60.489  16.257  1.00 83.07           C  
ATOM    712  N   GLY B  95      90.147  65.831  15.579  1.00 83.07           N  
ATOM    713  CA  GLY B  95      88.891  66.560  15.643  1.00 83.07           C  
ATOM    714  C   GLY B  95      87.685  65.648  15.848  1.00 83.07           C  
ATOM    715  O   GLY B  95      86.815  65.927  16.698  1.00 83.07           O  
ATOM    716  N   GLN B  96      87.632  64.566  15.066  1.00 83.07           N  
ATOM    717  CA  GLN B  96      86.562  63.567  15.148  1.00 83.07           C  
ATOM    718  C   GLN B  96      85.267  64.028  14.465  1.00 83.07           C  
ATOM    719  O   GLN B  96      84.793  63.405  13.510  1.00 83.07           O  
ATOM    720  CB  GLN B  96      86.300  63.171  16.623  1.00 83.07           C  
ATOM    721  CG  GLN B  96      85.844  61.731  16.869  1.00 83.07           C  
ATOM    722  CD  GLN B  96      86.442  60.733  15.880  1.00 83.07           C  
ATOM    723  NE2 GLN B  96      85.577  59.934  15.247  1.00 83.07           N  
ATOM    724  OE1 GLN B  96      87.665  60.688  15.688  1.00 83.07           O  
ATOM    725  N   SER B  97      84.724  65.138  14.961  1.00 83.07           N  
ATOM    726  CA  SER B  97      83.455  65.713  14.517  1.00 83.07           C  
ATOM    727  C   SER B  97      83.486  66.226  13.083  1.00 83.07           C  
ATOM    728  O   SER B  97      84.502  66.112  12.397  1.00 83.07           O  
ATOM    729  CB  SER B  97      83.049  66.844  15.483  1.00 83.07           C  
ATOM    730  OG  SER B  97      84.167  67.662  15.844  1.00 83.07           O  
ATOM    731  N   GLY B  98      82.352  66.773  12.640  1.00 83.07           N  
ATOM    732  CA  GLY B  98      82.226  67.367  11.322  1.00 83.07           C  
ATOM    733  C   GLY B  98      83.354  68.356  11.078  1.00 83.07           C  
ATOM    734  O   GLY B  98      83.776  69.094  11.979  1.00 83.07           O  
ATOM    735  N   ALA B  99      83.854  68.341   9.848  1.00 83.07           N  
ATOM    736  CA  ALA B  99      84.945  69.216   9.423  1.00 83.07           C  
ATOM    737  C   ALA B  99      84.491  70.668   9.406  1.00 83.07           C  
ATOM    738  O   ALA B  99      84.759  71.434  10.327  1.00 83.07           O  
ATOM    739  CB  ALA B  99      85.450  68.797   8.018  1.00 83.07           C  
ATOM    740  N   GLY B 100      83.798  71.027   8.336  1.00 83.07           N  
ATOM    741  CA  GLY B 100      83.291  72.361   8.154  1.00 83.07           C  
ATOM    742  C   GLY B 100      83.289  72.709   6.682  1.00 83.07           C  
ATOM    743  O   GLY B 100      82.299  72.471   5.967  1.00 83.07           O  
ATOM    744  N   ASN B 101      84.434  73.209   6.218  1.00 83.07           N  
ATOM    745  CA  ASN B 101      84.578  73.793   4.882  1.00 83.07           C  
ATOM    746  C   ASN B 101      83.641  74.970   4.862  1.00 83.07           C  
ATOM    747  O   ASN B 101      83.037  75.316   3.846  1.00 83.07           O  
ATOM    748  CB  ASN B 101      84.316  72.813   3.755  1.00 83.07           C  
ATOM    749  CG  ASN B 101      85.612  72.298   3.147  1.00 83.07           C  
ATOM    750  ND2 ASN B 101      86.479  71.724   3.994  1.00 83.07           N  
ATOM    751  OD1 ASN B 101      85.850  72.432   1.941  1.00 83.07           O  
ATOM    752  N   ASN B 102      83.552  75.539   6.066  1.00 83.07           N  
ATOM    753  CA  ASN B 102      82.739  76.680   6.462  1.00 83.07           C  
ATOM    754  C   ASN B 102      83.403  77.274   7.707  1.00 83.07           C  
ATOM    755  O   ASN B 102      83.490  76.645   8.770  1.00 83.07           O  
ATOM    756  CB  ASN B 102      81.275  76.255   6.691  1.00 83.07           C  
ATOM    757  CG  ASN B 102      80.692  76.803   7.967  1.00 83.07           C  
ATOM    758  ND2 ASN B 102      79.692  77.669   7.843  1.00 83.07           N  
ATOM    759  OD1 ASN B 102      81.123  76.439   9.051  1.00 83.07           O  
ATOM    760  N   TRP B 103      83.909  78.483   7.519  1.00 83.07           N  
ATOM    761  CA  TRP B 103      84.668  79.203   8.518  1.00 83.07           C  
ATOM    762  C   TRP B 103      83.999  79.154   9.842  1.00 83.07           C  
ATOM    763  O   TRP B 103      84.562  78.653  10.796  1.00 83.07           O  
ATOM    764  CB  TRP B 103      84.805  80.646   8.084  1.00 83.07           C  
ATOM    765  CG  TRP B 103      85.840  81.430   8.777  1.00 83.07           C  
ATOM    766  CD1 TRP B 103      87.171  81.438   8.516  1.00 83.07           C  
ATOM    767  CD2 TRP B 103      85.622  82.375   9.811  1.00 83.07           C  
ATOM    768  CE2 TRP B 103      86.872  82.916  10.151  1.00 83.07           C  
ATOM    769  CE3 TRP B 103      84.488  82.823  10.498  1.00 83.07           C  
ATOM    770  NE1 TRP B 103      87.808  82.319   9.349  1.00 83.07           N  
ATOM    771  CZ2 TRP B 103      87.023  83.883  11.146  1.00 83.07           C  
ATOM    772  CZ3 TRP B 103      84.632  83.782  11.481  1.00 83.07           C  
ATOM    773  CH2 TRP B 103      85.888  84.306  11.795  1.00 83.07           C  
ATOM    774  N   ALA B 104      82.777  79.658   9.882  1.00 83.07           N  
ATOM    775  CA  ALA B 104      82.012  79.708  11.115  1.00 83.07           C  
ATOM    776  C   ALA B 104      82.309  78.506  12.004  1.00 83.07           C  
ATOM    777  O   ALA B 104      82.845  78.660  13.093  1.00 83.07           O  
ATOM    778  CB  ALA B 104      80.523  79.812  10.823  1.00 83.07           C  
ATOM    779  N   LYS B 105      81.999  77.311  11.511  1.00 83.07           N  
ATOM    780  CA  LYS B 105      82.193  76.075  12.266  1.00 83.07           C  
ATOM    781  C   LYS B 105      83.558  76.010  12.966  1.00 83.07           C  
ATOM    782  O   LYS B 105      83.626  75.640  14.141  1.00 83.07           O  
ATOM    783  CB  LYS B 105      81.951  74.827  11.375  1.00 83.07           C  
ATOM    784  CG  LYS B 105      80.549  74.154  11.539  1.00 83.07           C  
ATOM    785  CD  LYS B 105      80.294  72.952  10.581  1.00 83.07           C  
ATOM    786  CE  LYS B 105      79.240  71.975  11.146  1.00 83.07           C  
ATOM    787  NZ  LYS B 105      78.606  71.137  10.105  1.00 83.07           N1+
ATOM    788  N   GLY B 106      84.624  76.399  12.263  1.00 83.07           N  
ATOM    789  CA  GLY B 106      85.983  76.336  12.800  1.00 83.07           C  
ATOM    790  C   GLY B 106      86.448  77.443  13.736  1.00 83.07           C  
ATOM    791  O   GLY B 106      87.352  77.233  14.532  1.00 83.07           O  
ATOM    792  N   HIS B 107      85.839  78.620  13.616  1.00 83.07           N  
ATOM    793  CA  HIS B 107      86.151  79.777  14.455  1.00 83.07           C  
ATOM    794  C   HIS B 107      85.098  80.008  15.572  1.00 83.07           C  
ATOM    795  O   HIS B 107      85.184  80.976  16.328  1.00 83.07           O  
ATOM    796  CB  HIS B 107      86.323  81.037  13.584  1.00 83.07           C  
ATOM    797  CG  HIS B 107      87.015  82.178  14.275  1.00 83.07           C  
ATOM    798  CD2 HIS B 107      86.523  83.291  14.877  1.00 83.07           C  
ATOM    799  ND1 HIS B 107      88.383  82.262  14.380  1.00 83.07           N  
ATOM    800  CE1 HIS B 107      88.704  83.370  15.026  1.00 83.07           C  
ATOM    801  NE2 HIS B 107      87.595  84.013  15.341  1.00 83.07           N  
ATOM    802  N   TYR B 108      84.099  79.136  15.679  1.00 83.07           N  
ATOM    803  CA  TYR B 108      83.107  79.271  16.744  1.00 83.07           C  
ATOM    804  C   TYR B 108      82.699  77.937  17.325  1.00 83.07           C  
ATOM    805  O   TYR B 108      83.283  77.516  18.316  1.00 83.07           O  
ATOM    806  CB  TYR B 108      81.880  80.067  16.298  1.00 83.07           C  
ATOM    807  CG  TYR B 108      82.178  81.493  15.942  1.00 83.07           C  
ATOM    808  CD1 TYR B 108      82.073  81.919  14.639  1.00 83.07           C  
ATOM    809  CD2 TYR B 108      82.573  82.409  16.903  1.00 83.07           C  
ATOM    810  CE1 TYR B 108      82.340  83.218  14.290  1.00 83.07           C  
ATOM    811  CE2 TYR B 108      82.844  83.717  16.568  1.00 83.07           C  
ATOM    812  CZ  TYR B 108      82.722  84.116  15.254  1.00 83.07           C  
ATOM    813  OH  TYR B 108      82.977  85.413  14.871  1.00 83.07           O  
ATOM    814  N   THR B 109      81.730  77.273  16.691  1.00 83.07           N  
ATOM    815  CA  THR B 109      81.175  76.008  17.177  1.00 83.07           C  
ATOM    816  C   THR B 109      82.122  74.806  17.245  1.00 83.07           C  
ATOM    817  O   THR B 109      82.678  74.550  18.302  1.00 83.07           O  
ATOM    818  CB  THR B 109      79.883  75.672  16.444  1.00 83.07           C  
ATOM    819  CG2 THR B 109      78.698  75.990  17.336  1.00 83.07           C  
ATOM    820  OG1 THR B 109      79.709  76.580  15.353  1.00 83.07           O  
ATOM    821  N   GLU B 110      82.314  74.063  16.157  1.00 83.07           N  
ATOM    822  CA  GLU B 110      83.201  72.891  16.218  1.00 83.07           C  
ATOM    823  C   GLU B 110      84.645  73.269  16.514  1.00 83.07           C  
ATOM    824  O   GLU B 110      85.427  72.451  16.994  1.00 83.07           O  
ATOM    825  CB  GLU B 110      83.122  72.029  14.961  1.00 83.07           C  
ATOM    826  CG  GLU B 110      81.730  71.897  14.374  1.00 83.07           C  
ATOM    827  CD  GLU B 110      80.856  70.845  15.064  1.00 83.07           C  
ATOM    828  OE1 GLU B 110      81.246  70.309  16.140  1.00 83.07           O  
ATOM    829  OE2 GLU B 110      79.749  70.549  14.527  1.00 83.07           O1-
ATOM    830  N   GLY B 111      84.984  74.520  16.232  1.00 83.07           N  
ATOM    831  CA  GLY B 111      86.308  75.042  16.501  1.00 83.07           C  
ATOM    832  C   GLY B 111      86.578  75.150  17.994  1.00 83.07           C  
ATOM    833  O   GLY B 111      87.294  74.310  18.551  1.00 83.07           O  
ATOM    834  N   ALA B 112      85.988  76.171  18.631  1.00 83.07           N  
ATOM    835  CA  ALA B 112      86.153  76.430  20.068  1.00 83.07           C  
ATOM    836  C   ALA B 112      86.262  75.142  20.890  1.00 83.07           C  
ATOM    837  O   ALA B 112      87.077  75.053  21.811  1.00 83.07           O  
ATOM    838  CB  ALA B 112      85.049  77.339  20.598  1.00 83.07           C  
ATOM    839  N   GLU B 113      85.460  74.148  20.519  1.00 83.07           N  
ATOM    840  CA  GLU B 113      85.478  72.822  21.119  1.00 83.07           C  
ATOM    841  C   GLU B 113      86.892  72.286  21.366  1.00 83.07           C  
ATOM    842  O   GLU B 113      87.195  71.796  22.447  1.00 83.07           O  
ATOM    843  CB  GLU B 113      84.755  71.861  20.178  1.00 83.07           C  
ATOM    844  CG  GLU B 113      84.872  70.397  20.549  1.00 83.07           C  
ATOM    845  CD  GLU B 113      84.000  70.063  21.743  1.00 83.07           C  
ATOM    846  OE1 GLU B 113      82.826  69.661  21.534  1.00 83.07           O  
ATOM    847  OE2 GLU B 113      84.477  70.224  22.895  1.00 83.07           O1-
ATOM    848  N   LEU B 114      87.752  72.393  20.352  1.00 83.07           N  
ATOM    849  CA  LEU B 114      89.121  71.871  20.403  1.00 83.07           C  
ATOM    850  C   LEU B 114      90.152  72.825  20.958  1.00 83.07           C  
ATOM    851  O   LEU B 114      90.954  72.450  21.792  1.00 83.07           O  
ATOM    852  CB  LEU B 114      89.571  71.436  19.010  1.00 83.07           C  
ATOM    853  CG  LEU B 114      90.739  70.460  18.947  1.00 83.07           C  
ATOM    854  CD1 LEU B 114      90.728  69.484  20.118  1.00 83.07           C  
ATOM    855  CD2 LEU B 114      90.675  69.721  17.637  1.00 83.07           C  
ATOM    856  N   VAL B 115      90.143  74.045  20.452  1.00 83.07           N  
ATOM    857  CA  VAL B 115      91.082  75.096  20.836  1.00 83.07           C  
ATOM    858  C   VAL B 115      91.952  74.867  22.066  1.00 83.07           C  
ATOM    859  O   VAL B 115      93.171  74.790  21.968  1.00 83.07           O  
ATOM    860  CB  VAL B 115      90.347  76.414  21.043  1.00 83.07           C  
ATOM    861  CG1 VAL B 115      91.360  77.551  21.231  1.00 83.07           C  
ATOM    862  CG2 VAL B 115      89.422  76.682  19.868  1.00 83.07           C  
ATOM    863  N   ASP B 116      91.305  74.787  23.222  1.00 83.07           N  
ATOM    864  CA  ASP B 116      91.984  74.604  24.508  1.00 83.07           C  
ATOM    865  C   ASP B 116      92.946  73.408  24.543  1.00 83.07           C  
ATOM    866  O   ASP B 116      94.072  73.543  24.998  1.00 83.07           O  
ATOM    867  CB  ASP B 116      90.957  74.539  25.648  1.00 83.07           C  
ATOM    868  CG  ASP B 116      90.141  75.825  25.778  1.00 83.07           C  
ATOM    869  OD1 ASP B 116      89.646  76.091  26.883  1.00 83.07           O  
ATOM    870  OD2 ASP B 116      89.931  76.632  24.848  1.00 83.07           O1-
ATOM    871  N   SER B 117      92.506  72.260  24.033  1.00 83.07           N  
ATOM    872  CA  SER B 117      93.320  71.041  23.977  1.00 83.07           C  
ATOM    873  C   SER B 117      94.531  71.171  23.053  1.00 83.07           C  
ATOM    874  O   SER B 117      95.484  70.402  23.164  1.00 83.07           O  
ATOM    875  CB  SER B 117      92.468  69.846  23.536  1.00 83.07           C  
ATOM    876  OG  SER B 117      91.572  69.444  24.562  1.00 83.07           O  
ATOM    877  N   VAL B 118      94.476  72.119  22.129  1.00 83.07           N  
ATOM    878  CA  VAL B 118      95.596  72.384  21.245  1.00 83.07           C  
ATOM    879  C   VAL B 118      96.433  73.429  21.956  1.00 83.07           C  
ATOM    880  O   VAL B 118      97.607  73.213  22.238  1.00 83.07           O  
ATOM    881  CB  VAL B 118      95.128  72.940  19.892  1.00 83.07           C  
ATOM    882  CG1 VAL B 118      96.313  73.365  19.022  1.00 83.07           C  
ATOM    883  CG2 VAL B 118      94.271  71.923  19.179  1.00 83.07           C  
ATOM    884  N   LEU B 119      95.798  74.557  22.258  1.00 83.07           N  
ATOM    885  CA  LEU B 119      96.420  75.665  22.955  1.00 83.07           C  
ATOM    886  C   LEU B 119      97.247  75.143  24.111  1.00 83.07           C  
ATOM    887  O   LEU B 119      98.351  75.631  24.373  1.00 83.07           O  
ATOM    888  CB  LEU B 119      95.337  76.597  23.467  1.00 83.07           C  
ATOM    889  CG  LEU B 119      95.706  78.061  23.618  1.00 83.07           C  
ATOM    890  CD1 LEU B 119      95.548  78.773  22.297  1.00 83.07           C  
ATOM    891  CD2 LEU B 119      94.837  78.699  24.700  1.00 83.07           C  
ATOM    892  N   ASP B 120      96.721  74.134  24.798  1.00 83.07           N  
ATOM    893  CA  ASP B 120      97.484  73.575  25.906  1.00 83.07           C  
ATOM    894  C   ASP B 120      98.512  72.493  25.618  1.00 83.07           C  
ATOM    895  O   ASP B 120      99.024  71.821  26.512  1.00 83.07           O  
ATOM    896  CB  ASP B 120      96.849  73.721  27.325  1.00 83.07           C  
ATOM    897  CG  ASP B 120      95.859  72.672  27.761  1.00 83.07           C  
ATOM    898  OD1 ASP B 120      94.642  72.831  27.518  1.00 83.07           O  
ATOM    899  OD2 ASP B 120      96.196  71.796  28.574  1.00 83.07           O1-
ATOM    900  N   VAL B 121      98.834  72.387  24.335  1.00 83.07           N  
ATOM    901  CA  VAL B 121      99.878  71.497  23.859  1.00 83.07           C  
ATOM    902  C   VAL B 121     100.931  72.393  23.226  1.00 83.07           C  
ATOM    903  O   VAL B 121     102.116  72.065  23.230  1.00 83.07           O  
ATOM    904  CB  VAL B 121      99.342  70.393  22.926  1.00 83.07           C  
ATOM    905  CG1 VAL B 121     100.421  69.887  21.951  1.00 83.07           C  
ATOM    906  CG2 VAL B 121      98.769  69.243  23.779  1.00 83.07           C  
ATOM    907  N   VAL B 122     100.497  73.538  22.702  1.00 83.07           N  
ATOM    908  CA  VAL B 122     101.447  74.519  22.211  1.00 83.07           C  
ATOM    909  C   VAL B 122     102.067  75.096  23.467  1.00 83.07           C  
ATOM    910  O   VAL B 122     103.259  75.425  23.478  1.00 83.07           O  
ATOM    911  CB  VAL B 122     100.806  75.640  21.379  1.00 83.07           C  
ATOM    912  CG1 VAL B 122      99.526  75.167  20.744  1.00 83.07           C  
ATOM    913  CG2 VAL B 122     100.566  76.891  22.209  1.00 83.07           C  
ATOM    914  N   ARG B 123     101.258  75.170  24.534  1.00 83.07           N  
ATOM    915  CA  ARG B 123     101.718  75.707  25.803  1.00 83.07           C  
ATOM    916  C   ARG B 123     102.851  74.877  26.387  1.00 83.07           C  
ATOM    917  O   ARG B 123     103.746  75.437  27.011  1.00 83.07           O  
ATOM    918  CB  ARG B 123     100.581  75.899  26.819  1.00 83.07           C  
ATOM    919  CG  ARG B 123     100.997  76.749  28.056  1.00 83.07           C  
ATOM    920  CD  ARG B 123      99.886  77.126  29.042  1.00 83.07           C  
ATOM    921  NE  ARG B 123      98.781  77.796  28.367  1.00 83.07           N  
ATOM    922  CZ  ARG B 123      97.590  77.245  28.165  1.00 83.07           C  
ATOM    923  NH1 ARG B 123      97.357  76.025  28.620  1.00 83.07           N1+
ATOM    924  NH2 ARG B 123      96.626  77.904  27.520  1.00 83.07           N  
ATOM    925  N   LYS B 124     102.831  73.560  26.178  1.00 83.07           N  
ATOM    926  CA  LYS B 124     103.891  72.696  26.725  1.00 83.07           C  
ATOM    927  C   LYS B 124     105.150  72.720  25.865  1.00 83.07           C  
ATOM    928  O   LYS B 124     106.257  72.548  26.368  1.00 83.07           O  
ATOM    929  CB  LYS B 124     103.401  71.246  26.966  1.00 83.07           C  
ATOM    930  N   GLU B 125     104.981  72.948  24.571  1.00 83.07           N  
ATOM    931  CA  GLU B 125     106.118  73.014  23.675  1.00 83.07           C  
ATOM    932  C   GLU B 125     106.852  74.314  23.868  1.00 83.07           C  
ATOM    933  O   GLU B 125     108.079  74.355  23.873  1.00 83.07           O  
ATOM    934  CB  GLU B 125     105.646  72.917  22.239  1.00 83.07           C  
ATOM    935  CG  GLU B 125     105.461  71.492  21.764  1.00 83.07           C  
ATOM    936  CD  GLU B 125     106.762  70.713  21.695  1.00 83.07           C  
ATOM    937  OE1 GLU B 125     107.837  71.295  21.964  1.00 83.07           O  
ATOM    938  OE2 GLU B 125     106.706  69.508  21.368  1.00 83.07           O1-
ATOM    939  N   SER B 126     106.071  75.373  24.034  1.00 83.07           N  
ATOM    940  CA  SER B 126     106.580  76.724  24.211  1.00 83.07           C  
ATOM    941  C   SER B 126     107.352  76.893  25.518  1.00 83.07           C  
ATOM    942  O   SER B 126     108.512  77.290  25.540  1.00 83.07           O  
ATOM    943  CB  SER B 126     105.423  77.727  24.137  1.00 83.07           C  
ATOM    944  N   GLU B 127     106.691  76.590  26.614  1.00 83.07           N  
ATOM    945  CA  GLU B 127     107.307  76.715  27.903  1.00 83.07           C  
ATOM    946  C   GLU B 127     108.492  75.764  28.023  1.00 83.07           C  
ATOM    947  O   GLU B 127     109.300  75.885  28.960  1.00 83.07           O  
ATOM    948  CB  GLU B 127     106.284  76.392  28.971  1.00 83.07           C  
ATOM    949  CG  GLU B 127     105.428  77.563  29.415  1.00 83.07           C  
ATOM    950  CD  GLU B 127     104.586  77.192  30.623  1.00 83.07           C  
ATOM    951  OE1 GLU B 127     103.383  76.889  30.429  1.00 83.07           O  
ATOM    952  OE2 GLU B 127     105.136  77.179  31.758  1.00 83.07           O1-
ATOM    953  N   SER B 128     108.593  74.807  27.099  1.00 83.07           N  
ATOM    954  CA  SER B 128     109.733  73.887  27.118  1.00 83.07           C  
ATOM    955  C   SER B 128     110.935  74.566  26.486  1.00 83.07           C  
ATOM    956  O   SER B 128     112.072  74.381  26.930  1.00 83.07           O  
ATOM    957  CB  SER B 128     109.441  72.570  26.406  1.00 83.07           C  
ATOM    958  OG  SER B 128     110.336  71.565  26.865  1.00 83.07           O  
ATOM    959  N   CYS B 129     110.657  75.356  25.455  1.00 83.07           N  
ATOM    960  CA  CYS B 129     111.663  76.146  24.769  1.00 83.07           C  
ATOM    961  C   CYS B 129     112.548  76.952  25.710  1.00 83.07           C  
ATOM    962  O   CYS B 129     112.046  77.597  26.630  1.00 83.07           O  
ATOM    963  CB  CYS B 129     110.973  77.131  23.852  1.00 83.07           C  
ATOM    964  SG  CYS B 129     110.702  76.449  22.219  1.00 83.07           S  
ATOM    965  N   ASP B 130     113.858  76.934  25.459  1.00 83.07           N  
ATOM    966  CA  ASP B 130     114.820  77.668  26.270  1.00 83.07           C  
ATOM    967  C   ASP B 130     114.634  79.200  26.136  1.00 83.07           C  
ATOM    968  O   ASP B 130     114.676  79.916  27.126  1.00 83.07           O  
ATOM    969  CB  ASP B 130     116.220  77.193  25.931  1.00 83.07           C  
ATOM    970  CG  ASP B 130     117.254  78.208  26.254  1.00 83.07           C  
ATOM    971  OD1 ASP B 130     118.087  77.958  27.156  1.00 83.07           O  
ATOM    972  OD2 ASP B 130     117.305  79.299  25.654  1.00 83.07           O1-
ATOM    973  N   CYS B 131     114.444  79.689  24.915  1.00 83.07           N  
ATOM    974  CA  CYS B 131     114.089  81.091  24.660  1.00 83.07           C  
ATOM    975  C   CYS B 131     113.224  81.172  23.377  1.00 83.07           C  
ATOM    976  O   CYS B 131     113.759  81.287  22.263  1.00 83.07           O  
ATOM    977  CB  CYS B 131     115.312  81.982  24.542  1.00 83.07           C  
ATOM    978  SG  CYS B 131     114.975  83.544  23.692  1.00 83.07           S  
ATOM    979  N   LEU B 132     111.894  81.115  23.549  1.00 83.07           N  
ATOM    980  CA  LEU B 132     110.917  81.097  22.451  1.00 83.07           C  
ATOM    981  C   LEU B 132     110.917  82.320  21.566  1.00 83.07           C  
ATOM    982  O   LEU B 132     110.721  83.421  22.035  1.00 83.07           O  
ATOM    983  CB  LEU B 132     109.506  80.901  23.002  1.00 83.07           C  
ATOM    984  CG  LEU B 132     108.377  81.054  21.973  1.00 83.07           C  
ATOM    985  CD1 LEU B 132     108.408  79.923  20.979  1.00 83.07           C  
ATOM    986  CD2 LEU B 132     107.012  81.128  22.613  1.00 83.07           C  
ATOM    987  N   GLN B 133     111.068  82.091  20.271  1.00 83.07           N  
ATOM    988  CA  GLN B 133     111.114  83.136  19.251  1.00 83.07           C  
ATOM    989  C   GLN B 133     109.752  83.531  18.719  1.00 83.07           C  
ATOM    990  O   GLN B 133     109.496  84.698  18.448  1.00 83.07           O  
ATOM    991  CB  GLN B 133     111.902  82.591  18.086  1.00 83.07           C  
ATOM    992  CG  GLN B 133     112.488  83.569  17.153  1.00 83.07           C  
ATOM    993  CD  GLN B 133     113.329  82.842  16.142  1.00 83.07           C  
ATOM    994  NE2 GLN B 133     113.359  83.346  14.915  1.00 83.07           N  
ATOM    995  OE1 GLN B 133     113.933  81.808  16.462  1.00 83.07           O  
ATOM    996  N   GLY B 134     108.894  82.540  18.534  1.00 83.07           N  
ATOM    997  CA  GLY B 134     107.574  82.772  18.004  1.00 83.07           C  
ATOM    998  C   GLY B 134     107.032  81.549  17.298  1.00 83.07           C  
ATOM    999  O   GLY B 134     107.699  80.519  17.193  1.00 83.07           O  
ATOM   1000  N   PHE B 135     105.810  81.678  16.793  1.00 83.07           N  
ATOM   1001  CA  PHE B 135     105.137  80.582  16.131  1.00 83.07           C  
ATOM   1002  C   PHE B 135     104.956  80.824  14.658  1.00 83.07           C  
ATOM   1003  O   PHE B 135     104.799  81.962  14.208  1.00 83.07           O  
ATOM   1004  CB  PHE B 135     103.764  80.395  16.741  1.00 83.07           C  
ATOM   1005  CG  PHE B 135     103.755  80.497  18.206  1.00 83.07           C  
ATOM   1006  CD1 PHE B 135     103.840  81.726  18.826  1.00 83.07           C  
ATOM   1007  CD2 PHE B 135     103.679  79.361  18.980  1.00 83.07           C  
ATOM   1008  CE1 PHE B 135     103.856  81.812  20.216  1.00 83.07           C  
ATOM   1009  CE2 PHE B 135     103.682  79.434  20.359  1.00 83.07           C  
ATOM   1010  CZ  PHE B 135     103.769  80.662  20.980  1.00 83.07           C  
ATOM   1011  N   GLN B 136     104.998  79.738  13.905  1.00 83.07           N  
ATOM   1012  CA  GLN B 136     104.668  79.789  12.498  1.00 83.07           C  
ATOM   1013  C   GLN B 136     103.589  78.707  12.252  1.00 83.07           C  
ATOM   1014  O   GLN B 136     103.713  77.577  12.762  1.00 83.07           O  
ATOM   1015  CB  GLN B 136     105.907  79.670  11.609  1.00 83.07           C  
ATOM   1016  CG  GLN B 136     106.691  78.401  11.756  1.00 83.07           C  
ATOM   1017  CD  GLN B 136     107.564  78.125  10.555  1.00 83.07           C  
ATOM   1018  NE2 GLN B 136     108.123  79.181   9.972  1.00 83.07           N  
ATOM   1019  OE1 GLN B 136     107.734  76.971  10.158  1.00 83.07           O  
ATOM   1020  N   LEU B 137     102.513  79.072  11.539  1.00 83.07           N  
ATOM   1021  CA  LEU B 137     101.412  78.150  11.240  1.00 83.07           C  
ATOM   1022  C   LEU B 137     101.135  78.048   9.744  1.00 83.07           C  
ATOM   1023  O   LEU B 137     101.259  79.031   9.021  1.00 83.07           O  
ATOM   1024  CB  LEU B 137     100.156  78.571  11.989  1.00 83.07           C  
ATOM   1025  CG  LEU B 137      98.845  78.533  11.213  1.00 83.07           C  
ATOM   1026  CD1 LEU B 137      98.087  77.343  11.663  1.00 83.07           C  
ATOM   1027  CD2 LEU B 137      98.004  79.802  11.387  1.00 83.07           C  
ATOM   1028  N   THR B 138     100.781  76.849   9.292  1.00 83.07           N  
ATOM   1029  CA  THR B 138     100.462  76.589   7.890  1.00 83.07           C  
ATOM   1030  C   THR B 138      99.024  76.168   7.860  1.00 83.07           C  
ATOM   1031  O   THR B 138      98.612  75.363   8.692  1.00 83.07           O  
ATOM   1032  CB  THR B 138     101.282  75.430   7.349  1.00 83.07           C  
ATOM   1033  CG2 THR B 138     102.608  75.907   6.827  1.00 83.07           C  
ATOM   1034  OG1 THR B 138     101.632  74.557   8.431  1.00 83.07           O  
ATOM   1035  N   HIS B 139      98.278  76.686   6.883  1.00 83.07           N  
ATOM   1036  CA  HIS B 139      96.839  76.461   6.738  1.00 83.07           C  
ATOM   1037  C   HIS B 139      96.353  77.103   5.461  1.00 83.07           C  
ATOM   1038  O   HIS B 139      97.063  77.917   4.879  1.00 83.07           O  
ATOM   1039  CB  HIS B 139      96.104  77.177   7.869  1.00 83.07           C  
ATOM   1040  CG  HIS B 139      96.193  78.672   7.794  1.00 83.07           C  
ATOM   1041  CD2 HIS B 139      95.242  79.628   7.891  1.00 83.07           C  
ATOM   1042  ND1 HIS B 139      97.378  79.338   7.585  1.00 83.07           N  
ATOM   1043  CE1 HIS B 139      97.159  80.638   7.567  1.00 83.07           C  
ATOM   1044  NE2 HIS B 139      95.869  80.840   7.744  1.00 83.07           N  
ATOM   1045  N   SER B 140      95.124  76.776   5.054  1.00 83.07           N  
ATOM   1046  CA  SER B 140      94.482  77.372   3.863  1.00 83.07           C  
ATOM   1047  C   SER B 140      93.486  78.460   4.252  1.00 83.07           C  
ATOM   1048  O   SER B 140      92.889  78.402   5.313  1.00 83.07           O  
ATOM   1049  CB  SER B 140      93.784  76.303   3.000  1.00 83.07           C  
ATOM   1050  OG  SER B 140      93.122  75.297   3.772  1.00 83.07           O  
ATOM   1051  N   LEU B 141      93.297  79.446   3.396  1.00 83.07           N  
ATOM   1052  CA  LEU B 141      92.362  80.514   3.714  1.00 83.07           C  
ATOM   1053  C   LEU B 141      90.945  80.219   3.274  1.00 83.07           C  
ATOM   1054  O   LEU B 141      90.007  80.866   3.740  1.00 83.07           O  
ATOM   1055  CB  LEU B 141      92.819  81.812   3.093  1.00 83.07           C  
ATOM   1056  CG  LEU B 141      93.440  82.803   4.068  1.00 83.07           C  
ATOM   1057  CD1 LEU B 141      94.102  82.100   5.279  1.00 83.07           C  
ATOM   1058  CD2 LEU B 141      94.421  83.720   3.311  1.00 83.07           C  
ATOM   1059  N   GLY B 142      90.820  79.274   2.339  1.00 83.07           N  
ATOM   1060  CA  GLY B 142      89.548  78.773   1.833  1.00 83.07           C  
ATOM   1061  C   GLY B 142      89.233  77.574   2.698  1.00 83.07           C  
ATOM   1062  O   GLY B 142      90.100  77.129   3.460  1.00 83.07           O  
ATOM   1063  N   GLY B 143      88.029  77.023   2.615  1.00 83.07           N  
ATOM   1064  CA  GLY B 143      87.722  75.924   3.525  1.00 83.07           C  
ATOM   1065  C   GLY B 143      87.726  76.400   4.991  1.00 83.07           C  
ATOM   1066  O   GLY B 143      87.900  77.596   5.244  1.00 83.07           O  
ATOM   1067  N   GLY B 144      87.579  75.498   5.964  1.00 83.07           N  
ATOM   1068  CA  GLY B 144      87.430  75.973   7.327  1.00 83.07           C  
ATOM   1069  C   GLY B 144      88.131  75.360   8.517  1.00 83.07           C  
ATOM   1070  O   GLY B 144      88.365  76.056   9.514  1.00 83.07           O  
ATOM   1071  N   THR B 145      88.475  74.080   8.443  1.00 83.07           N  
ATOM   1072  CA  THR B 145      89.121  73.416   9.587  1.00 83.07           C  
ATOM   1073  C   THR B 145      90.539  73.932   9.901  1.00 83.07           C  
ATOM   1074  O   THR B 145      91.227  73.381  10.740  1.00 83.07           O  
ATOM   1075  CB  THR B 145      89.070  71.839   9.464  1.00 83.07           C  
ATOM   1076  CG2 THR B 145      87.884  71.375   8.635  1.00 83.07           C  
ATOM   1077  OG1 THR B 145      90.180  71.348   8.705  1.00 83.07           O  
ATOM   1078  N   GLY B 146      90.951  75.006   9.244  1.00 83.07           N  
ATOM   1079  CA  GLY B 146      92.271  75.551   9.433  1.00 83.07           C  
ATOM   1080  C   GLY B 146      92.262  77.008   9.086  1.00 83.07           C  
ATOM   1081  O   GLY B 146      93.136  77.751   9.468  1.00 83.07           O  
ATOM   1082  N   SER B 147      91.278  77.435   8.332  1.00 83.07           N  
ATOM   1083  CA  SER B 147      91.198  78.835   8.010  1.00 83.07           C  
ATOM   1084  C   SER B 147      90.347  79.508   9.058  1.00 83.07           C  
ATOM   1085  O   SER B 147      90.386  80.721   9.225  1.00 83.07           O  
ATOM   1086  CB  SER B 147      90.532  79.006   6.660  1.00 83.07           C  
ATOM   1087  OG  SER B 147      89.377  79.825   6.781  1.00 83.07           O  
ATOM   1088  N   GLY B 148      89.549  78.696   9.738  1.00 83.07           N  
ATOM   1089  CA  GLY B 148      88.616  79.174  10.737  1.00 83.07           C  
ATOM   1090  C   GLY B 148      89.101  78.843  12.117  1.00 83.07           C  
ATOM   1091  O   GLY B 148      88.958  79.658  13.031  1.00 83.07           O  
ATOM   1092  N   MET B 149      89.653  77.644  12.280  1.00 83.07           N  
ATOM   1093  CA  MET B 149      90.226  77.297  13.563  1.00 83.07           C  
ATOM   1094  C   MET B 149      91.567  78.013  13.652  1.00 83.07           C  
ATOM   1095  O   MET B 149      91.923  78.583  14.679  1.00 83.07           O  
ATOM   1096  CB  MET B 149      90.401  75.798  13.720  1.00 83.07           C  
ATOM   1097  CG  MET B 149      91.360  75.453  14.846  1.00 83.07           C  
ATOM   1098  SD  MET B 149      91.131  73.874  15.663  1.00 83.07           S  
ATOM   1099  CE  MET B 149      89.448  73.960  16.099  1.00 83.07           C  
ATOM   1100  N   GLY B 150      92.291  77.996  12.543  1.00 83.07           N  
ATOM   1101  CA  GLY B 150      93.587  78.633  12.458  1.00 83.07           C  
ATOM   1102  C   GLY B 150      93.523  80.074  12.880  1.00 83.07           C  
ATOM   1103  O   GLY B 150      94.164  80.446  13.858  1.00 83.07           O  
ATOM   1104  N   THR B 151      92.744  80.880  12.166  1.00 83.07           N  
ATOM   1105  CA  THR B 151      92.617  82.286  12.521  1.00 83.07           C  
ATOM   1106  C   THR B 151      92.219  82.454  13.969  1.00 83.07           C  
ATOM   1107  O   THR B 151      92.474  83.519  14.544  1.00 83.07           O  
ATOM   1108  CB  THR B 151      91.615  82.991  11.651  1.00 83.07           C  
ATOM   1109  CG2 THR B 151      92.252  83.331  10.342  1.00 83.07           C  
ATOM   1110  OG1 THR B 151      90.579  82.078  11.289  1.00 83.07           O  
ATOM   1111  N   LEU B 152      91.591  81.412  14.536  1.00 83.07           N  
ATOM   1112  CA  LEU B 152      91.200  81.396  15.947  1.00 83.07           C  
ATOM   1113  C   LEU B 152      92.412  81.077  16.798  1.00 83.07           C  
ATOM   1114  O   LEU B 152      92.739  81.822  17.727  1.00 83.07           O  
ATOM   1115  CB  LEU B 152      90.078  80.388  16.241  1.00 83.07           C  
ATOM   1116  CG  LEU B 152      89.681  80.140  17.710  1.00 83.07           C  
ATOM   1117  CD1 LEU B 152      89.385  81.436  18.462  1.00 83.07           C  
ATOM   1118  CD2 LEU B 152      88.485  79.226  17.821  1.00 83.07           C  
ATOM   1119  N   LEU B 153      93.074  79.967  16.478  1.00 83.07           N  
ATOM   1120  CA  LEU B 153      94.266  79.556  17.205  1.00 83.07           C  
ATOM   1121  C   LEU B 153      95.154  80.755  17.402  1.00 83.07           C  
ATOM   1122  O   LEU B 153      95.568  81.010  18.535  1.00 83.07           O  
ATOM   1123  CB  LEU B 153      95.038  78.458  16.473  1.00 83.07           C  
ATOM   1124  CG  LEU B 153      94.810  77.043  17.001  1.00 83.07           C  
ATOM   1125  CD1 LEU B 153      95.386  76.034  16.027  1.00 83.07           C  
ATOM   1126  CD2 LEU B 153      95.406  76.855  18.381  1.00 83.07           C  
ATOM   1127  N   ILE B 154      95.393  81.516  16.322  1.00 83.07           N  
ATOM   1128  CA  ILE B 154      96.292  82.674  16.395  1.00 83.07           C  
ATOM   1129  C   ILE B 154      95.747  83.821  17.239  1.00 83.07           C  
ATOM   1130  O   ILE B 154      96.492  84.459  17.988  1.00 83.07           O  
ATOM   1131  CB  ILE B 154      96.842  83.125  15.017  1.00 83.07           C  
ATOM   1132  CG1 ILE B 154      96.135  84.352  14.515  1.00 83.07           C  
ATOM   1133  CG2 ILE B 154      96.752  82.036  13.971  1.00 83.07           C  
ATOM   1134  CD1 ILE B 154      96.616  84.700  13.181  1.00 83.07           C  
ATOM   1135  N   SER B 155      94.445  84.046  17.162  1.00 83.07           N  
ATOM   1136  CA  SER B 155      93.832  85.097  17.965  1.00 83.07           C  
ATOM   1137  C   SER B 155      94.002  84.774  19.427  1.00 83.07           C  
ATOM   1138  O   SER B 155      93.909  85.650  20.277  1.00 83.07           O  
ATOM   1139  CB  SER B 155      92.343  85.242  17.644  1.00 83.07           C  
ATOM   1140  OG  SER B 155      92.044  86.567  17.232  1.00 83.07           O  
ATOM   1141  N   LYS B 156      94.240  83.503  19.707  1.00 83.07           N  
ATOM   1142  CA  LYS B 156      94.383  83.051  21.070  1.00 83.07           C  
ATOM   1143  C   LYS B 156      95.831  82.892  21.439  1.00 83.07           C  
ATOM   1144  O   LYS B 156      96.142  82.760  22.624  1.00 83.07           O  
ATOM   1145  CB  LYS B 156      93.606  81.755  21.322  1.00 83.07           C  
ATOM   1146  CG  LYS B 156      92.260  81.976  22.037  1.00 83.07           C  
ATOM   1147  CD  LYS B 156      91.798  80.790  22.870  1.00 83.07           C  
ATOM   1148  CE  LYS B 156      91.786  81.124  24.355  1.00 83.07           C  
ATOM   1149  NZ  LYS B 156      90.407  81.405  24.826  1.00 83.07           N1+
ATOM   1150  N   ILE B 157      96.719  82.904  20.446  1.00 83.07           N  
ATOM   1151  CA  ILE B 157      98.148  82.838  20.743  1.00 83.07           C  
ATOM   1152  C   ILE B 157      98.578  84.242  21.206  1.00 83.07           C  
ATOM   1153  O   ILE B 157      99.180  84.385  22.272  1.00 83.07           O  
ATOM   1154  CB  ILE B 157      98.956  82.274  19.573  1.00 83.07           C  
ATOM   1155  CG1 ILE B 157      98.546  80.827  19.297  1.00 83.07           C  
ATOM   1156  CG2 ILE B 157     100.407  82.306  19.887  1.00 83.07           C  
ATOM   1157  CD1 ILE B 157      99.141  79.805  20.196  1.00 83.07           C  
ATOM   1158  N   ARG B 158      98.245  85.275  20.424  1.00 83.07           N  
ATOM   1159  CA  ARG B 158      98.437  86.650  20.879  1.00 83.07           C  
ATOM   1160  C   ARG B 158      97.449  86.645  22.015  1.00 83.07           C  
ATOM   1161  O   ARG B 158      96.378  86.074  21.869  1.00 83.07           O  
ATOM   1162  CB  ARG B 158      97.982  87.658  19.830  1.00 83.07           C  
ATOM   1163  CG  ARG B 158      98.808  87.652  18.572  1.00 83.07           C  
ATOM   1164  CD  ARG B 158     100.231  88.293  18.716  1.00 83.07           C  
ATOM   1165  NE  ARG B 158     100.586  89.214  17.626  1.00 83.07           N  
ATOM   1166  CZ  ARG B 158      99.808  90.228  17.197  1.00 83.07           C  
ATOM   1167  NH1 ARG B 158      98.600  90.482  17.757  1.00 83.07           N1+
ATOM   1168  NH2 ARG B 158     100.239  90.985  16.181  1.00 83.07           N  
ATOM   1169  N   GLU B 159      97.775  87.251  23.143  1.00 83.07           N  
ATOM   1170  CA  GLU B 159      96.911  87.233  24.338  1.00 83.07           C  
ATOM   1171  C   GLU B 159      97.682  86.400  25.320  1.00 83.07           C  
ATOM   1172  O   GLU B 159      97.849  86.796  26.477  1.00 83.07           O  
ATOM   1173  CB  GLU B 159      95.501  86.633  24.138  1.00 83.07           C  
ATOM   1174  CG  GLU B 159      94.468  87.068  25.194  1.00 83.07           C  
ATOM   1175  CD  GLU B 159      93.218  86.169  25.309  1.00 83.07           C  
ATOM   1176  OE1 GLU B 159      92.369  86.400  26.218  1.00 83.07           O  
ATOM   1177  OE2 GLU B 159      93.061  85.231  24.494  1.00 83.07           O1-
ATOM   1178  N   GLU B 160      98.164  85.244  24.871  1.00 83.07           N  
ATOM   1179  CA  GLU B 160      98.995  84.420  25.745  1.00 83.07           C  
ATOM   1180  C   GLU B 160     100.459  84.666  25.443  1.00 83.07           C  
ATOM   1181  O   GLU B 160     101.321  84.296  26.231  1.00 83.07           O  
ATOM   1182  CB  GLU B 160      98.670  82.936  25.599  1.00 83.07           C  
ATOM   1183  CG  GLU B 160      98.846  82.146  26.895  1.00 83.07           C  
ATOM   1184  CD  GLU B 160      98.842  80.639  26.676  1.00 83.07           C  
ATOM   1185  OE1 GLU B 160      99.681  79.966  27.317  1.00 83.07           O  
ATOM   1186  OE2 GLU B 160      98.008  80.130  25.877  1.00 83.07           O1-
ATOM   1187  N   TYR B 161     100.709  85.297  24.294  1.00 83.07           N  
ATOM   1188  CA  TYR B 161     102.045  85.580  23.807  1.00 83.07           C  
ATOM   1189  C   TYR B 161     102.083  86.861  22.968  1.00 83.07           C  
ATOM   1190  O   TYR B 161     102.464  86.802  21.795  1.00 83.07           O  
ATOM   1191  CB  TYR B 161     102.512  84.420  22.924  1.00 83.07           C  
ATOM   1192  CG  TYR B 161     102.565  83.066  23.587  1.00 83.07           C  
ATOM   1193  CD1 TYR B 161     101.518  82.165  23.476  1.00 83.07           C  
ATOM   1194  CD2 TYR B 161     103.674  82.678  24.302  1.00 83.07           C  
ATOM   1195  CE1 TYR B 161     101.579  80.918  24.086  1.00 83.07           C  
ATOM   1196  CE2 TYR B 161     103.743  81.441  24.902  1.00 83.07           C  
ATOM   1197  CZ  TYR B 161     102.703  80.574  24.790  1.00 83.07           C  
ATOM   1198  OH  TYR B 161     102.811  79.360  25.394  1.00 83.07           O  
ATOM   1199  N   PRO B 162     101.740  88.016  23.548  1.00 83.07           N  
ATOM   1200  CA  PRO B 162     101.756  89.291  22.802  1.00 83.07           C  
ATOM   1201  C   PRO B 162     103.189  89.507  22.337  1.00 83.07           C  
ATOM   1202  O   PRO B 162     103.506  89.876  21.209  1.00 83.07           O  
ATOM   1203  CB  PRO B 162     101.400  90.331  23.873  1.00 83.07           C  
ATOM   1204  CG  PRO B 162     100.835  89.579  24.986  1.00 83.07           C  
ATOM   1205  CD  PRO B 162     101.406  88.213  24.964  1.00 83.07           C  
ATOM   1206  N   ASP B 163     104.030  89.258  23.329  1.00 83.07           N  
ATOM   1207  CA  ASP B 163     105.469  89.143  23.328  1.00 83.07           C  
ATOM   1208  C   ASP B 163     106.108  88.784  22.009  1.00 83.07           C  
ATOM   1209  O   ASP B 163     106.651  89.630  21.313  1.00 83.07           O  
ATOM   1210  CB  ASP B 163     105.681  87.923  24.214  1.00 83.07           C  
ATOM   1211  CG  ASP B 163     106.853  88.038  25.101  1.00 83.07           C  
ATOM   1212  OD1 ASP B 163     107.672  87.098  25.070  1.00 83.07           O  
ATOM   1213  OD2 ASP B 163     107.022  88.989  25.894  1.00 83.07           O1-
ATOM   1214  N   ARG B 164     106.031  87.487  21.709  1.00 83.07           N  
ATOM   1215  CA  ARG B 164     106.615  86.851  20.536  1.00 83.07           C  
ATOM   1216  C   ARG B 164     105.822  87.145  19.266  1.00 83.07           C  
ATOM   1217  O   ARG B 164     104.702  87.656  19.334  1.00 83.07           O  
ATOM   1218  CB  ARG B 164     106.776  85.337  20.794  1.00 83.07           C  
ATOM   1219  CG  ARG B 164     107.050  84.940  22.277  1.00 83.07           C  
ATOM   1220  CD  ARG B 164     108.382  85.417  22.864  1.00 83.07           C  
ATOM   1221  NE  ARG B 164     109.001  86.491  22.066  1.00 83.07           N  
ATOM   1222  CZ  ARG B 164     110.107  87.196  22.389  1.00 83.07           C  
ATOM   1223  NH1 ARG B 164     110.758  86.972  23.531  1.00 83.07           N1+
ATOM   1224  NH2 ARG B 164     110.574  88.135  21.558  1.00 83.07           N  
ATOM   1225  N   ILE B 165     106.405  86.826  18.110  1.00 83.07           N  
ATOM   1226  CA  ILE B 165     105.747  87.116  16.834  1.00 83.07           C  
ATOM   1227  C   ILE B 165     105.088  85.942  16.114  1.00 83.07           C  
ATOM   1228  O   ILE B 165     105.499  84.792  16.224  1.00 83.07           O  
ATOM   1229  CB  ILE B 165     106.650  87.920  15.873  1.00 83.07           C  
ATOM   1230  CG1 ILE B 165     107.759  87.057  15.330  1.00 83.07           C  
ATOM   1231  CG2 ILE B 165     107.209  89.173  16.545  1.00 83.07           C  
ATOM   1232  CD1 ILE B 165     108.101  87.459  13.971  1.00 83.07           C  
ATOM   1233  N   MET B 166     104.054  86.300  15.359  1.00 83.07           N  
ATOM   1234  CA  MET B 166     103.185  85.401  14.602  1.00 83.07           C  
ATOM   1235  C   MET B 166     103.468  85.297  13.097  1.00 83.07           C  
ATOM   1236  O   MET B 166     103.301  86.249  12.330  1.00 83.07           O  
ATOM   1237  CB  MET B 166     101.758  85.882  14.797  1.00 83.07           C  
ATOM   1238  CG  MET B 166     100.872  84.890  15.493  1.00 83.07           C  
ATOM   1239  SD  MET B 166     100.903  83.266  14.642  1.00 83.07           S  
ATOM   1240  CE  MET B 166     101.212  82.275  16.165  1.00 83.07           C  
ATOM   1241  N   ASN B 167     103.850  84.109  12.675  1.00 83.07           N  
ATOM   1242  CA  ASN B 167     104.221  83.897  11.300  1.00 83.07           C  
ATOM   1243  C   ASN B 167     103.345  82.871  10.600  1.00 83.07           C  
ATOM   1244  O   ASN B 167     103.061  81.820  11.161  1.00 83.07           O  
ATOM   1245  CB  ASN B 167     105.669  83.443  11.273  1.00 83.07           C  
ATOM   1246  CG  ASN B 167     106.348  83.798   9.988  1.00 83.07           C  
ATOM   1247  ND2 ASN B 167     107.327  82.980   9.567  1.00 83.07           N  
ATOM   1248  OD1 ASN B 167     105.985  84.796   9.355  1.00 83.07           O  
ATOM   1249  N   THR B 168     102.893  83.164   9.388  1.00 83.07           N  
ATOM   1250  CA  THR B 168     102.064  82.190   8.700  1.00 83.07           C  
ATOM   1251  C   THR B 168     102.354  82.071   7.228  1.00 83.07           C  
ATOM   1252  O   THR B 168     102.781  83.025   6.570  1.00 83.07           O  
ATOM   1253  CB  THR B 168     100.536  82.469   8.854  1.00 83.07           C  
ATOM   1254  CG2 THR B 168     100.134  82.779  10.289  1.00 83.07           C  
ATOM   1255  OG1 THR B 168     100.173  83.649   8.124  1.00 83.07           O  
ATOM   1256  N   PHE B 169     102.097  80.869   6.733  1.00 83.07           N  
ATOM   1257  CA  PHE B 169     102.152  80.559   5.336  1.00 83.07           C  
ATOM   1258  C   PHE B 169     100.711  80.212   5.099  1.00 83.07           C  
ATOM   1259  O   PHE B 169     100.238  79.218   5.624  1.00 83.07           O  
ATOM   1260  CB  PHE B 169     102.984  79.314   5.108  1.00 83.07           C  
ATOM   1261  CG  PHE B 169     104.432  79.508   5.354  1.00 83.07           C  
ATOM   1262  CD1 PHE B 169     104.994  79.133   6.554  1.00 83.07           C  
ATOM   1263  CD2 PHE B 169     105.239  80.064   4.387  1.00 83.07           C  
ATOM   1264  CE1 PHE B 169     106.352  79.313   6.789  1.00 83.07           C  
ATOM   1265  CE2 PHE B 169     106.585  80.252   4.611  1.00 83.07           C  
ATOM   1266  CZ  PHE B 169     107.145  79.870   5.817  1.00 83.07           C  
ATOM   1267  N   SER B 170      99.998  81.050   4.355  1.00 83.07           N  
ATOM   1268  CA  SER B 170      98.577  80.827   4.053  1.00 83.07           C  
ATOM   1269  C   SER B 170      98.270  80.687   2.535  1.00 83.07           C  
ATOM   1270  O   SER B 170      98.529  81.596   1.740  1.00 83.07           O  
ATOM   1271  CB  SER B 170      97.721  81.931   4.690  1.00 83.07           C  
ATOM   1272  OG  SER B 170      98.329  82.475   5.851  1.00 83.07           O  
ATOM   1273  N   VAL B 171      97.730  79.542   2.133  1.00 83.07           N  
ATOM   1274  CA  VAL B 171      97.387  79.318   0.736  1.00 83.07           C  
ATOM   1275  C   VAL B 171      96.072  79.985   0.393  1.00 83.07           C  
ATOM   1276  O   VAL B 171      95.024  79.518   0.809  1.00 83.07           O  
ATOM   1277  CB  VAL B 171      97.241  77.833   0.411  1.00 83.07           C  
ATOM   1278  CG1 VAL B 171      98.422  77.356  -0.347  1.00 83.07           C  
ATOM   1279  CG2 VAL B 171      97.106  77.037   1.657  1.00 83.07           C  
ATOM   1280  N   VAL B 172      96.122  81.077  -0.355  1.00 83.07           N  
ATOM   1281  CA  VAL B 172      94.921  81.785  -0.777  1.00 83.07           C  
ATOM   1282  C   VAL B 172      94.335  81.042  -1.995  1.00 83.07           C  
ATOM   1283  O   VAL B 172      95.059  80.745  -2.928  1.00 83.07           O  
ATOM   1284  CB  VAL B 172      95.250  83.256  -1.077  1.00 83.07           C  
ATOM   1285  CG1 VAL B 172      94.075  83.970  -1.737  1.00 83.07           C  
ATOM   1286  CG2 VAL B 172      95.679  83.980   0.196  1.00 83.07           C  
ATOM   1287  N   PRO B 173      93.030  80.769  -2.007  1.00 83.07           N  
ATOM   1288  CA  PRO B 173      92.432  79.929  -3.046  1.00 83.07           C  
ATOM   1289  C   PRO B 173      91.911  80.658  -4.281  1.00 83.07           C  
ATOM   1290  O   PRO B 173      91.765  81.884  -4.288  1.00 83.07           O  
ATOM   1291  CB  PRO B 173      91.290  79.258  -2.304  1.00 83.07           C  
ATOM   1292  CG  PRO B 173      90.904  80.258  -1.247  1.00 83.07           C  
ATOM   1293  CD  PRO B 173      92.004  81.256  -1.073  1.00 83.07           C  
ATOM   1294  N   SER B 174      91.615  79.872  -5.314  1.00 83.07           N  
ATOM   1295  CA  SER B 174      91.203  80.387  -6.616  1.00 83.07           C  
ATOM   1296  C   SER B 174      89.989  79.675  -7.148  1.00 83.07           C  
ATOM   1297  O   SER B 174      89.592  78.644  -6.604  1.00 83.07           O  
ATOM   1298  CB  SER B 174      92.328  80.153  -7.626  1.00 83.07           C  
ATOM   1299  OG  SER B 174      91.939  79.228  -8.640  1.00 83.07           O  
ATOM   1300  N   PRO B 175      89.426  80.214  -8.235  1.00 83.07           N  
ATOM   1301  CA  PRO B 175      88.261  79.607  -8.903  1.00 83.07           C  
ATOM   1302  C   PRO B 175      88.581  78.269  -9.595  1.00 83.07           C  
ATOM   1303  O   PRO B 175      87.685  77.422  -9.663  1.00 83.07           O  
ATOM   1304  CB  PRO B 175      87.830  80.666  -9.939  1.00 83.07           C  
ATOM   1305  CG  PRO B 175      88.639  81.910  -9.643  1.00 83.07           C  
ATOM   1306  CD  PRO B 175      89.854  81.466  -8.895  1.00 83.07           C  
ATOM   1307  N   LYS B 176      89.803  78.102 -10.119  1.00 83.07           N  
ATOM   1308  CA  LYS B 176      90.234  76.834 -10.737  1.00 83.07           C  
ATOM   1309  C   LYS B 176      90.992  76.068  -9.646  1.00 83.07           C  
ATOM   1310  O   LYS B 176      91.733  76.679  -8.852  1.00 83.07           O  
ATOM   1311  CB  LYS B 176      91.104  77.047 -11.987  1.00 83.07           C  
ATOM   1312  CG  LYS B 176      92.217  78.110 -11.810  1.00 83.07           C  
ATOM   1313  CD  LYS B 176      93.333  78.008 -12.868  1.00 83.07           C  
ATOM   1314  CE  LYS B 176      93.067  78.887 -14.113  1.00 83.07           C  
ATOM   1315  NZ  LYS B 176      94.267  79.694 -14.512  1.00 83.07           N1+
ATOM   1316  N   VAL B 177      90.785  74.747  -9.599  1.00 83.07           N  
ATOM   1317  CA  VAL B 177      91.371  73.864  -8.562  1.00 83.07           C  
ATOM   1318  C   VAL B 177      90.903  74.277  -7.140  1.00 83.07           C  
ATOM   1319  O   VAL B 177      91.654  74.808  -6.309  1.00 83.07           O  
ATOM   1320  CB  VAL B 177      92.913  73.610  -8.781  1.00 83.07           C  
ATOM   1321  CG1 VAL B 177      93.738  73.595  -7.460  1.00 83.07           C  
ATOM   1322  CG2 VAL B 177      93.106  72.315  -9.626  1.00 83.07           C  
ATOM   1323  N   SER B 178      89.612  74.025  -6.929  1.00 83.07           N  
ATOM   1324  CA  SER B 178      88.862  74.387  -5.734  1.00 83.07           C  
ATOM   1325  C   SER B 178      87.727  73.380  -5.518  1.00 83.07           C  
ATOM   1326  O   SER B 178      87.080  72.946  -6.484  1.00 83.07           O  
ATOM   1327  CB  SER B 178      88.241  75.771  -5.944  1.00 83.07           C  
ATOM   1328  OG  SER B 178      87.007  75.697  -6.658  1.00 83.07           O  
ATOM   1329  N   ASP B 179      87.447  73.050  -4.257  1.00 83.07           N  
ATOM   1330  CA  ASP B 179      86.389  72.075  -3.932  1.00 83.07           C  
ATOM   1331  C   ASP B 179      85.028  72.693  -3.538  1.00 83.07           C  
ATOM   1332  O   ASP B 179      83.992  72.015  -3.630  1.00 83.07           O  
ATOM   1333  CB  ASP B 179      86.854  71.082  -2.836  1.00 83.07           C  
ATOM   1334  CG  ASP B 179      88.369  71.172  -2.533  1.00 83.07           C  
ATOM   1335  OD1 ASP B 179      89.177  71.046  -3.491  1.00 83.07           O  
ATOM   1336  OD2 ASP B 179      88.840  71.352  -1.372  1.00 83.07           O1-
ATOM   1337  N   THR B 180      85.039  73.975  -3.136  1.00 83.07           N  
ATOM   1338  CA  THR B 180      83.842  74.677  -2.637  1.00 83.07           C  
ATOM   1339  C   THR B 180      83.470  76.003  -3.285  1.00 83.07           C  
ATOM   1340  O   THR B 180      84.339  76.816  -3.612  1.00 83.07           O  
ATOM   1341  CB  THR B 180      84.028  74.980  -1.151  1.00 83.07           C  
ATOM   1342  CG2 THR B 180      82.685  74.998  -0.447  1.00 83.07           C  
ATOM   1343  OG1 THR B 180      84.743  73.912  -0.520  1.00 83.07           O  
ATOM   1344  N   VAL B 181      82.165  76.234  -3.404  1.00 83.07           N  
ATOM   1345  CA  VAL B 181      81.651  77.483  -3.934  1.00 83.07           C  
ATOM   1346  C   VAL B 181      81.887  78.630  -2.960  1.00 83.07           C  
ATOM   1347  O   VAL B 181      82.050  79.783  -3.370  1.00 83.07           O  
ATOM   1348  CB  VAL B 181      80.153  77.413  -4.143  1.00 83.07           C  
ATOM   1349  CG1 VAL B 181      79.786  78.086  -5.444  1.00 83.07           C  
ATOM   1350  CG2 VAL B 181      79.690  75.982  -4.135  1.00 83.07           C  
ATOM   1351  N   VAL B 182      81.931  78.302  -1.671  1.00 83.07           N  
ATOM   1352  CA  VAL B 182      82.050  79.315  -0.623  1.00 83.07           C  
ATOM   1353  C   VAL B 182      83.427  79.927  -0.357  1.00 83.07           C  
ATOM   1354  O   VAL B 182      83.490  80.971   0.275  1.00 83.07           O  
ATOM   1355  CB  VAL B 182      81.429  78.850   0.727  1.00 83.07           C  
ATOM   1356  CG1 VAL B 182      80.124  78.158   0.505  1.00 83.07           C  
ATOM   1357  CG2 VAL B 182      82.354  77.945   1.466  1.00 83.07           C  
ATOM   1358  N   GLU B 183      84.507  79.308  -0.842  1.00 83.07           N  
ATOM   1359  CA  GLU B 183      85.899  79.765  -0.583  1.00 83.07           C  
ATOM   1360  C   GLU B 183      86.090  81.273  -0.381  1.00 83.07           C  
ATOM   1361  O   GLU B 183      86.695  81.679   0.602  1.00 83.07           O  
ATOM   1362  CB  GLU B 183      86.872  79.228  -1.634  1.00 83.07           C  
ATOM   1363  CG  GLU B 183      87.283  77.780  -1.411  1.00 83.07           C  
ATOM   1364  CD  GLU B 183      87.558  77.045  -2.714  1.00 83.07           C  
ATOM   1365  OE1 GLU B 183      88.473  77.479  -3.451  1.00 83.07           O  
ATOM   1366  OE2 GLU B 183      86.873  76.038  -3.001  1.00 83.07           O1-
ATOM   1367  N   PRO B 184      85.617  82.092  -1.317  1.00 83.07           N  
ATOM   1368  CA  PRO B 184      85.631  83.550  -1.165  1.00 83.07           C  
ATOM   1369  C   PRO B 184      85.127  84.070   0.190  1.00 83.07           C  
ATOM   1370  O   PRO B 184      85.658  85.088   0.644  1.00 83.07           O  
ATOM   1371  CB  PRO B 184      84.666  84.000  -2.255  1.00 83.07           C  
ATOM   1372  CG  PRO B 184      84.029  82.720  -2.759  1.00 83.07           C  
ATOM   1373  CD  PRO B 184      85.089  81.705  -2.635  1.00 83.07           C  
ATOM   1374  N   TYR B 185      84.122  83.409   0.787  1.00 83.07           N  
ATOM   1375  CA  TYR B 185      83.556  83.773   2.103  1.00 83.07           C  
ATOM   1376  C   TYR B 185      84.573  83.411   3.159  1.00 83.07           C  
ATOM   1377  O   TYR B 185      84.932  84.228   3.994  1.00 83.07           O  
ATOM   1378  CB  TYR B 185      82.244  83.023   2.396  1.00 83.07           C  
ATOM   1379  CG  TYR B 185      80.983  83.596   1.771  1.00 83.07           C  
ATOM   1380  CD1 TYR B 185      79.763  83.487   2.402  1.00 83.07           C  
ATOM   1381  CD2 TYR B 185      81.013  84.219   0.529  1.00 83.07           C  
ATOM   1382  CE1 TYR B 185      78.623  84.005   1.826  1.00 83.07           C  
ATOM   1383  CE2 TYR B 185      79.874  84.735  -0.050  1.00 83.07           C  
ATOM   1384  CZ  TYR B 185      78.692  84.626   0.603  1.00 83.07           C  
ATOM   1385  OH  TYR B 185      77.578  85.144   0.013  1.00 83.07           O  
ATOM   1386  N   ASN B 186      85.038  82.173   3.104  1.00 83.07           N  
ATOM   1387  CA  ASN B 186      86.051  81.699   4.016  1.00 83.07           C  
ATOM   1388  C   ASN B 186      87.334  82.543   3.924  1.00 83.07           C  
ATOM   1389  O   ASN B 186      87.919  82.901   4.939  1.00 83.07           O  
ATOM   1390  CB  ASN B 186      86.375  80.232   3.728  1.00 83.07           C  
ATOM   1391  CG  ASN B 186      85.267  79.292   4.136  1.00 83.07           C  
ATOM   1392  ND2 ASN B 186      85.219  78.133   3.500  1.00 83.07           N  
ATOM   1393  OD1 ASN B 186      84.472  79.594   5.010  1.00 83.07           O  
ATOM   1394  N   ALA B 187      87.760  82.876   2.712  1.00 83.07           N  
ATOM   1395  CA  ALA B 187      88.992  83.621   2.519  1.00 83.07           C  
ATOM   1396  C   ALA B 187      88.905  85.003   3.108  1.00 83.07           C  
ATOM   1397  O   ALA B 187      89.714  85.373   3.940  1.00 83.07           O  
ATOM   1398  CB  ALA B 187      89.321  83.697   1.053  1.00 83.07           C  
ATOM   1399  N   THR B 188      87.905  85.754   2.676  1.00 83.07           N  
ATOM   1400  CA  THR B 188      87.720  87.112   3.136  1.00 83.07           C  
ATOM   1401  C   THR B 188      87.670  87.177   4.635  1.00 83.07           C  
ATOM   1402  O   THR B 188      88.236  88.083   5.234  1.00 83.07           O  
ATOM   1403  CB  THR B 188      86.417  87.660   2.607  1.00 83.07           C  
ATOM   1404  CG2 THR B 188      86.444  89.173   2.643  1.00 83.07           C  
ATOM   1405  OG1 THR B 188      86.291  87.341   1.215  1.00 83.07           O  
ATOM   1406  N   LEU B 189      86.980  86.201   5.224  1.00 83.07           N  
ATOM   1407  CA  LEU B 189      86.780  86.121   6.673  1.00 83.07           C  
ATOM   1408  C   LEU B 189      88.054  85.962   7.485  1.00 83.07           C  
ATOM   1409  O   LEU B 189      88.104  86.357   8.663  1.00 83.07           O  
ATOM   1410  CB  LEU B 189      85.796  85.010   7.037  1.00 83.07           C  
ATOM   1411  CG  LEU B 189      84.434  85.624   7.371  1.00 83.07           C  
ATOM   1412  CD1 LEU B 189      83.318  84.614   7.255  1.00 83.07           C  
ATOM   1413  CD2 LEU B 189      84.417  86.276   8.755  1.00 83.07           C  
ATOM   1414  N   SER B 190      89.073  85.388   6.847  1.00 83.07           N  
ATOM   1415  CA  SER B 190      90.358  85.141   7.486  1.00 83.07           C  
ATOM   1416  C   SER B 190      91.277  86.294   7.215  1.00 83.07           C  
ATOM   1417  O   SER B 190      91.914  86.796   8.126  1.00 83.07           O  
ATOM   1418  CB  SER B 190      91.008  83.846   6.973  1.00 83.07           C  
ATOM   1419  OG  SER B 190      90.051  82.844   6.651  1.00 83.07           O  
ATOM   1420  N   VAL B 191      91.334  86.714   5.954  1.00 83.07           N  
ATOM   1421  CA  VAL B 191      92.209  87.806   5.543  1.00 83.07           C  
ATOM   1422  C   VAL B 191      92.154  88.903   6.595  1.00 83.07           C  
ATOM   1423  O   VAL B 191      93.180  89.385   7.080  1.00 83.07           O  
ATOM   1424  CB  VAL B 191      91.817  88.339   4.150  1.00 83.07           C  
ATOM   1425  CG1 VAL B 191      92.211  89.782   3.995  1.00 83.07           C  
ATOM   1426  CG2 VAL B 191      92.491  87.519   3.071  1.00 83.07           C  
ATOM   1427  N   HIS B 192      90.927  89.252   6.959  1.00 83.07           N  
ATOM   1428  CA  HIS B 192      90.634  90.258   7.976  1.00 83.07           C  
ATOM   1429  C   HIS B 192      91.348  89.883   9.278  1.00 83.07           C  
ATOM   1430  O   HIS B 192      92.074  90.691   9.844  1.00 83.07           O  
ATOM   1431  CB  HIS B 192      89.099  90.384   8.151  1.00 83.07           C  
ATOM   1432  CG  HIS B 192      88.668  91.212   9.321  1.00 83.07           C  
ATOM   1433  CD2 HIS B 192      87.515  91.207  10.030  1.00 83.07           C  
ATOM   1434  ND1 HIS B 192      89.461  92.187   9.887  1.00 83.07           N  
ATOM   1435  CE1 HIS B 192      88.822  92.739  10.901  1.00 83.07           C  
ATOM   1436  NE2 HIS B 192      87.638  92.164  11.008  1.00 83.07           N  
ATOM   1437  N   GLN B 193      91.157  88.649   9.724  1.00 83.07           N  
ATOM   1438  CA  GLN B 193      91.797  88.182  10.928  1.00 83.07           C  
ATOM   1439  C   GLN B 193      93.315  88.291  10.792  1.00 83.07           C  
ATOM   1440  O   GLN B 193      93.962  88.840  11.686  1.00 83.07           O  
ATOM   1441  CB  GLN B 193      91.379  86.743  11.244  1.00 83.07           C  
ATOM   1442  CG  GLN B 193      91.215  86.447  12.735  1.00 83.07           C  
ATOM   1443  CD  GLN B 193      89.856  86.877  13.232  1.00 83.07           C  
ATOM   1444  NE2 GLN B 193      88.847  86.064  12.947  1.00 83.07           N  
ATOM   1445  OE1 GLN B 193      89.708  87.942  13.835  1.00 83.07           O  
ATOM   1446  N   LEU B 194      93.887  87.808   9.683  1.00 83.07           N  
ATOM   1447  CA  LEU B 194      95.353  87.848   9.505  1.00 83.07           C  
ATOM   1448  C   LEU B 194      95.878  89.255   9.661  1.00 83.07           C  
ATOM   1449  O   LEU B 194      96.786  89.496  10.456  1.00 83.07           O  
ATOM   1450  CB  LEU B 194      95.815  87.255   8.173  1.00 83.07           C  
ATOM   1451  CG  LEU B 194      95.678  85.735   8.013  1.00 83.07           C  
ATOM   1452  CD1 LEU B 194      96.014  85.335   6.593  1.00 83.07           C  
ATOM   1453  CD2 LEU B 194      96.532  84.938   8.987  1.00 83.07           C  
ATOM   1454  N   VAL B 195      95.271  90.186   8.932  1.00 83.07           N  
ATOM   1455  CA  VAL B 195      95.653  91.584   9.016  1.00 83.07           C  
ATOM   1456  C   VAL B 195      95.887  92.018  10.467  1.00 83.07           C  
ATOM   1457  O   VAL B 195      96.885  92.658  10.772  1.00 83.07           O  
ATOM   1458  CB  VAL B 195      94.621  92.505   8.310  1.00 83.07           C  
ATOM   1459  CG1 VAL B 195      94.251  93.713   9.169  1.00 83.07           C  
ATOM   1460  CG2 VAL B 195      95.158  92.961   6.974  1.00 83.07           C  
ATOM   1461  N   GLU B 196      95.014  91.599  11.370  1.00 83.07           N  
ATOM   1462  CA  GLU B 196      95.077  92.081  12.737  1.00 83.07           C  
ATOM   1463  C   GLU B 196      96.028  91.424  13.677  1.00 83.07           C  
ATOM   1464  O   GLU B 196      96.643  92.114  14.471  1.00 83.07           O  
ATOM   1465  CB  GLU B 196      93.696  92.079  13.384  1.00 83.07           C  
ATOM   1466  CG  GLU B 196      92.631  92.878  12.637  1.00 83.07           C  
ATOM   1467  CD  GLU B 196      92.799  94.396  12.739  1.00 83.07           C  
ATOM   1468  OE1 GLU B 196      93.710  94.881  13.483  1.00 83.07           O  
ATOM   1469  OE2 GLU B 196      91.995  95.105  12.063  1.00 83.07           O1-
ATOM   1470  N   ASN B 197      96.126  90.102  13.651  1.00 83.07           N  
ATOM   1471  CA  ASN B 197      97.019  89.450  14.621  1.00 83.07           C  
ATOM   1472  C   ASN B 197      98.299  88.740  14.124  1.00 83.07           C  
ATOM   1473  O   ASN B 197      98.778  87.815  14.795  1.00 83.07           O  
ATOM   1474  CB  ASN B 197      96.282  88.549  15.651  1.00 83.07           C  
ATOM   1475  CG  ASN B 197      94.766  88.637  15.574  1.00 83.07           C  
ATOM   1476  ND2 ASN B 197      94.156  87.720  14.825  1.00 83.07           N  
ATOM   1477  OD1 ASN B 197      94.147  89.480  16.226  1.00 83.07           O  
ATOM   1478  N   THR B 198      98.850  89.133  12.975  1.00 83.07           N  
ATOM   1479  CA  THR B 198     100.122  88.531  12.557  1.00 83.07           C  
ATOM   1480  C   THR B 198     101.137  89.583  12.131  1.00 83.07           C  
ATOM   1481  O   THR B 198     100.779  90.678  11.703  1.00 83.07           O  
ATOM   1482  CB  THR B 198      99.991  87.370  11.522  1.00 83.07           C  
ATOM   1483  CG2 THR B 198      98.640  86.756  11.544  1.00 83.07           C  
ATOM   1484  OG1 THR B 198     100.077  87.891  10.199  1.00 83.07           O  
ATOM   1485  N   ASP B 199     102.408  89.232  12.269  1.00 83.07           N  
ATOM   1486  CA  ASP B 199     103.491  90.148  11.975  1.00 83.07           C  
ATOM   1487  C   ASP B 199     103.928  90.011  10.537  1.00 83.07           C  
ATOM   1488  O   ASP B 199     104.173  91.024   9.895  1.00 83.07           O  
ATOM   1489  CB  ASP B 199     104.612  89.979  13.001  1.00 83.07           C  
ATOM   1490  CG  ASP B 199     104.093  90.129  14.459  1.00 83.07           C  
ATOM   1491  OD1 ASP B 199     103.552  89.147  15.037  1.00 83.07           O  
ATOM   1492  OD2 ASP B 199     104.154  91.203  15.110  1.00 83.07           O1-
ATOM   1493  N   GLU B 200     104.013  88.773  10.040  1.00 83.07           N  
ATOM   1494  CA  GLU B 200     104.292  88.501   8.619  1.00 83.07           C  
ATOM   1495  C   GLU B 200     103.477  87.318   8.114  1.00 83.07           C  
ATOM   1496  O   GLU B 200     103.352  86.309   8.818  1.00 83.07           O  
ATOM   1497  CB  GLU B 200     105.770  88.209   8.300  1.00 83.07           C  
ATOM   1498  CG  GLU B 200     106.808  88.776   9.244  1.00 83.07           C  
ATOM   1499  CD  GLU B 200     107.659  87.684   9.910  1.00 83.07           C  
ATOM   1500  OE1 GLU B 200     107.127  86.932  10.784  1.00 83.07           O  
ATOM   1501  OE2 GLU B 200     108.874  87.572   9.580  1.00 83.07           O1-
ATOM   1502  N   THR B 201     102.933  87.441   6.898  1.00 83.07           N  
ATOM   1503  CA  THR B 201     102.208  86.336   6.262  1.00 83.07           C  
ATOM   1504  C   THR B 201     102.671  86.189   4.827  1.00 83.07           C  
ATOM   1505  O   THR B 201     102.709  87.171   4.080  1.00 83.07           O  
ATOM   1506  CB  THR B 201     100.660  86.507   6.345  1.00 83.07           C  
ATOM   1507  CG2 THR B 201      99.941  85.628   5.334  1.00 83.07           C  
ATOM   1508  OG1 THR B 201     100.178  85.958   7.573  1.00 83.07           O  
ATOM   1509  N   TYR B 202     103.051  84.959   4.483  1.00 83.07           N  
ATOM   1510  CA  TYR B 202     103.487  84.594   3.142  1.00 83.07           C  
ATOM   1511  C   TYR B 202     102.259  84.151   2.406  1.00 83.07           C  
ATOM   1512  O   TYR B 202     101.491  83.379   2.956  1.00 83.07           O  
ATOM   1513  CB  TYR B 202     104.463  83.408   3.189  1.00 83.07           C  
ATOM   1514  CG  TYR B 202     105.747  83.768   3.839  1.00 83.07           C  
ATOM   1515  CD1 TYR B 202     105.878  83.684   5.205  1.00 83.07           C  
ATOM   1516  CD2 TYR B 202     106.807  84.247   3.099  1.00 83.07           C  
ATOM   1517  CE1 TYR B 202     107.022  84.055   5.827  1.00 83.07           C  
ATOM   1518  CE2 TYR B 202     107.960  84.625   3.705  1.00 83.07           C  
ATOM   1519  CZ  TYR B 202     108.063  84.528   5.085  1.00 83.07           C  
ATOM   1520  OH  TYR B 202     109.208  84.897   5.758  1.00 83.07           O  
ATOM   1521  N   CYS B 203     102.055  84.621   1.180  1.00 83.07           N  
ATOM   1522  CA  CYS B 203     100.867  84.216   0.435  1.00 83.07           C  
ATOM   1523  C   CYS B 203     101.239  83.215  -0.590  1.00 83.07           C  
ATOM   1524  O   CYS B 203     102.095  83.459  -1.421  1.00 83.07           O  
ATOM   1525  CB  CYS B 203     100.218  85.387  -0.274  1.00 83.07           C  
ATOM   1526  SG  CYS B 203      99.954  86.767   0.822  1.00 83.07           S  
ATOM   1527  N   ILE B 204     100.606  82.072  -0.533  1.00 83.07           N  
ATOM   1528  CA  ILE B 204     100.888  81.086  -1.522  1.00 83.07           C  
ATOM   1529  C   ILE B 204      99.576  81.037  -2.237  1.00 83.07           C  
ATOM   1530  O   ILE B 204      98.603  80.545  -1.693  1.00 83.07           O  
ATOM   1531  CB  ILE B 204     101.254  79.752  -0.850  1.00 83.07           C  
ATOM   1532  CG1 ILE B 204     102.574  79.881  -0.092  1.00 83.07           C  
ATOM   1533  CG2 ILE B 204     101.426  78.659  -1.880  1.00 83.07           C  
ATOM   1534  CD1 ILE B 204     102.447  80.323   1.319  1.00 83.07           C  
ATOM   1535  N   ASP B 205      99.512  81.617  -3.421  1.00 83.07           N  
ATOM   1536  CA  ASP B 205      98.274  81.577  -4.185  1.00 83.07           C  
ATOM   1537  C   ASP B 205      98.168  80.249  -4.939  1.00 83.07           C  
ATOM   1538  O   ASP B 205      99.127  79.808  -5.535  1.00 83.07           O  
ATOM   1539  CB  ASP B 205      98.208  82.778  -5.139  1.00 83.07           C  
ATOM   1540  CG  ASP B 205      96.871  82.889  -5.866  1.00 83.07           C  
ATOM   1541  OD1 ASP B 205      96.658  82.081  -6.783  1.00 83.07           O  
ATOM   1542  OD2 ASP B 205      95.983  83.742  -5.603  1.00 83.07           O1-
ATOM   1543  N   ASN B 206      97.016  79.599  -4.907  1.00 83.07           N  
ATOM   1544  CA  ASN B 206      96.874  78.347  -5.643  1.00 83.07           C  
ATOM   1545  C   ASN B 206      96.673  78.579  -7.147  1.00 83.07           C  
ATOM   1546  O   ASN B 206      96.996  77.708  -7.971  1.00 83.07           O  
ATOM   1547  CB  ASN B 206      95.768  77.470  -5.055  1.00 83.07           C  
ATOM   1548  CG  ASN B 206      96.298  76.465  -4.032  1.00 83.07           C  
ATOM   1549  ND2 ASN B 206      96.277  76.849  -2.765  1.00 83.07           N  
ATOM   1550  OD1 ASN B 206      96.713  75.363  -4.378  1.00 83.07           O  
ATOM   1551  N   GLU B 207      96.136  79.750  -7.494  1.00 83.07           N  
ATOM   1552  CA  GLU B 207      95.979  80.152  -8.892  1.00 83.07           C  
ATOM   1553  C   GLU B 207      97.392  80.242  -9.459  1.00 83.07           C  
ATOM   1554  O   GLU B 207      97.685  79.655 -10.499  1.00 83.07           O  
ATOM   1555  CB  GLU B 207      95.244  81.504  -9.006  1.00 83.07           C  
ATOM   1556  CG  GLU B 207      95.410  82.272 -10.317  1.00 83.07           C  
ATOM   1557  CD  GLU B 207      94.193  82.187 -11.221  1.00 83.07           C  
ATOM   1558  OE1 GLU B 207      93.092  81.832 -10.730  1.00 83.07           O  
ATOM   1559  OE2 GLU B 207      94.340  82.471 -12.436  1.00 83.07           O1-
ATOM   1560  N   ALA B 208      98.274  80.947  -8.752  1.00 83.07           N  
ATOM   1561  CA  ALA B 208      99.663  81.067  -9.165  1.00 83.07           C  
ATOM   1562  C   ALA B 208     100.241  79.671  -9.337  1.00 83.07           C  
ATOM   1563  O   ALA B 208     100.765  79.324 -10.392  1.00 83.07           O  
ATOM   1564  CB  ALA B 208     100.436  81.827  -8.126  1.00 83.07           C  
ATOM   1565  N   LEU B 209     100.089  78.873  -8.285  1.00 83.07           N  
ATOM   1566  CA  LEU B 209     100.581  77.502  -8.215  1.00 83.07           C  
ATOM   1567  C   LEU B 209     100.203  76.662  -9.414  1.00 83.07           C  
ATOM   1568  O   LEU B 209     101.083  76.097 -10.054  1.00 83.07           O  
ATOM   1569  CB  LEU B 209     100.100  76.833  -6.930  1.00 83.07           C  
ATOM   1570  CG  LEU B 209     101.139  76.390  -5.896  1.00 83.07           C  
ATOM   1571  CD1 LEU B 209     102.396  77.287  -5.820  1.00 83.07           C  
ATOM   1572  CD2 LEU B 209     100.433  76.329  -4.566  1.00 83.07           C  
ATOM   1573  N   TYR B 210      98.908  76.577  -9.714  1.00 83.07           N  
ATOM   1574  CA  TYR B 210      98.438  75.824 -10.881  1.00 83.07           C  
ATOM   1575  C   TYR B 210      99.089  76.335 -12.174  1.00 83.07           C  
ATOM   1576  O   TYR B 210      99.516  75.546 -13.021  1.00 83.07           O  
ATOM   1577  CB  TYR B 210      96.913  75.903 -10.993  1.00 83.07           C  
ATOM   1578  CG  TYR B 210      96.311  75.100 -12.131  1.00 83.07           C  
ATOM   1579  CD1 TYR B 210      96.683  75.338 -13.450  1.00 83.07           C  
ATOM   1580  CD2 TYR B 210      95.346  74.118 -11.886  1.00 83.07           C  
ATOM   1581  CE1 TYR B 210      96.133  74.607 -14.503  1.00 83.07           C  
ATOM   1582  CE2 TYR B 210      94.776  73.379 -12.932  1.00 83.07           C  
ATOM   1583  CZ  TYR B 210      95.180  73.630 -14.247  1.00 83.07           C  
ATOM   1584  OH  TYR B 210      94.649  72.929 -15.317  1.00 83.07           O  
ATOM   1585  N   ASP B 211      99.159  77.659 -12.301  1.00 83.07           N  
ATOM   1586  CA  ASP B 211      99.759  78.323 -13.453  1.00 83.07           C  
ATOM   1587  C   ASP B 211     101.214  77.887 -13.676  1.00 83.07           C  
ATOM   1588  O   ASP B 211     101.634  77.663 -14.806  1.00 83.07           O  
ATOM   1589  CB  ASP B 211      99.664  79.855 -13.298  1.00 83.07           C  
ATOM   1590  CG  ASP B 211      98.302  80.414 -13.731  1.00 83.07           C  
ATOM   1591  OD1 ASP B 211      97.908  80.191 -14.903  1.00 83.07           O  
ATOM   1592  OD2 ASP B 211      97.563  81.095 -12.978  1.00 83.07           O1-
ATOM   1593  N   ILE B 212     101.971  77.743 -12.595  1.00 83.07           N  
ATOM   1594  CA  ILE B 212     103.366  77.347 -12.701  1.00 83.07           C  
ATOM   1595  C   ILE B 212     103.540  75.907 -13.226  1.00 83.07           C  
ATOM   1596  O   ILE B 212     104.494  75.614 -13.943  1.00 83.07           O  
ATOM   1597  CB  ILE B 212     104.090  77.595 -11.338  1.00 83.07           C  
ATOM   1598  CG1 ILE B 212     104.666  79.015 -11.273  1.00 83.07           C  
ATOM   1599  CG2 ILE B 212     105.242  76.638 -11.120  1.00 83.07           C  
ATOM   1600  CD1 ILE B 212     103.722  80.083 -10.751  1.00 83.07           C  
ATOM   1601  N   CYS B 213     102.601  75.025 -12.906  1.00 83.07           N  
ATOM   1602  CA  CYS B 213     102.714  73.620 -13.305  1.00 83.07           C  
ATOM   1603  C   CYS B 213     102.341  73.357 -14.748  1.00 83.07           C  
ATOM   1604  O   CYS B 213     103.014  72.604 -15.446  1.00 83.07           O  
ATOM   1605  CB  CYS B 213     101.857  72.734 -12.400  1.00 83.07           C  
ATOM   1606  SG  CYS B 213     102.232  72.877 -10.626  1.00 83.07           S  
ATOM   1607  N   PHE B 214     101.256  73.982 -15.181  1.00 83.07           N  
ATOM   1608  CA  PHE B 214     100.727  73.789 -16.521  1.00 83.07           C  
ATOM   1609  C   PHE B 214     101.173  74.892 -17.476  1.00 83.07           C  
ATOM   1610  O   PHE B 214     101.680  74.581 -18.551  1.00 83.07           O  
ATOM   1611  CB  PHE B 214      99.197  73.667 -16.448  1.00 83.07           C  
ATOM   1612  CG  PHE B 214      98.516  73.410 -17.767  1.00 83.07           C  
ATOM   1613  CD1 PHE B 214      99.148  72.703 -18.792  1.00 83.07           C  
ATOM   1614  CD2 PHE B 214      97.212  73.859 -17.968  1.00 83.07           C  
ATOM   1615  CE1 PHE B 214      98.498  72.466 -20.017  1.00 83.07           C  
ATOM   1616  CE2 PHE B 214      96.548  73.628 -19.176  1.00 83.07           C  
ATOM   1617  CZ  PHE B 214      97.193  72.928 -20.207  1.00 83.07           C  
ATOM   1618  N   ARG B 215     101.005  76.164 -17.091  1.00 83.07           N  
ATOM   1619  CA  ARG B 215     101.392  77.301 -17.951  1.00 83.07           C  
ATOM   1620  C   ARG B 215     102.908  77.343 -18.251  1.00 83.07           C  
ATOM   1621  O   ARG B 215     103.335  77.863 -19.295  1.00 83.07           O  
ATOM   1622  CB  ARG B 215     100.871  78.653 -17.389  1.00 83.07           C  
ATOM   1623  N   THR B 216     103.705  76.786 -17.336  1.00 83.07           N  
ATOM   1624  CA  THR B 216     105.158  76.685 -17.513  1.00 83.07           C  
ATOM   1625  C   THR B 216     105.753  75.432 -16.855  1.00 83.07           C  
ATOM   1626  O   THR B 216     106.497  75.537 -15.870  1.00 83.07           O  
ATOM   1627  CB  THR B 216     105.947  77.991 -17.079  1.00 83.07           C  
ATOM   1628  CG2 THR B 216     106.158  78.932 -18.283  1.00 83.07           C  
ATOM   1629  OG1 THR B 216     105.203  78.765 -16.119  1.00 83.07           O  
ATOM   1630  N   LEU B 217     105.374  74.262 -17.382  1.00 83.07           N  
ATOM   1631  CA  LEU B 217     105.947  72.954 -17.001  1.00 83.07           C  
ATOM   1632  C   LEU B 217     105.240  71.690 -17.491  1.00 83.07           C  
ATOM   1633  O   LEU B 217     105.246  70.660 -16.806  1.00 83.07           O  
ATOM   1634  CB  LEU B 217     106.342  72.846 -15.527  1.00 83.07           C  
ATOM   1635  CG  LEU B 217     107.864  73.014 -15.648  1.00 83.07           C  
ATOM   1636  CD1 LEU B 217     108.454  73.639 -14.370  1.00 83.07           C  
ATOM   1637  CD2 LEU B 217     108.636  71.737 -16.169  1.00 83.07           C  
ATOM   1638  N   LYS B 218     104.675  71.791 -18.695  1.00 83.07           N  
ATOM   1639  CA  LYS B 218     103.976  70.707 -19.403  1.00 83.07           C  
ATOM   1640  C   LYS B 218     103.138  69.717 -18.554  1.00 83.07           C  
ATOM   1641  O   LYS B 218     102.586  68.757 -19.111  1.00 83.07           O  
ATOM   1642  CB  LYS B 218     104.955  69.954 -20.345  1.00 83.07           C  
ATOM   1643  N   LEU B 219     103.029  69.962 -17.239  1.00 83.07           N  
ATOM   1644  CA  LEU B 219     102.283  69.090 -16.321  1.00 83.07           C  
ATOM   1645  C   LEU B 219     100.775  69.319 -16.433  1.00 83.07           C  
ATOM   1646  O   LEU B 219     100.247  70.289 -15.869  1.00 83.07           O  
ATOM   1647  CB  LEU B 219     102.769  69.272 -14.867  1.00 83.07           C  
ATOM   1648  N   THR B 220     100.104  68.420 -17.170  1.00 83.07           N  
ATOM   1649  CA  THR B 220      98.650  68.471 -17.421  1.00 83.07           C  
ATOM   1650  C   THR B 220      97.852  68.518 -16.119  1.00 83.07           C  
ATOM   1651  O   THR B 220      97.741  69.592 -15.513  1.00 83.07           O  
ATOM   1652  CB  THR B 220      98.180  67.300 -18.326  1.00 83.07           C  
ATOM   1653  CG2 THR B 220      96.880  67.662 -19.039  1.00 83.07           C  
ATOM   1654  OG1 THR B 220      99.106  67.122 -19.403  1.00 83.07           O  
ATOM   1655  N   THR B 221      97.312  67.371 -15.689  1.00 83.07           N  
ATOM   1656  CA  THR B 221      96.542  67.295 -14.436  1.00 83.07           C  
ATOM   1657  C   THR B 221      97.436  67.532 -13.217  1.00 83.07           C  
ATOM   1658  O   THR B 221      98.167  66.638 -12.795  1.00 83.07           O  
ATOM   1659  CB  THR B 221      95.820  65.938 -14.294  1.00 83.07           C  
ATOM   1660  CG2 THR B 221      94.640  66.077 -13.316  1.00 83.07           C  
ATOM   1661  OG1 THR B 221      95.242  65.548 -15.556  1.00 83.07           O  
ATOM   1662  N   PRO B 222      97.374  68.724 -12.644  1.00 83.07           N  
ATOM   1663  CA  PRO B 222      98.217  69.036 -11.497  1.00 83.07           C  
ATOM   1664  C   PRO B 222      97.594  68.462 -10.222  1.00 83.07           C  
ATOM   1665  O   PRO B 222      96.533  68.949  -9.787  1.00 83.07           O  
ATOM   1666  CB  PRO B 222      98.212  70.569 -11.479  1.00 83.07           C  
ATOM   1667  CG  PRO B 222      97.461  70.976 -12.725  1.00 83.07           C  
ATOM   1668  CD  PRO B 222      96.503  69.859 -12.995  1.00 83.07           C  
ATOM   1669  N   THR B 223      98.230  67.430  -9.651  1.00 83.07           N  
ATOM   1670  CA  THR B 223      97.754  66.786  -8.416  1.00 83.07           C  
ATOM   1671  C   THR B 223      97.824  67.804  -7.340  1.00 83.07           C  
ATOM   1672  O   THR B 223      98.354  68.897  -7.537  1.00 83.07           O  
ATOM   1673  CB  THR B 223      98.722  65.678  -7.933  1.00 83.07           C  
ATOM   1674  CG2 THR B 223      97.969  64.503  -7.292  1.00 83.07           C  
ATOM   1675  OG1 THR B 223      99.442  65.119  -9.033  1.00 83.07           O  
ATOM   1676  N   TYR B 224      97.317  67.442  -6.176  1.00 83.07           N  
ATOM   1677  CA  TYR B 224      97.574  68.301  -5.048  1.00 83.07           C  
ATOM   1678  C   TYR B 224      99.086  68.089  -4.765  1.00 83.07           C  
ATOM   1679  O   TYR B 224      99.768  68.961  -4.220  1.00 83.07           O  
ATOM   1680  CB  TYR B 224      96.663  67.962  -3.861  1.00 83.07           C  
ATOM   1681  CG  TYR B 224      95.458  68.891  -3.733  1.00 83.07           C  
ATOM   1682  CD1 TYR B 224      94.190  68.391  -3.398  1.00 83.07           C  
ATOM   1683  CD2 TYR B 224      95.589  70.275  -3.947  1.00 83.07           C  
ATOM   1684  CE1 TYR B 224      93.084  69.247  -3.283  1.00 83.07           C  
ATOM   1685  CE2 TYR B 224      94.495  71.137  -3.842  1.00 83.07           C  
ATOM   1686  CZ  TYR B 224      93.249  70.621  -3.507  1.00 83.07           C  
ATOM   1687  OH  TYR B 224      92.184  71.490  -3.402  1.00 83.07           O  
ATOM   1688  N   GLY B 225      99.589  66.936  -5.220  1.00 83.07           N  
ATOM   1689  CA  GLY B 225     100.980  66.528  -5.087  1.00 83.07           C  
ATOM   1690  C   GLY B 225     101.921  67.507  -5.739  1.00 83.07           C  
ATOM   1691  O   GLY B 225     102.274  68.496  -5.120  1.00 83.07           O  
ATOM   1692  N   ASP B 226     102.342  67.238  -6.971  1.00 83.07           N  
ATOM   1693  CA  ASP B 226     103.202  68.184  -7.683  1.00 83.07           C  
ATOM   1694  C   ASP B 226     102.401  69.488  -7.759  1.00 83.07           C  
ATOM   1695  O   ASP B 226     101.619  69.720  -8.679  1.00 83.07           O  
ATOM   1696  CB  ASP B 226     103.645  67.659  -9.068  1.00 83.07           C  
ATOM   1697  CG  ASP B 226     102.599  66.759  -9.742  1.00 83.07           C  
ATOM   1698  OD1 ASP B 226     101.875  66.040  -9.019  1.00 83.07           O  
ATOM   1699  OD2 ASP B 226     102.443  66.700 -10.989  1.00 83.07           O1-
ATOM   1700  N   LEU B 227     102.577  70.294  -6.724  1.00 83.07           N  
ATOM   1701  CA  LEU B 227     101.880  71.549  -6.502  1.00 83.07           C  
ATOM   1702  C   LEU B 227     102.309  71.870  -5.100  1.00 83.07           C  
ATOM   1703  O   LEU B 227     102.691  72.995  -4.797  1.00 83.07           O  
ATOM   1704  CB  LEU B 227     100.368  71.379  -6.531  1.00 83.07           C  
ATOM   1705  CG  LEU B 227      99.587  72.685  -6.447  1.00 83.07           C  
ATOM   1706  CD1 LEU B 227      99.793  73.523  -7.679  1.00 83.07           C  
ATOM   1707  CD2 LEU B 227      98.139  72.375  -6.310  1.00 83.07           C  
ATOM   1708  N   ASN B 228     102.236  70.862  -4.235  1.00 83.07           N  
ATOM   1709  CA  ASN B 228     102.740  70.984  -2.875  1.00 83.07           C  
ATOM   1710  C   ASN B 228     104.251  71.045  -2.983  1.00 83.07           C  
ATOM   1711  O   ASN B 228     104.878  71.815  -2.281  1.00 83.07           O  
ATOM   1712  CB  ASN B 228     102.338  69.795  -2.005  1.00 83.07           C  
ATOM   1713  CG  ASN B 228     100.913  69.879  -1.522  1.00 83.07           C  
ATOM   1714  ND2 ASN B 228     100.191  68.772  -1.646  1.00 83.07           N  
ATOM   1715  OD1 ASN B 228     100.462  70.918  -1.038  1.00 83.07           O  
ATOM   1716  N   HIS B 229     104.817  70.243  -3.890  1.00 83.07           N  
ATOM   1717  CA  HIS B 229     106.258  70.188  -4.135  1.00 83.07           C  
ATOM   1718  C   HIS B 229     106.807  71.594  -4.334  1.00 83.07           C  
ATOM   1719  O   HIS B 229     107.921  71.872  -3.922  1.00 83.07           O  
ATOM   1720  CB  HIS B 229     106.565  69.271  -5.328  1.00 83.07           C  
ATOM   1721  CG  HIS B 229     108.005  69.260  -5.751  1.00 83.07           C  
ATOM   1722  CD2 HIS B 229     109.039  68.467  -5.383  1.00 83.07           C  
ATOM   1723  ND1 HIS B 229     108.508  70.129  -6.701  1.00 83.07           N  
ATOM   1724  CE1 HIS B 229     109.795  69.889  -6.881  1.00 83.07           C  
ATOM   1725  NE2 HIS B 229     110.141  68.883  -6.095  1.00 83.07           N  
ATOM   1726  N   LEU B 230     106.013  72.481  -4.937  1.00 83.07           N  
ATOM   1727  CA  LEU B 230     106.413  73.875  -5.136  1.00 83.07           C  
ATOM   1728  C   LEU B 230     106.454  74.599  -3.805  1.00 83.07           C  
ATOM   1729  O   LEU B 230     107.493  75.141  -3.419  1.00 83.07           O  
ATOM   1730  CB  LEU B 230     105.433  74.607  -6.039  1.00 83.07           C  
ATOM   1731  CG  LEU B 230     105.686  74.706  -7.529  1.00 83.07           C  
ATOM   1732  CD1 LEU B 230     106.649  73.621  -8.034  1.00 83.07           C  
ATOM   1733  CD2 LEU B 230     104.325  74.554  -8.166  1.00 83.07           C  
ATOM   1734  N   VAL B 231     105.313  74.602  -3.112  1.00 83.07           N  
ATOM   1735  CA  VAL B 231     105.170  75.249  -1.807  1.00 83.07           C  
ATOM   1736  C   VAL B 231     106.222  74.762  -0.830  1.00 83.07           C  
ATOM   1737  O   VAL B 231     106.856  75.551  -0.143  1.00 83.07           O  
ATOM   1738  CB  VAL B 231     103.798  74.974  -1.190  1.00 83.07           C  
ATOM   1739  CG1 VAL B 231     103.514  75.959  -0.073  1.00 83.07           C  
ATOM   1740  CG2 VAL B 231     102.720  75.042  -2.246  1.00 83.07           C  
ATOM   1741  N   SER B 232     106.397  73.447  -0.796  1.00 83.07           N  
ATOM   1742  CA  SER B 232     107.358  72.781   0.071  1.00 83.07           C  
ATOM   1743  C   SER B 232     108.788  73.225  -0.186  1.00 83.07           C  
ATOM   1744  O   SER B 232     109.552  73.411   0.753  1.00 83.07           O  
ATOM   1745  CB  SER B 232     107.251  71.262  -0.081  1.00 83.07           C  
ATOM   1746  OG  SER B 232     107.762  70.827  -1.334  1.00 83.07           O  
ATOM   1747  N   ALA B 233     109.155  73.387  -1.452  1.00 83.07           N  
ATOM   1748  CA  ALA B 233     110.505  73.825  -1.778  1.00 83.07           C  
ATOM   1749  C   ALA B 233     110.661  75.292  -1.428  1.00 83.07           C  
ATOM   1750  O   ALA B 233     111.689  75.704  -0.910  1.00 83.07           O  
ATOM   1751  CB  ALA B 233     110.812  73.590  -3.239  1.00 83.07           C  
ATOM   1752  N   THR B 234     109.620  76.069  -1.694  1.00 83.07           N  
ATOM   1753  CA  THR B 234     109.646  77.483  -1.413  1.00 83.07           C  
ATOM   1754  C   THR B 234     109.810  77.711   0.067  1.00 83.07           C  
ATOM   1755  O   THR B 234     110.608  78.526   0.486  1.00 83.07           O  
ATOM   1756  CB  THR B 234     108.366  78.134  -1.902  1.00 83.07           C  
ATOM   1757  CG2 THR B 234     108.451  79.636  -1.760  1.00 83.07           C  
ATOM   1758  OG1 THR B 234     108.265  77.954  -3.316  1.00 83.07           O  
ATOM   1759  N   MET B 235     109.072  76.966   0.865  1.00 83.07           N  
ATOM   1760  CA  MET B 235     109.139  77.140   2.301  1.00 83.07           C  
ATOM   1761  C   MET B 235     110.500  76.863   2.900  1.00 83.07           C  
ATOM   1762  O   MET B 235     110.868  77.487   3.882  1.00 83.07           O  
ATOM   1763  CB  MET B 235     108.115  76.273   2.977  1.00 83.07           C  
ATOM   1764  CG  MET B 235     106.957  77.041   3.509  1.00 83.07           C  
ATOM   1765  SD  MET B 235     105.930  75.884   4.310  1.00 83.07           S  
ATOM   1766  CE  MET B 235     105.187  75.057   2.798  1.00 83.07           C  
ATOM   1767  N   SER B 236     111.237  75.910   2.340  1.00 83.07           N  
ATOM   1768  CA  SER B 236     112.604  75.640   2.813  1.00 83.07           C  
ATOM   1769  C   SER B 236     113.505  76.833   2.463  1.00 83.07           C  
ATOM   1770  O   SER B 236     114.336  77.249   3.269  1.00 83.07           O  
ATOM   1771  CB  SER B 236     113.181  74.353   2.210  1.00 83.07           C  
ATOM   1772  OG  SER B 236     114.598  74.329   2.307  1.00 83.07           O  
ATOM   1773  N   GLY B 237     113.320  77.379   1.264  1.00 83.07           N  
ATOM   1774  CA  GLY B 237     114.090  78.517   0.826  1.00 83.07           C  
ATOM   1775  C   GLY B 237     113.857  79.712   1.716  1.00 83.07           C  
ATOM   1776  O   GLY B 237     114.779  80.395   2.108  1.00 83.07           O  
ATOM   1777  N   VAL B 238     112.615  79.948   2.072  1.00 83.07           N  
ATOM   1778  CA  VAL B 238     112.294  81.099   2.874  1.00 83.07           C  
ATOM   1779  C   VAL B 238     112.911  81.072   4.268  1.00 83.07           C  
ATOM   1780  O   VAL B 238     113.244  82.115   4.821  1.00 83.07           O  
ATOM   1781  CB  VAL B 238     110.798  81.216   2.991  1.00 83.07           C  
ATOM   1782  CG1 VAL B 238     110.449  82.238   4.003  1.00 83.07           C  
ATOM   1783  CG2 VAL B 238     110.207  81.594   1.663  1.00 83.07           C  
ATOM   1784  N   THR B 239     113.082  79.880   4.828  1.00 83.07           N  
ATOM   1785  CA  THR B 239     113.596  79.743   6.192  1.00 83.07           C  
ATOM   1786  C   THR B 239     115.089  79.533   6.308  1.00 83.07           C  
ATOM   1787  O   THR B 239     115.665  79.812   7.360  1.00 83.07           O  
ATOM   1788  CB  THR B 239     112.909  78.583   6.924  1.00 83.07           C  
ATOM   1789  CG2 THR B 239     111.413  78.780   6.949  1.00 83.07           C  
ATOM   1790  OG1 THR B 239     113.094  77.375   6.179  1.00 83.07           O  
ATOM   1791  N   THR B 240     115.711  79.031   5.245  1.00 83.07           N  
ATOM   1792  CA  THR B 240     117.155  78.714   5.248  1.00 83.07           C  
ATOM   1793  C   THR B 240     118.012  79.527   6.239  1.00 83.07           C  
ATOM   1794  O   THR B 240     118.621  78.982   7.161  1.00 83.07           O  
ATOM   1795  CB  THR B 240     117.768  78.764   3.820  1.00 83.07           C  
ATOM   1796  CG2 THR B 240     117.395  77.537   3.069  1.00 83.07           C  
ATOM   1797  OG1 THR B 240     117.141  79.795   3.053  1.00 83.07           O  
ATOM   1798  N   CYS B 241     118.030  80.835   6.052  1.00 83.07           N  
ATOM   1799  CA  CYS B 241     118.778  81.759   6.893  1.00 83.07           C  
ATOM   1800  C   CYS B 241     118.492  81.605   8.398  1.00 83.07           C  
ATOM   1801  O   CYS B 241     119.378  81.874   9.194  1.00 83.07           O  
ATOM   1802  CB  CYS B 241     118.517  83.182   6.407  1.00 83.07           C  
ATOM   1803  SG  CYS B 241     117.095  83.278   5.232  1.00 83.07           S  
ATOM   1804  N   LEU B 242     117.294  81.188   8.811  1.00 83.07           N  
ATOM   1805  CA  LEU B 242     117.143  80.940  10.244  1.00 83.07           C  
ATOM   1806  C   LEU B 242     117.473  79.539  10.690  1.00 83.07           C  
ATOM   1807  O   LEU B 242     117.619  79.310  11.878  1.00 83.07           O  
ATOM   1808  CB  LEU B 242     115.825  81.377  10.873  1.00 83.07           C  
ATOM   1809  CG  LEU B 242     114.577  81.862  10.195  1.00 83.07           C  
ATOM   1810  CD1 LEU B 242     113.549  80.753  10.218  1.00 83.07           C  
ATOM   1811  CD2 LEU B 242     114.102  83.035  11.008  1.00 83.07           C  
ATOM   1812  N   ARG B 243     117.596  78.595   9.770  1.00 83.07           N  
ATOM   1813  CA  ARG B 243     117.958  77.245  10.184  1.00 83.07           C  
ATOM   1814  C   ARG B 243     119.376  76.799   9.830  1.00 83.07           C  
ATOM   1815  O   ARG B 243     119.664  75.608   9.932  1.00 83.07           O  
ATOM   1816  CB  ARG B 243     117.041  76.183   9.570  1.00 83.07           C  
ATOM   1817  CG  ARG B 243     115.764  76.606   8.928  1.00 83.07           C  
ATOM   1818  CD  ARG B 243     114.943  75.398   8.494  1.00 83.07           C  
ATOM   1819  NE  ARG B 243     114.835  75.259   7.043  1.00 83.07           N  
ATOM   1820  CZ  ARG B 243     115.685  74.596   6.279  1.00 83.07           C  
ATOM   1821  NH1 ARG B 243     116.739  74.009   6.810  1.00 83.07           N1+
ATOM   1822  NH2 ARG B 243     115.482  74.529   4.976  1.00 83.07           N  
ATOM   1823  N   PHE B 244     120.296  77.684   9.460  1.00 83.07           N  
ATOM   1824  CA  PHE B 244     121.531  77.103   8.921  1.00 83.07           C  
ATOM   1825  C   PHE B 244     122.978  77.543   9.184  1.00 83.07           C  
ATOM   1826  O   PHE B 244     123.780  76.778   9.760  1.00 83.07           O  
ATOM   1827  CB  PHE B 244     121.383  77.012   7.404  1.00 83.07           C  
ATOM   1828  CG  PHE B 244     121.213  75.639   6.925  1.00 83.07           C  
ATOM   1829  CD1 PHE B 244     120.036  75.261   6.303  1.00 83.07           C  
ATOM   1830  CD2 PHE B 244     122.216  74.699   7.118  1.00 83.07           C  
ATOM   1831  CE1 PHE B 244     119.851  73.958   5.854  1.00 83.07           C  
ATOM   1832  CE2 PHE B 244     122.057  73.393   6.678  1.00 83.07           C  
ATOM   1833  CZ  PHE B 244     120.865  73.016   6.044  1.00 83.07           C  
ATOM   1834  N   PRO B 245     123.328  78.750   8.742  1.00 83.07           N  
ATOM   1835  CA  PRO B 245     124.739  79.142   8.700  1.00 83.07           C  
ATOM   1836  C   PRO B 245     125.299  79.806   9.942  1.00 83.07           C  
ATOM   1837  O   PRO B 245     125.404  79.215  11.033  1.00 83.07           O  
ATOM   1838  CB  PRO B 245     124.780  80.122   7.512  1.00 83.07           C  
ATOM   1839  CG  PRO B 245     123.331  80.707   7.461  1.00 83.07           C  
ATOM   1840  CD  PRO B 245     122.438  79.854   8.318  1.00 83.07           C  
ATOM   1841  N   GLY B 246     125.657  81.062   9.707  1.00 83.07           N  
ATOM   1842  CA  GLY B 246     126.331  81.950  10.626  1.00 83.07           C  
ATOM   1843  C   GLY B 246     126.795  83.021   9.657  1.00 83.07           C  
ATOM   1844  O   GLY B 246     127.993  83.178   9.376  1.00 83.07           O  
ATOM   1845  N   GLN B 247     125.800  83.691   9.080  1.00 83.07           N  
ATOM   1846  CA  GLN B 247     125.984  84.807   8.160  1.00 83.07           C  
ATOM   1847  C   GLN B 247     125.088  85.885   8.809  1.00 83.07           C  
ATOM   1848  O   GLN B 247     125.589  86.883   9.372  1.00 83.07           O  
ATOM   1849  CB  GLN B 247     125.523  84.428   6.741  1.00 83.07           C  
ATOM   1850  CG  GLN B 247     123.977  84.156   6.653  1.00 83.07           C  
ATOM   1851  CD  GLN B 247     123.546  83.118   5.596  1.00 83.07           C  
ATOM   1852  NE2 GLN B 247     122.201  82.902   5.448  1.00 83.07           N  
ATOM   1853  OE1 GLN B 247     124.412  82.505   4.938  1.00 83.07           O  
ATOM   1854  N   LEU B 248     123.774  85.648   8.781  1.00 83.07           N  
ATOM   1855  CA  LEU B 248     122.841  86.544   9.408  1.00 83.07           C  
ATOM   1856  C   LEU B 248     122.724  86.022  10.827  1.00 83.07           C  
ATOM   1857  O   LEU B 248     123.538  86.367  11.695  1.00 83.07           O  
ATOM   1858  CB  LEU B 248     121.478  86.497   8.714  1.00 83.07           C  
ATOM   1859  CG  LEU B 248     121.421  86.136   7.243  1.00 83.07           C  
ATOM   1860  CD1 LEU B 248     120.032  85.677   6.823  1.00 83.07           C  
ATOM   1861  CD2 LEU B 248     121.872  87.377   6.489  1.00 83.07           C  
ATOM   1862  N   ASN B 249     121.726  85.146  10.997  1.00 83.07           N  
ATOM   1863  CA  ASN B 249     121.243  84.478  12.243  1.00 83.07           C  
ATOM   1864  C   ASN B 249     119.690  84.494  12.308  1.00 83.07           C  
ATOM   1865  O   ASN B 249     119.046  83.506  12.732  1.00 83.07           O  
ATOM   1866  CB  ASN B 249     121.962  84.886  13.585  1.00 83.07           C  
ATOM   1867  CG  ASN B 249     121.598  86.311  14.110  1.00 83.07           C  
ATOM   1868  ND2 ASN B 249     122.574  86.928  14.791  1.00 83.07           N  
ATOM   1869  OD1 ASN B 249     120.470  86.828  13.936  1.00 83.07           O  
ATOM   1870  N   ALA B 250     119.140  85.631  11.867  1.00 83.07           N  
ATOM   1871  CA  ALA B 250     117.708  85.862  11.710  1.00 83.07           C  
ATOM   1872  C   ALA B 250     116.795  85.755  12.956  1.00 83.07           C  
ATOM   1873  O   ALA B 250     116.252  84.688  13.302  1.00 83.07           O  
ATOM   1874  CB  ALA B 250     117.163  85.005  10.529  1.00 83.07           C  
ATOM   1875  N   ASP B 251     116.592  86.893  13.597  1.00 83.07           N  
ATOM   1876  CA  ASP B 251     115.732  86.925  14.743  1.00 83.07           C  
ATOM   1877  C   ASP B 251     114.286  86.731  14.372  1.00 83.07           C  
ATOM   1878  O   ASP B 251     113.454  86.740  15.266  1.00 83.07           O  
ATOM   1879  CB  ASP B 251     115.867  88.262  15.444  1.00 83.07           C  
ATOM   1880  CG  ASP B 251     116.496  88.146  16.846  1.00 83.07           C  
ATOM   1881  OD1 ASP B 251     117.298  87.200  17.119  1.00 83.07           O  
ATOM   1882  OD2 ASP B 251     116.257  88.985  17.757  1.00 83.07           O1-
ATOM   1883  N   LEU B 252     113.977  86.556  13.080  1.00 83.07           N  
ATOM   1884  CA  LEU B 252     112.584  86.417  12.590  1.00 83.07           C  
ATOM   1885  C   LEU B 252     111.785  87.667  12.961  1.00 83.07           C  
ATOM   1886  O   LEU B 252     110.731  87.949  12.396  1.00 83.07           O  
ATOM   1887  CB  LEU B 252     111.909  85.123  13.088  1.00 83.07           C  
ATOM   1888  CG  LEU B 252     110.431  84.766  12.885  1.00 83.07           C  
ATOM   1889  CD1 LEU B 252     110.085  84.173  11.518  1.00 83.07           C  
ATOM   1890  CD2 LEU B 252     110.084  83.783  13.946  1.00 83.07           C  
ATOM   1891  N   ARG B 253     112.327  88.399  13.925  1.00 83.07           N  
ATOM   1892  CA  ARG B 253     111.808  89.665  14.368  1.00 83.07           C  
ATOM   1893  C   ARG B 253     112.601  90.660  13.565  1.00 83.07           C  
ATOM   1894  O   ARG B 253     112.069  91.645  13.080  1.00 83.07           O  
ATOM   1895  CB  ARG B 253     112.091  89.875  15.847  1.00 83.07           C  
ATOM   1896  CG  ARG B 253     112.239  91.342  16.250  1.00 83.07           C  
ATOM   1897  CD  ARG B 253     110.988  91.964  16.895  1.00 83.07           C  
ATOM   1898  NE  ARG B 253     111.067  91.838  18.347  1.00 83.07           N  
ATOM   1899  CZ  ARG B 253     110.515  90.856  19.058  1.00 83.07           C  
ATOM   1900  NH1 ARG B 253     109.788  89.910  18.477  1.00 83.07           N1+
ATOM   1901  NH2 ARG B 253     110.682  90.826  20.366  1.00 83.07           N  
ATOM   1902  N   LYS B 254     113.892  90.408  13.420  1.00 83.07           N  
ATOM   1903  CA  LYS B 254     114.704  91.292  12.614  1.00 83.07           C  
ATOM   1904  C   LYS B 254     114.103  91.248  11.217  1.00 83.07           C  
ATOM   1905  O   LYS B 254     113.957  92.270  10.569  1.00 83.07           O  
ATOM   1906  CB  LYS B 254     116.155  90.831  12.591  1.00 83.07           C  
ATOM   1907  CG  LYS B 254     117.037  91.399  13.676  1.00 83.07           C  
ATOM   1908  CD  LYS B 254     118.259  90.513  13.855  1.00 83.07           C  
ATOM   1909  CE  LYS B 254     119.335  91.202  14.690  1.00 83.07           C  
ATOM   1910  NZ  LYS B 254     120.256  90.242  15.402  1.00 83.07           N1+
ATOM   1911  N   LEU B 255     113.721  90.055  10.774  1.00 83.07           N  
ATOM   1912  CA  LEU B 255     113.100  89.881   9.468  1.00 83.07           C  
ATOM   1913  C   LEU B 255     111.825  90.689   9.407  1.00 83.07           C  
ATOM   1914  O   LEU B 255     111.523  91.272   8.383  1.00 83.07           O  
ATOM   1915  CB  LEU B 255     112.782  88.406   9.187  1.00 83.07           C  
ATOM   1916  CG  LEU B 255     112.416  87.903   7.776  1.00 83.07           C  
ATOM   1917  CD1 LEU B 255     110.912  87.954   7.476  1.00 83.07           C  
ATOM   1918  CD2 LEU B 255     113.209  88.611   6.693  1.00 83.07           C  
ATOM   1919  N   ALA B 256     111.069  90.722  10.494  1.00 83.07           N  
ATOM   1920  CA  ALA B 256     109.847  91.487  10.483  1.00 83.07           C  
ATOM   1921  C   ALA B 256     110.172  92.969  10.457  1.00 83.07           C  
ATOM   1922  O   ALA B 256     109.902  93.627   9.476  1.00 83.07           O  
ATOM   1923  CB  ALA B 256     108.994  91.134  11.639  1.00 83.07           C  
ATOM   1924  N   VAL B 257     110.801  93.484  11.499  1.00 83.07           N  
ATOM   1925  CA  VAL B 257     111.133  94.904  11.566  1.00 83.07           C  
ATOM   1926  C   VAL B 257     111.723  95.493  10.278  1.00 83.07           C  
ATOM   1927  O   VAL B 257     111.616  96.684  10.031  1.00 83.07           O  
ATOM   1928  CB  VAL B 257     112.065  95.191  12.767  1.00 83.07           C  
ATOM   1929  CG1 VAL B 257     113.522  95.263  12.355  1.00 83.07           C  
ATOM   1930  CG2 VAL B 257     111.679  96.458  13.433  1.00 83.07           C  
ATOM   1931  N   ASN B 258     112.311  94.644   9.445  1.00 83.07           N  
ATOM   1932  CA  ASN B 258     112.974  95.090   8.227  1.00 83.07           C  
ATOM   1933  C   ASN B 258     112.232  94.897   6.911  1.00 83.07           C  
ATOM   1934  O   ASN B 258     112.577  95.485   5.904  1.00 83.07           O  
ATOM   1935  CB  ASN B 258     114.328  94.413   8.134  1.00 83.07           C  
ATOM   1936  CG  ASN B 258     115.453  95.351   8.433  1.00 83.07           C  
ATOM   1937  ND2 ASN B 258     115.505  96.440   7.689  1.00 83.07           N  
ATOM   1938  OD1 ASN B 258     116.274  95.111   9.326  1.00 83.07           O  
ATOM   1939  N   MET B 259     111.217  94.061   6.910  1.00 83.07           N  
ATOM   1940  CA  MET B 259     110.488  93.812   5.695  1.00 83.07           C  
ATOM   1941  C   MET B 259     109.173  94.538   5.670  1.00 83.07           C  
ATOM   1942  O   MET B 259     108.681  94.858   4.600  1.00 83.07           O  
ATOM   1943  CB  MET B 259     110.207  92.330   5.578  1.00 83.07           C  
ATOM   1944  CG  MET B 259     111.370  91.537   5.124  1.00 83.07           C  
ATOM   1945  SD  MET B 259     111.923  92.200   3.626  1.00 83.07           S  
ATOM   1946  CE  MET B 259     110.820  91.375   2.479  1.00 83.07           C  
ATOM   1947  N   VAL B 260     108.593  94.780   6.842  1.00 83.07           N  
ATOM   1948  CA  VAL B 260     107.285  95.417   6.928  1.00 83.07           C  
ATOM   1949  C   VAL B 260     107.327  96.847   7.411  1.00 83.07           C  
ATOM   1950  O   VAL B 260     107.339  97.106   8.603  1.00 83.07           O  
ATOM   1951  CB  VAL B 260     106.322  94.626   7.821  1.00 83.07           C  
ATOM   1952  CG1 VAL B 260     105.872  93.352   7.132  1.00 83.07           C  
ATOM   1953  CG2 VAL B 260     106.962  94.304   9.148  1.00 83.07           C  
ATOM   1954  N   PRO B 261     107.320  97.780   6.477  1.00 83.07           N  
ATOM   1955  CA  PRO B 261     107.385  99.195   6.815  1.00 83.07           C  
ATOM   1956  C   PRO B 261     106.101  99.661   7.460  1.00 83.07           C  
ATOM   1957  O   PRO B 261     106.134 100.514   8.337  1.00 83.07           O  
ATOM   1958  CB  PRO B 261     107.587  99.869   5.458  1.00 83.07           C  
ATOM   1959  CG  PRO B 261     107.012  98.944   4.506  1.00 83.07           C  
ATOM   1960  CD  PRO B 261     107.244  97.567   5.029  1.00 83.07           C  
ATOM   1961  N   PHE B 262     104.980  99.089   7.060  1.00 83.07           N  
ATOM   1962  CA  PHE B 262     103.729  99.538   7.628  1.00 83.07           C  
ATOM   1963  C   PHE B 262     102.920  98.504   8.399  1.00 83.07           C  
ATOM   1964  O   PHE B 262     102.704  97.363   7.938  1.00 83.07           O  
ATOM   1965  CB  PHE B 262     102.937 100.295   6.595  1.00 83.07           C  
ATOM   1966  CG  PHE B 262     103.610 101.535   6.168  1.00 83.07           C  
ATOM   1967  CD1 PHE B 262     104.333 101.566   5.002  1.00 83.07           C  
ATOM   1968  CD2 PHE B 262     103.558 102.664   6.955  1.00 83.07           C  
ATOM   1969  CE1 PHE B 262     104.973 102.711   4.607  1.00 83.07           C  
ATOM   1970  CE2 PHE B 262     104.194 103.817   6.564  1.00 83.07           C  
ATOM   1971  CZ  PHE B 262     104.904 103.839   5.385  1.00 83.07           C  
ATOM   1972  N   PRO B 263     102.431  98.951   9.559  1.00 83.07           N  
ATOM   1973  CA  PRO B 263     101.807  98.069  10.532  1.00 83.07           C  
ATOM   1974  C   PRO B 263     101.009  96.971   9.881  1.00 83.07           C  
ATOM   1975  O   PRO B 263     101.305  95.818  10.203  1.00 83.07           O  
ATOM   1976  CB  PRO B 263     100.905  99.018  11.353  1.00 83.07           C  
ATOM   1977  CG  PRO B 263     100.990 100.359  10.687  1.00 83.07           C  
ATOM   1978  CD  PRO B 263     102.327 100.356   9.995  1.00 83.07           C  
ATOM   1979  N   ARG B 264     100.111  97.308   8.950  1.00 83.07           N  
ATOM   1980  CA  ARG B 264      99.177  96.342   8.354  1.00 83.07           C  
ATOM   1981  C   ARG B 264      99.786  95.098   7.683  1.00 83.07           C  
ATOM   1982  O   ARG B 264      99.553  94.816   6.484  1.00 83.07           O  
ATOM   1983  CB  ARG B 264      98.117  97.057   7.528  1.00 83.07           C  
ATOM   1984  CG  ARG B 264      97.407  98.143   8.363  1.00 83.07           C  
ATOM   1985  CD  ARG B 264      96.015  97.758   8.888  1.00 83.07           C  
ATOM   1986  NE  ARG B 264      94.979  98.024   7.885  1.00 83.07           N  
ATOM   1987  CZ  ARG B 264      93.673  97.832   8.055  1.00 83.07           C  
ATOM   1988  NH1 ARG B 264      93.188  97.362   9.205  1.00 83.07           N1+
ATOM   1989  NH2 ARG B 264      92.844  98.105   7.056  1.00 83.07           N  
ATOM   1990  N   LEU B 265     100.532  94.385   8.564  1.00 83.07           N  
ATOM   1991  CA  LEU B 265     101.344  93.113   8.445  1.00 83.07           C  
ATOM   1992  C   LEU B 265     101.877  92.669   7.064  1.00 83.07           C  
ATOM   1993  O   LEU B 265     102.459  91.568   6.884  1.00 83.07           O  
ATOM   1994  CB  LEU B 265     100.681  91.937   9.203  1.00 83.07           C  
ATOM   1995  CG  LEU B 265      99.854  90.931   8.405  1.00 83.07           C  
ATOM   1996  CD1 LEU B 265     100.709  89.857   7.723  1.00 83.07           C  
ATOM   1997  CD2 LEU B 265      98.868  90.320   9.327  1.00 83.07           C  
ATOM   1998  N   HIS B 266     101.676  93.563   6.116  1.00 83.07           N  
ATOM   1999  CA  HIS B 266     102.038  93.353   4.756  1.00 83.07           C  
ATOM   2000  C   HIS B 266     102.430  91.904   4.380  1.00 83.07           C  
ATOM   2001  O   HIS B 266     103.146  91.157   5.079  1.00 83.07           O  
ATOM   2002  CB  HIS B 266     102.785  94.583   4.272  1.00 83.07           C  
ATOM   2003  CG  HIS B 266     101.953  95.811   4.500  1.00 83.07           C  
ATOM   2004  CD2 HIS B 266     101.536  96.393   5.651  1.00 83.07           C  
ATOM   2005  ND1 HIS B 266     101.285  96.469   3.485  1.00 83.07           N  
ATOM   2006  CE1 HIS B 266     100.554  97.448   3.993  1.00 83.07           C  
ATOM   2007  NE2 HIS B 266     100.681  97.417   5.308  1.00 83.07           N  
ATOM   2008  N   PHE B 267     101.770  91.491   3.316  1.00 83.07           N  
ATOM   2009  CA  PHE B 267     101.838  90.141   2.833  1.00 83.07           C  
ATOM   2010  C   PHE B 267     102.866  90.050   1.727  1.00 83.07           C  
ATOM   2011  O   PHE B 267     102.928  90.871   0.787  1.00 83.07           O  
ATOM   2012  CB  PHE B 267     100.437  89.690   2.426  1.00 83.07           C  
ATOM   2013  CG  PHE B 267      99.402  89.959   3.484  1.00 83.07           C  
ATOM   2014  CD1 PHE B 267      99.040  91.267   3.815  1.00 83.07           C  
ATOM   2015  CD2 PHE B 267      98.817  88.915   4.176  1.00 83.07           C  
ATOM   2016  CE1 PHE B 267      98.110  91.519   4.796  1.00 83.07           C  
ATOM   2017  CE2 PHE B 267      97.871  89.158   5.162  1.00 83.07           C  
ATOM   2018  CZ  PHE B 267      97.515  90.460   5.467  1.00 83.07           C  
ATOM   2019  N   PHE B 268     103.699  89.039   1.900  1.00 83.07           N  
ATOM   2020  CA  PHE B 268     104.802  88.777   1.027  1.00 83.07           C  
ATOM   2021  C   PHE B 268     104.431  87.861  -0.126  1.00 83.07           C  
ATOM   2022  O   PHE B 268     103.690  86.881   0.071  1.00 83.07           O  
ATOM   2023  CB  PHE B 268     105.870  88.089   1.864  1.00 83.07           C  
ATOM   2024  CG  PHE B 268     106.333  88.890   3.031  1.00 83.07           C  
ATOM   2025  CD1 PHE B 268     107.068  88.284   4.038  1.00 83.07           C  
ATOM   2026  CD2 PHE B 268     106.071  90.249   3.116  1.00 83.07           C  
ATOM   2027  CE1 PHE B 268     107.528  89.016   5.132  1.00 83.07           C  
ATOM   2028  CE2 PHE B 268     106.515  90.989   4.187  1.00 83.07           C  
ATOM   2029  CZ  PHE B 268     107.245  90.375   5.206  1.00 83.07           C  
ATOM   2030  N   MET B 269     104.896  88.188  -1.334  1.00 83.07           N  
ATOM   2031  CA  MET B 269     104.780  87.207  -2.401  1.00 83.07           C  
ATOM   2032  C   MET B 269     106.170  86.584  -2.601  1.00 83.07           C  
ATOM   2033  O   MET B 269     107.158  87.308  -2.768  1.00 83.07           O  
ATOM   2034  CB  MET B 269     104.155  87.725  -3.678  1.00 83.07           C  
ATOM   2035  CG  MET B 269     104.389  89.145  -3.985  1.00 83.07           C  
ATOM   2036  SD  MET B 269     103.965  89.279  -5.739  1.00 83.07           S  
ATOM   2037  CE  MET B 269     105.561  89.834  -6.415  1.00 83.07           C  
ATOM   2038  N   PRO B 270     106.229  85.250  -2.483  1.00 83.07           N  
ATOM   2039  CA  PRO B 270     107.463  84.472  -2.607  1.00 83.07           C  
ATOM   2040  C   PRO B 270     107.708  83.991  -4.021  1.00 83.07           C  
ATOM   2041  O   PRO B 270     106.757  83.903  -4.789  1.00 83.07           O  
ATOM   2042  CB  PRO B 270     107.184  83.251  -1.737  1.00 83.07           C  
ATOM   2043  CG  PRO B 270     105.738  83.325  -1.367  1.00 83.07           C  
ATOM   2044  CD  PRO B 270     105.088  84.370  -2.189  1.00 83.07           C  
ATOM   2045  N   GLY B 271     108.958  83.683  -4.351  1.00 83.07           N  
ATOM   2046  CA  GLY B 271     109.318  83.212  -5.677  1.00 83.07           C  
ATOM   2047  C   GLY B 271     110.524  82.302  -5.627  1.00 83.07           C  
ATOM   2048  O   GLY B 271     111.453  82.542  -4.856  1.00 83.07           O  
ATOM   2049  N   PHE B 272     110.530  81.269  -6.459  1.00 83.07           N  
ATOM   2050  CA  PHE B 272     111.621  80.307  -6.439  1.00 83.07           C  
ATOM   2051  C   PHE B 272     112.446  80.334  -7.718  1.00 83.07           C  
ATOM   2052  O   PHE B 272     111.977  80.836  -8.735  1.00 83.07           O  
ATOM   2053  CB  PHE B 272     111.040  78.927  -6.214  1.00 83.07           C  
ATOM   2054  CG  PHE B 272     111.991  77.967  -5.583  1.00 83.07           C  
ATOM   2055  CD1 PHE B 272     112.275  78.030  -4.221  1.00 83.07           C  
ATOM   2056  CD2 PHE B 272     112.596  76.973  -6.349  1.00 83.07           C  
ATOM   2057  CE1 PHE B 272     113.167  77.111  -3.630  1.00 83.07           C  
ATOM   2058  CE2 PHE B 272     113.485  76.051  -5.770  1.00 83.07           C  
ATOM   2059  CZ  PHE B 272     113.773  76.121  -4.408  1.00 83.07           C  
ATOM   2060  N   ALA B 273     113.664  79.788  -7.667  1.00 83.07           N  
ATOM   2061  CA  ALA B 273     114.574  79.790  -8.822  1.00 83.07           C  
ATOM   2062  C   ALA B 273     114.321  78.682  -9.862  1.00 83.07           C  
ATOM   2063  O   ALA B 273     113.504  78.890 -10.767  1.00 83.07           O  
ATOM   2064  CB  ALA B 273     116.031  79.822  -8.379  1.00 83.07           C  
ATOM   2065  N   PRO B 274     115.010  77.533  -9.777  1.00 83.07           N  
ATOM   2066  CA  PRO B 274     114.771  76.433 -10.731  1.00 83.07           C  
ATOM   2067  C   PRO B 274     113.576  75.587 -10.239  1.00 83.07           C  
ATOM   2068  O   PRO B 274     113.333  75.592  -9.018  1.00 83.07           O  
ATOM   2069  CB  PRO B 274     116.073  75.635 -10.666  1.00 83.07           C  
ATOM   2070  CG  PRO B 274     116.952  76.373  -9.670  1.00 83.07           C  
ATOM   2071  CD  PRO B 274     116.047  77.170  -8.793  1.00 83.07           C  
ATOM   2072  N   LEU B 275     112.832  74.886 -11.105  1.00 83.07           N  
ATOM   2073  CA  LEU B 275     111.651  74.170 -10.577  1.00 83.07           C  
ATOM   2074  C   LEU B 275     111.137  72.930 -11.323  1.00 83.07           C  
ATOM   2075  O   LEU B 275     111.563  72.664 -12.463  1.00 83.07           O  
ATOM   2076  CB  LEU B 275     110.497  75.170 -10.380  1.00 83.07           C  
ATOM   2077  CG  LEU B 275     110.610  76.504 -11.130  1.00 83.07           C  
ATOM   2078  CD1 LEU B 275     110.623  76.347 -12.695  1.00 83.07           C  
ATOM   2079  CD2 LEU B 275     109.523  77.455 -10.606  1.00 83.07           C  
ATOM   2080  N   THR B 276     110.229  72.201 -10.625  1.00 83.07           N  
ATOM   2081  CA  THR B 276     109.467  70.978 -11.066  1.00 83.07           C  
ATOM   2082  C   THR B 276     109.900  69.616 -10.434  1.00 83.07           C  
ATOM   2083  O   THR B 276     111.075  69.451 -10.087  1.00 83.07           O  
ATOM   2084  CB  THR B 276     109.262  70.896 -12.666  1.00 83.07           C  
ATOM   2085  CG2 THR B 276     109.770  69.551 -13.315  1.00 83.07           C  
ATOM   2086  OG1 THR B 276     107.858  70.958 -12.995  1.00 83.07           O  
ATOM   2087  N   SER B 277     108.943  68.677 -10.276  1.00 83.07           N  
ATOM   2088  CA  SER B 277     109.184  67.301  -9.758  1.00 83.07           C  
ATOM   2089  C   SER B 277     108.817  66.204 -10.776  1.00 83.07           C  
ATOM   2090  O   SER B 277     109.589  65.894 -11.689  1.00 83.07           O  
ATOM   2091  CB  SER B 277     108.463  67.045  -8.412  1.00 83.07           C  
ATOM   2092  OG  SER B 277     107.110  66.624  -8.559  1.00 83.07           O  
TER    2093      SER B 277 
ATOM   2094  N   LEU B 286     121.698  76.902 -15.036  1.00 83.07           N  
ATOM   2095  CA  LEU B 286     121.330  77.801 -13.947  1.00 83.07           C  
ATOM   2096  C   LEU B 286     122.536  78.678 -13.646  1.00 83.07           C  
ATOM   2097  O   LEU B 286     123.178  78.538 -12.608  1.00 83.07           O  
ATOM   2098  CB  LEU B 286     120.894  76.993 -12.718  1.00 83.07           C  
ATOM   2099  CG  LEU B 286     120.166  75.663 -12.975  1.00 83.07           C  
ATOM   2100  CD1 LEU B 286     120.313  74.703 -11.797  1.00 83.07           C  
ATOM   2101  CD2 LEU B 286     118.698  75.888 -13.306  1.00 83.07           C  
ATOM   2102  N   THR B 287     122.807  79.602 -14.564  1.00 83.07           N  
ATOM   2103  CA  THR B 287     124.011  80.437 -14.535  1.00 83.07           C  
ATOM   2104  C   THR B 287     124.213  81.504 -13.430  1.00 83.07           C  
ATOM   2105  O   THR B 287     125.356  81.822 -13.102  1.00 83.07           O  
ATOM   2106  CB  THR B 287     124.279  80.999 -15.971  1.00 83.07           C  
ATOM   2107  CG2 THR B 287     124.148  82.506 -16.041  1.00 83.07           C  
ATOM   2108  OG1 THR B 287     125.646  80.772 -16.337  1.00 83.07           O  
ATOM   2109  N   VAL B 288     123.128  82.021 -12.857  1.00 83.07           N  
ATOM   2110  CA  VAL B 288     123.125  83.082 -11.817  1.00 83.07           C  
ATOM   2111  C   VAL B 288     122.453  84.306 -12.422  1.00 83.07           C  
ATOM   2112  O   VAL B 288     121.379  84.690 -11.952  1.00 83.07           O  
ATOM   2113  CB  VAL B 288     124.499  83.392 -11.095  1.00 83.07           C  
ATOM   2114  CG1 VAL B 288     124.493  84.766 -10.416  1.00 83.07           C  
ATOM   2115  CG2 VAL B 288     124.800  82.339 -10.049  1.00 83.07           C  
ATOM   2116  N   PRO B 289     123.064  84.955 -13.417  1.00 83.07           N  
ATOM   2117  CA  PRO B 289     122.336  85.994 -14.136  1.00 83.07           C  
ATOM   2118  C   PRO B 289     121.049  85.320 -14.585  1.00 83.07           C  
ATOM   2119  O   PRO B 289     119.993  85.941 -14.511  1.00 83.07           O  
ATOM   2120  CB  PRO B 289     123.228  86.284 -15.342  1.00 83.07           C  
ATOM   2121  CG  PRO B 289     124.589  85.996 -14.867  1.00 83.07           C  
ATOM   2122  CD  PRO B 289     124.453  84.851 -13.892  1.00 83.07           C  
ATOM   2123  N   GLU B 290     121.146  84.045 -14.981  1.00 83.07           N  
ATOM   2124  CA  GLU B 290     119.999  83.242 -15.430  1.00 83.07           C  
ATOM   2125  C   GLU B 290     119.024  82.970 -14.286  1.00 83.07           C  
ATOM   2126  O   GLU B 290     117.802  82.903 -14.486  1.00 83.07           O  
ATOM   2127  CB  GLU B 290     120.477  81.925 -16.073  1.00 83.07           C  
ATOM   2128  CG  GLU B 290     121.242  82.132 -17.383  1.00 83.07           C  
ATOM   2129  CD  GLU B 290     121.089  81.006 -18.405  1.00 83.07           C  
ATOM   2130  OE1 GLU B 290     120.252  80.097 -18.191  1.00 83.07           O  
ATOM   2131  OE2 GLU B 290     121.809  81.036 -19.440  1.00 83.07           O1-
ATOM   2132  N   LEU B 291     119.586  82.842 -13.089  1.00 83.07           N  
ATOM   2133  CA  LEU B 291     118.822  82.592 -11.879  1.00 83.07           C  
ATOM   2134  C   LEU B 291     118.065  83.840 -11.400  1.00 83.07           C  
ATOM   2135  O   LEU B 291     116.900  83.742 -11.028  1.00 83.07           O  
ATOM   2136  CB  LEU B 291     119.756  82.034 -10.802  1.00 83.07           C  
ATOM   2137  CG  LEU B 291     119.217  81.659  -9.428  1.00 83.07           C  
ATOM   2138  CD1 LEU B 291     120.091  80.581  -8.797  1.00 83.07           C  
ATOM   2139  CD2 LEU B 291     119.189  82.908  -8.569  1.00 83.07           C  
ATOM   2140  N   THR B 292     118.725  84.998 -11.403  1.00 83.07           N  
ATOM   2141  CA  THR B 292     118.079  86.240 -10.997  1.00 83.07           C  
ATOM   2142  C   THR B 292     116.953  86.584 -11.962  1.00 83.07           C  
ATOM   2143  O   THR B 292     115.818  86.774 -11.537  1.00 83.07           O  
ATOM   2144  CB  THR B 292     119.079  87.392 -10.916  1.00 83.07           C  
ATOM   2145  CG2 THR B 292     119.523  87.598  -9.516  1.00 83.07           C  
ATOM   2146  OG1 THR B 292     120.294  86.994 -11.531  1.00 83.07           O  
ATOM   2147  N   GLN B 293     117.259  86.622 -13.260  1.00 83.07           N  
ATOM   2148  CA  GLN B 293     116.276  86.954 -14.307  1.00 83.07           C  
ATOM   2149  C   GLN B 293     114.988  86.194 -14.137  1.00 83.07           C  
ATOM   2150  O   GLN B 293     113.922  86.690 -14.501  1.00 83.07           O  
ATOM   2151  CB  GLN B 293     116.819  86.652 -15.702  1.00 83.07           C  
ATOM   2152  CG  GLN B 293     118.168  87.282 -15.981  1.00 83.07           C  
ATOM   2153  CD  GLN B 293     118.210  88.071 -17.268  1.00 83.07           C  
ATOM   2154  NE2 GLN B 293     119.158  87.737 -18.146  1.00 83.07           N  
ATOM   2155  OE1 GLN B 293     117.407  88.982 -17.465  1.00 83.07           O  
ATOM   2156  N   GLN B 294     115.113  84.990 -13.579  1.00 83.07           N  
ATOM   2157  CA  GLN B 294     113.988  84.088 -13.338  1.00 83.07           C  
ATOM   2158  C   GLN B 294     113.264  84.358 -12.015  1.00 83.07           C  
ATOM   2159  O   GLN B 294     112.036  84.410 -11.973  1.00 83.07           O  
ATOM   2160  CB  GLN B 294     114.456  82.619 -13.418  1.00 83.07           C  
ATOM   2161  CG  GLN B 294     113.395  81.561 -13.008  1.00 83.07           C  
ATOM   2162  CD  GLN B 294     113.305  80.350 -13.957  1.00 83.07           C  
ATOM   2163  NE2 GLN B 294     113.883  80.479 -15.153  1.00 83.07           N  
ATOM   2164  OE1 GLN B 294     112.711  79.317 -13.605  1.00 83.07           O  
ATOM   2165  N   MET B 295     114.030  84.536 -10.947  1.00 83.07           N  
ATOM   2166  CA  MET B 295     113.486  84.756  -9.603  1.00 83.07           C  
ATOM   2167  C   MET B 295     112.761  86.096  -9.435  1.00 83.07           C  
ATOM   2168  O   MET B 295     112.078  86.323  -8.423  1.00 83.07           O  
ATOM   2169  CB  MET B 295     114.630  84.629  -8.601  1.00 83.07           C  
ATOM   2170  CG  MET B 295     114.313  84.943  -7.163  1.00 83.07           C  
ATOM   2171  SD  MET B 295     115.476  86.176  -6.474  1.00 83.07           S  
ATOM   2172  CE  MET B 295     117.104  85.664  -7.118  1.00 83.07           C  
ATOM   2173  N   PHE B 296     112.915  86.967 -10.434  1.00 83.07           N  
ATOM   2174  CA  PHE B 296     112.307  88.294 -10.435  1.00 83.07           C  
ATOM   2175  C   PHE B 296     111.251  88.398 -11.519  1.00 83.07           C  
ATOM   2176  O   PHE B 296     110.830  89.494 -11.881  1.00 83.07           O  
ATOM   2177  CB  PHE B 296     113.380  89.368 -10.650  1.00 83.07           C  
ATOM   2178  CG  PHE B 296     113.945  89.941  -9.369  1.00 83.07           C  
ATOM   2179  CD1 PHE B 296     115.287  89.777  -9.054  1.00 83.07           C  
ATOM   2180  CD2 PHE B 296     113.136  90.648  -8.483  1.00 83.07           C  
ATOM   2181  CE1 PHE B 296     115.813  90.299  -7.884  1.00 83.07           C  
ATOM   2182  CE2 PHE B 296     113.661  91.173  -7.309  1.00 83.07           C  
ATOM   2183  CZ  PHE B 296     115.004  90.997  -7.013  1.00 83.07           C  
ATOM   2184  N   ASP B 297     110.830  87.247 -12.030  1.00 83.07           N  
ATOM   2185  CA  ASP B 297     109.825  87.180 -13.083  1.00 83.07           C  
ATOM   2186  C   ASP B 297     108.454  86.810 -12.530  1.00 83.07           C  
ATOM   2187  O   ASP B 297     108.340  85.923 -11.682  1.00 83.07           O  
ATOM   2188  CB  ASP B 297     110.249  86.165 -14.148  1.00 83.07           C  
ATOM   2189  CG  ASP B 297     109.457  86.299 -15.436  1.00 83.07           C  
ATOM   2190  OD1 ASP B 297     108.717  87.295 -15.585  1.00 83.07           O  
ATOM   2191  OD2 ASP B 297     109.508  85.460 -16.363  1.00 83.07           O1-
ATOM   2192  N   ALA B 298     107.421  87.499 -13.017  1.00 83.07           N  
ATOM   2193  CA  ALA B 298     106.028  87.246 -12.626  1.00 83.07           C  
ATOM   2194  C   ALA B 298     105.699  85.762 -12.789  1.00 83.07           C  
ATOM   2195  O   ALA B 298     105.181  85.107 -11.869  1.00 83.07           O  
ATOM   2196  CB  ALA B 298     105.089  88.089 -13.483  1.00 83.07           C  
ATOM   2197  N   LYS B 299     106.024  85.263 -13.982  1.00 83.07           N  
ATOM   2198  CA  LYS B 299     105.896  83.869 -14.399  1.00 83.07           C  
ATOM   2199  C   LYS B 299     106.502  82.897 -13.371  1.00 83.07           C  
ATOM   2200  O   LYS B 299     106.392  81.680 -13.525  1.00 83.07           O  
ATOM   2201  CB  LYS B 299     106.634  83.724 -15.738  1.00 83.07           C  
ATOM   2202  CG  LYS B 299     106.115  82.687 -16.706  1.00 83.07           C  
ATOM   2203  CD  LYS B 299     107.177  82.426 -17.773  1.00 83.07           C  
ATOM   2204  CE  LYS B 299     106.819  83.065 -19.104  1.00 83.07           C  
ATOM   2205  NZ  LYS B 299     107.289  82.250 -20.262  1.00 83.07           N1+
ATOM   2206  N   ASN B 300     107.119  83.449 -12.323  1.00 83.07           N  
ATOM   2207  CA  ASN B 300     107.791  82.672 -11.280  1.00 83.07           C  
ATOM   2208  C   ASN B 300     107.479  83.058  -9.823  1.00 83.07           C  
ATOM   2209  O   ASN B 300     108.207  82.653  -8.899  1.00 83.07           O  
ATOM   2210  CB  ASN B 300     109.302  82.732 -11.503  1.00 83.07           C  
ATOM   2211  CG  ASN B 300     109.935  81.368 -11.526  1.00 83.07           C  
ATOM   2212  ND2 ASN B 300     110.398  80.955 -12.700  1.00 83.07           N  
ATOM   2213  OD1 ASN B 300     110.001  80.681 -10.501  1.00 83.07           O  
ATOM   2214  N   MET B 301     106.412  83.841  -9.628  1.00 83.07           N  
ATOM   2215  CA  MET B 301     105.980  84.265  -8.288  1.00 83.07           C  
ATOM   2216  C   MET B 301     105.047  83.215  -7.753  1.00 83.07           C  
ATOM   2217  O   MET B 301     104.421  82.493  -8.521  1.00 83.07           O  
ATOM   2218  CB  MET B 301     105.268  85.628  -8.299  1.00 83.07           C  
ATOM   2219  CG  MET B 301     106.156  86.832  -8.668  1.00 83.07           C  
ATOM   2220  SD  MET B 301     107.546  87.151  -7.548  1.00 83.07           S  
ATOM   2221  CE  MET B 301     108.947  87.272  -8.702  1.00 83.07           C  
ATOM   2222  N   MET B 302     104.949  83.143  -6.436  1.00 83.07           N  
ATOM   2223  CA  MET B 302     104.102  82.146  -5.803  1.00 83.07           C  
ATOM   2224  C   MET B 302     102.675  82.663  -5.584  1.00 83.07           C  
ATOM   2225  O   MET B 302     101.797  81.922  -5.131  1.00 83.07           O  
ATOM   2226  CB  MET B 302     104.743  81.639  -4.497  1.00 83.07           C  
ATOM   2227  CG  MET B 302     105.049  80.116  -4.434  1.00 83.07           C  
ATOM   2228  SD  MET B 302     105.675  79.314  -5.964  1.00 83.07           S  
ATOM   2229  CE  MET B 302     107.395  80.099  -6.091  1.00 83.07           C  
ATOM   2230  N   ALA B 303     102.441  83.933  -5.901  1.00 83.07           N  
ATOM   2231  CA  ALA B 303     101.096  84.503  -5.788  1.00 83.07           C  
ATOM   2232  C   ALA B 303     100.667  85.039  -7.134  1.00 83.07           C  
ATOM   2233  O   ALA B 303     101.495  85.581  -7.895  1.00 83.07           O  
ATOM   2234  CB  ALA B 303     101.046  85.600  -4.737  1.00 83.07           C  
ATOM   2235  N   ALA B 304      99.384  84.877  -7.448  1.00 83.07           N  
ATOM   2236  CA  ALA B 304      98.880  85.390  -8.727  1.00 83.07           C  
ATOM   2237  C   ALA B 304      98.908  86.912  -8.688  1.00 83.07           C  
ATOM   2238  O   ALA B 304      97.977  87.568  -8.176  1.00 83.07           O  
ATOM   2239  CB  ALA B 304      97.470  84.871  -9.060  1.00 83.07           C  
ATOM   2240  N   CYS B 305     100.018  87.448  -9.193  1.00 83.07           N  
ATOM   2241  CA  CYS B 305     100.262  88.873  -9.240  1.00 83.07           C  
ATOM   2242  C   CYS B 305     101.183  89.071 -10.405  1.00 83.07           C  
ATOM   2243  O   CYS B 305     101.336  88.179 -11.244  1.00 83.07           O  
ATOM   2244  CB  CYS B 305     100.949  89.340  -7.961  1.00 83.07           C  
ATOM   2245  SG  CYS B 305      99.890  89.212  -6.511  1.00 83.07           S  
ATOM   2246  N   ASP B 306     101.786  90.250 -10.447  1.00 83.07           N  
ATOM   2247  CA  ASP B 306     102.718  90.625 -11.482  1.00 83.07           C  
ATOM   2248  C   ASP B 306     103.328  91.937 -11.063  1.00 83.07           C  
ATOM   2249  O   ASP B 306     102.784  93.009 -11.353  1.00 83.07           O  
ATOM   2250  CB  ASP B 306     102.034  90.777 -12.835  1.00 83.07           C  
ATOM   2251  CG  ASP B 306     103.012  91.133 -13.929  1.00 83.07           C  
ATOM   2252  OD1 ASP B 306     104.221  91.323 -13.643  1.00 83.07           O  
ATOM   2253  OD2 ASP B 306     102.669  91.253 -15.120  1.00 83.07           O1-
ATOM   2254  N   PRO B 307     104.455  91.849 -10.365  1.00 83.07           N  
ATOM   2255  CA  PRO B 307     105.163  93.052  -9.938  1.00 83.07           C  
ATOM   2256  C   PRO B 307     105.551  93.763 -11.228  1.00 83.07           C  
ATOM   2257  O   PRO B 307     106.473  93.359 -11.931  1.00 83.07           O  
ATOM   2258  CB  PRO B 307     106.389  92.506  -9.189  1.00 83.07           C  
ATOM   2259  CG  PRO B 307     106.552  91.092  -9.675  1.00 83.07           C  
ATOM   2260  CD  PRO B 307     105.156  90.613  -9.966  1.00 83.07           C  
ATOM   2261  N   ARG B 308     104.779  94.780 -11.563  1.00 83.07           N  
ATOM   2262  CA  ARG B 308     104.963  95.587 -12.756  1.00 83.07           C  
ATOM   2263  C   ARG B 308     103.832  96.536 -12.476  1.00 83.07           C  
ATOM   2264  O   ARG B 308     104.002  97.768 -12.462  1.00 83.07           O  
ATOM   2265  CB  ARG B 308     104.669  94.783 -14.036  1.00 83.07           C  
ATOM   2266  CG  ARG B 308     105.860  94.425 -14.923  1.00 83.07           C  
ATOM   2267  CD  ARG B 308     107.146  94.145 -14.155  1.00 83.07           C  
ATOM   2268  NE  ARG B 308     108.393  94.223 -14.926  1.00 83.07           N  
ATOM   2269  CZ  ARG B 308     108.681  95.134 -15.880  1.00 83.07           C  
ATOM   2270  NH1 ARG B 308     107.799  96.071 -16.220  1.00 83.07           N1+
ATOM   2271  NH2 ARG B 308     109.861  95.106 -16.516  1.00 83.07           N  
ATOM   2272  N   HIS B 309     102.678  95.922 -12.199  1.00 83.07           N  
ATOM   2273  CA  HIS B 309     101.462  96.609 -11.843  1.00 83.07           C  
ATOM   2274  C   HIS B 309     101.647  96.942 -10.381  1.00 83.07           C  
ATOM   2275  O   HIS B 309     100.764  96.712  -9.573  1.00 83.07           O  
ATOM   2276  CB  HIS B 309     100.271  95.668 -12.052  1.00 83.07           C  
ATOM   2277  CG  HIS B 309     100.167  95.151 -13.449  1.00 83.07           C  
ATOM   2278  CD2 HIS B 309     100.845  94.168 -14.086  1.00 83.07           C  
ATOM   2279  ND1 HIS B 309      99.315  95.698 -14.387  1.00 83.07           N  
ATOM   2280  CE1 HIS B 309      99.463  95.067 -15.540  1.00 83.07           C  
ATOM   2281  NE2 HIS B 309     100.391  94.138 -15.386  1.00 83.07           N  
ATOM   2282  N   GLY B 310     102.817  97.456 -10.028  1.00 83.07           N  
ATOM   2283  CA  GLY B 310     103.082  97.781  -8.648  1.00 83.07           C  
ATOM   2284  C   GLY B 310     104.534  97.702  -8.271  1.00 83.07           C  
ATOM   2285  O   GLY B 310     105.272  96.837  -8.736  1.00 83.07           O  
ATOM   2286  N   ARG B 311     104.907  98.617  -7.386  1.00 83.07           N  
ATOM   2287  CA  ARG B 311     106.260  98.775  -6.904  1.00 83.07           C  
ATOM   2288  C   ARG B 311     106.525  97.815  -5.758  1.00 83.07           C  
ATOM   2289  O   ARG B 311     105.588  97.240  -5.213  1.00 83.07           O  
ATOM   2290  CB  ARG B 311     106.460 100.233  -6.474  1.00 83.07           C  
ATOM   2291  CG  ARG B 311     106.378 101.245  -7.658  1.00 83.07           C  
ATOM   2292  CD  ARG B 311     105.506 102.526  -7.440  1.00 83.07           C  
ATOM   2293  NE  ARG B 311     106.241 103.614  -6.781  1.00 83.07           N  
ATOM   2294  CZ  ARG B 311     107.241 104.308  -7.331  1.00 83.07           C  
ATOM   2295  NH1 ARG B 311     107.630 104.058  -8.570  1.00 83.07           N1+
ATOM   2296  NH2 ARG B 311     107.854 105.259  -6.638  1.00 83.07           N  
ATOM   2297  N   TYR B 312     107.801  97.609  -5.428  1.00 83.07           N  
ATOM   2298  CA  TYR B 312     108.192  96.756  -4.311  1.00 83.07           C  
ATOM   2299  C   TYR B 312     108.477  97.666  -3.138  1.00 83.07           C  
ATOM   2300  O   TYR B 312     109.147  98.681  -3.290  1.00 83.07           O  
ATOM   2301  CB  TYR B 312     109.478  96.028  -4.621  1.00 83.07           C  
ATOM   2302  CG  TYR B 312     109.392  94.888  -5.592  1.00 83.07           C  
ATOM   2303  CD1 TYR B 312     109.991  94.983  -6.842  1.00 83.07           C  
ATOM   2304  CD2 TYR B 312     108.776  93.689  -5.243  1.00 83.07           C  
ATOM   2305  CE1 TYR B 312     109.949  93.925  -7.738  1.00 83.07           C  
ATOM   2306  CE2 TYR B 312     108.724  92.614  -6.135  1.00 83.07           C  
ATOM   2307  CZ  TYR B 312     109.315  92.742  -7.384  1.00 83.07           C  
ATOM   2308  OH  TYR B 312     109.280  91.698  -8.287  1.00 83.07           O  
ATOM   2309  N   LEU B 313     107.972  97.313  -1.970  1.00 83.07           N  
ATOM   2310  CA  LEU B 313     108.220  98.108  -0.786  1.00 83.07           C  
ATOM   2311  C   LEU B 313     109.612  97.752  -0.300  1.00 83.07           C  
ATOM   2312  O   LEU B 313     110.450  98.628  -0.108  1.00 83.07           O  
ATOM   2313  CB  LEU B 313     107.183  97.802   0.281  1.00 83.07           C  
ATOM   2314  CG  LEU B 313     106.277  98.928   0.755  1.00 83.07           C  
ATOM   2315  CD1 LEU B 313     106.281 100.081  -0.213  1.00 83.07           C  
ATOM   2316  CD2 LEU B 313     104.877  98.384   0.954  1.00 83.07           C  
ATOM   2317  N   THR B 314     109.841  96.458  -0.093  1.00 83.07           N  
ATOM   2318  CA  THR B 314     111.137  95.924   0.302  1.00 83.07           C  
ATOM   2319  C   THR B 314     111.210  94.517  -0.227  1.00 83.07           C  
ATOM   2320  O   THR B 314     110.210  93.810  -0.274  1.00 83.07           O  
ATOM   2321  CB  THR B 314     111.328  95.877   1.825  1.00 83.07           C  
ATOM   2322  CG2 THR B 314     111.151  97.242   2.470  1.00 83.07           C  
ATOM   2323  OG1 THR B 314     110.293  95.082   2.411  1.00 83.07           O  
ATOM   2324  N   VAL B 315     112.406  94.107  -0.605  1.00 83.07           N  
ATOM   2325  CA  VAL B 315     112.626  92.782  -1.139  1.00 83.07           C  
ATOM   2326  C   VAL B 315     113.776  92.121  -0.418  1.00 83.07           C  
ATOM   2327  O   VAL B 315     114.706  92.776   0.017  1.00 83.07           O  
ATOM   2328  CB  VAL B 315     112.891  92.844  -2.634  1.00 83.07           C  
ATOM   2329  CG1 VAL B 315     113.799  91.722  -3.085  1.00 83.07           C  
ATOM   2330  CG2 VAL B 315     111.592  92.768  -3.355  1.00 83.07           C  
ATOM   2331  N   ALA B 316     113.699  90.808  -0.307  1.00 83.07           N  
ATOM   2332  CA  ALA B 316     114.699  90.040   0.383  1.00 83.07           C  
ATOM   2333  C   ALA B 316     114.924  88.763  -0.382  1.00 83.07           C  
ATOM   2334  O   ALA B 316     113.993  88.000  -0.597  1.00 83.07           O  
ATOM   2335  CB  ALA B 316     114.202  89.740   1.731  1.00 83.07           C  
ATOM   2336  N   ALA B 317     116.157  88.525  -0.798  1.00 83.07           N  
ATOM   2337  CA  ALA B 317     116.449  87.341  -1.576  1.00 83.07           C  
ATOM   2338  C   ALA B 317     117.504  86.517  -0.907  1.00 83.07           C  
ATOM   2339  O   ALA B 317     118.434  87.049  -0.326  1.00 83.07           O  
ATOM   2340  CB  ALA B 317     116.896  87.726  -2.949  1.00 83.07           C  
ATOM   2341  N   VAL B 318     117.361  85.203  -1.008  1.00 83.07           N  
ATOM   2342  CA  VAL B 318     118.319  84.270  -0.411  1.00 83.07           C  
ATOM   2343  C   VAL B 318     118.776  83.161  -1.395  1.00 83.07           C  
ATOM   2344  O   VAL B 318     117.992  82.276  -1.766  1.00 83.07           O  
ATOM   2345  CB  VAL B 318     117.803  83.721   0.969  1.00 83.07           C  
ATOM   2346  CG1 VAL B 318     116.294  83.839   1.086  1.00 83.07           C  
ATOM   2347  CG2 VAL B 318     118.254  82.294   1.226  1.00 83.07           C  
ATOM   2348  N   PHE B 319     120.046  83.230  -1.810  1.00 83.07           N  
ATOM   2349  CA  PHE B 319     120.630  82.281  -2.764  1.00 83.07           C  
ATOM   2350  C   PHE B 319     121.038  80.992  -2.091  1.00 83.07           C  
ATOM   2351  O   PHE B 319     120.854  80.840  -0.896  1.00 83.07           O  
ATOM   2352  CB  PHE B 319     121.812  82.908  -3.499  1.00 83.07           C  
ATOM   2353  CG  PHE B 319     121.411  83.990  -4.429  1.00 83.07           C  
ATOM   2354  CD1 PHE B 319     120.677  85.065  -3.974  1.00 83.07           C  
ATOM   2355  CD2 PHE B 319     121.725  83.927  -5.758  1.00 83.07           C  
ATOM   2356  CE1 PHE B 319     120.271  86.070  -4.821  1.00 83.07           C  
ATOM   2357  CE2 PHE B 319     121.329  84.932  -6.613  1.00 83.07           C  
ATOM   2358  CZ  PHE B 319     120.597  86.006  -6.135  1.00 83.07           C  
ATOM   2359  N   ARG B 320     121.580  80.057  -2.860  1.00 83.07           N  
ATOM   2360  CA  ARG B 320     121.981  78.767  -2.317  1.00 83.07           C  
ATOM   2361  C   ARG B 320     122.926  77.998  -3.234  1.00 83.07           C  
ATOM   2362  O   ARG B 320     122.696  77.906  -4.442  1.00 83.07           O  
ATOM   2363  CB  ARG B 320     120.751  77.923  -1.999  1.00 83.07           C  
ATOM   2364  CG  ARG B 320     120.825  77.311  -0.642  1.00 83.07           C  
ATOM   2365  CD  ARG B 320     119.696  77.680   0.286  1.00 83.07           C  
ATOM   2366  NE  ARG B 320     119.474  76.562   1.188  1.00 83.07           N  
ATOM   2367  CZ  ARG B 320     118.469  75.707   1.083  1.00 83.07           C  
ATOM   2368  NH1 ARG B 320     117.544  75.861   0.134  1.00 83.07           N1+
ATOM   2369  NH2 ARG B 320     118.379  74.707   1.949  1.00 83.07           N  
ATOM   2370  N   GLY B 321     123.991  77.450  -2.658  1.00 83.07           N  
ATOM   2371  CA  GLY B 321     124.958  76.684  -3.425  1.00 83.07           C  
ATOM   2372  C   GLY B 321     126.303  77.355  -3.602  1.00 83.07           C  
ATOM   2373  O   GLY B 321     126.434  78.568  -3.494  1.00 83.07           O  
ATOM   2374  N   ARG B 322     127.319  76.554  -3.874  1.00 83.07           N  
ATOM   2375  CA  ARG B 322     128.639  77.102  -4.071  1.00 83.07           C  
ATOM   2376  C   ARG B 322     128.656  78.008  -5.312  1.00 83.07           C  
ATOM   2377  O   ARG B 322     128.689  77.532  -6.448  1.00 83.07           O  
ATOM   2378  CB  ARG B 322     129.680  75.982  -4.172  1.00 83.07           C  
ATOM   2379  N   MET B 323     128.573  79.316  -5.083  1.00 83.07           N  
ATOM   2380  CA  MET B 323     128.679  80.312  -6.157  1.00 83.07           C  
ATOM   2381  C   MET B 323     129.302  81.583  -5.580  1.00 83.07           C  
ATOM   2382  O   MET B 323     129.169  81.831  -4.379  1.00 83.07           O  
ATOM   2383  CB  MET B 323     127.323  80.604  -6.798  1.00 83.07           C  
ATOM   2384  CG  MET B 323     126.551  81.750  -6.167  1.00 83.07           C  
ATOM   2385  SD  MET B 323     125.125  81.145  -5.291  1.00 83.07           S  
ATOM   2386  CE  MET B 323     123.847  81.301  -6.524  1.00 83.07           C  
ATOM   2387  N   SER B 324     129.962  82.384  -6.423  1.00 83.07           N  
ATOM   2388  CA  SER B 324     130.641  83.608  -5.968  1.00 83.07           C  
ATOM   2389  C   SER B 324     129.732  84.837  -5.773  1.00 83.07           C  
ATOM   2390  O   SER B 324     129.192  85.369  -6.755  1.00 83.07           O  
ATOM   2391  CB  SER B 324     131.789  83.956  -6.924  1.00 83.07           C  
ATOM   2392  OG  SER B 324     131.284  84.377  -8.184  1.00 83.07           O  
ATOM   2393  N   MET B 325     129.590  85.285  -4.514  1.00 83.07           N  
ATOM   2394  CA  MET B 325     128.800  86.484  -4.154  1.00 83.07           C  
ATOM   2395  C   MET B 325     129.211  87.705  -5.027  1.00 83.07           C  
ATOM   2396  O   MET B 325     128.381  88.569  -5.333  1.00 83.07           O  
ATOM   2397  CB  MET B 325     128.864  86.799  -2.629  1.00 83.07           C  
ATOM   2398  CG  MET B 325     130.284  87.106  -2.069  1.00 83.07           C  
ATOM   2399  SD  MET B 325     130.639  88.827  -1.472  1.00 83.07           S  
ATOM   2400  CE  MET B 325     131.966  89.487  -2.721  1.00 83.07           C  
ATOM   2401  N   LYS B 326     130.488  87.760  -5.430  1.00 83.07           N  
ATOM   2402  CA  LYS B 326     130.980  88.806  -6.330  1.00 83.07           C  
ATOM   2403  C   LYS B 326     129.993  88.936  -7.499  1.00 83.07           C  
ATOM   2404  O   LYS B 326     129.599  90.047  -7.854  1.00 83.07           O  
ATOM   2405  CB  LYS B 326     132.400  88.476  -6.843  1.00 83.07           C  
ATOM   2406  N   GLU B 327     129.572  87.803  -8.069  1.00 83.07           N  
ATOM   2407  CA  GLU B 327     128.622  87.825  -9.170  1.00 83.07           C  
ATOM   2408  C   GLU B 327     127.231  88.210  -8.683  1.00 83.07           C  
ATOM   2409  O   GLU B 327     126.583  89.060  -9.287  1.00 83.07           O  
ATOM   2410  CB  GLU B 327     128.587  86.496  -9.928  1.00 83.07           C  
ATOM   2411  CG  GLU B 327     127.955  86.635 -11.313  1.00 83.07           C  
ATOM   2412  CD  GLU B 327     128.145  85.417 -12.208  1.00 83.07           C  
ATOM   2413  OE1 GLU B 327     127.698  84.315 -11.805  1.00 83.07           O  
ATOM   2414  OE2 GLU B 327     128.727  85.562 -13.318  1.00 83.07           O1-
ATOM   2415  N   VAL B 328     126.788  87.595  -7.589  1.00 83.07           N  
ATOM   2416  CA  VAL B 328     125.462  87.856  -7.022  1.00 83.07           C  
ATOM   2417  C   VAL B 328     125.208  89.358  -6.777  1.00 83.07           C  
ATOM   2418  O   VAL B 328     124.277  89.927  -7.349  1.00 83.07           O  
ATOM   2419  CB  VAL B 328     125.216  87.012  -5.738  1.00 83.07           C  
ATOM   2420  CG1 VAL B 328     123.984  87.488  -4.997  1.00 83.07           C  
ATOM   2421  CG2 VAL B 328     125.073  85.545  -6.087  1.00 83.07           C  
ATOM   2422  N   ASP B 329     126.054  89.994  -5.962  1.00 83.07           N  
ATOM   2423  CA  ASP B 329     125.928  91.421  -5.621  1.00 83.07           C  
ATOM   2424  C   ASP B 329     125.851  92.298  -6.869  1.00 83.07           C  
ATOM   2425  O   ASP B 329     125.196  93.346  -6.875  1.00 83.07           O  
ATOM   2426  CB  ASP B 329     127.097  91.860  -4.712  1.00 83.07           C  
ATOM   2427  CG  ASP B 329     126.904  91.439  -3.230  1.00 83.07           C  
ATOM   2428  OD1 ASP B 329     125.790  90.989  -2.840  1.00 83.07           O  
ATOM   2429  OD2 ASP B 329     127.822  91.527  -2.378  1.00 83.07           O1-
ATOM   2430  N   GLU B 330     126.518  91.821  -7.919  1.00 83.07           N  
ATOM   2431  CA  GLU B 330     126.604  92.469  -9.226  1.00 83.07           C  
ATOM   2432  C   GLU B 330     125.314  92.330 -10.021  1.00 83.07           C  
ATOM   2433  O   GLU B 330     124.836  93.297 -10.618  1.00 83.07           O  
ATOM   2434  CB  GLU B 330     127.737  91.833 -10.027  1.00 83.07           C  
ATOM   2435  CG  GLU B 330     128.282  92.678 -11.158  1.00 83.07           C  
ATOM   2436  CD  GLU B 330     129.774  92.475 -11.341  1.00 83.07           C  
ATOM   2437  OE1 GLU B 330     130.480  93.479 -11.577  1.00 83.07           O  
ATOM   2438  OE2 GLU B 330     130.243  91.316 -11.236  1.00 83.07           O1-
ATOM   2439  N   GLN B 331     124.777  91.117 -10.052  1.00 83.07           N  
ATOM   2440  CA  GLN B 331     123.545  90.846 -10.767  1.00 83.07           C  
ATOM   2441  C   GLN B 331     122.371  91.443 -10.013  1.00 83.07           C  
ATOM   2442  O   GLN B 331     121.464  91.999 -10.627  1.00 83.07           O  
ATOM   2443  CB  GLN B 331     123.346  89.346 -10.952  1.00 83.07           C  
ATOM   2444  CG  GLN B 331     124.149  88.731 -12.097  1.00 83.07           C  
ATOM   2445  CD  GLN B 331     123.757  89.263 -13.462  1.00 83.07           C  
ATOM   2446  NE2 GLN B 331     122.458  89.444 -13.685  1.00 83.07           N  
ATOM   2447  OE1 GLN B 331     124.623  89.498 -14.311  1.00 83.07           O  
ATOM   2448  N   MET B 332     122.400  91.338  -8.684  1.00 83.07           N  
ATOM   2449  CA  MET B 332     121.345  91.888  -7.827  1.00 83.07           C  
ATOM   2450  C   MET B 332     121.228  93.403  -7.967  1.00 83.07           C  
ATOM   2451  O   MET B 332     120.167  93.961  -7.704  1.00 83.07           O  
ATOM   2452  CB  MET B 332     121.568  91.537  -6.353  1.00 83.07           C  
ATOM   2453  CG  MET B 332     121.122  90.148  -5.945  1.00 83.07           C  
ATOM   2454  SD  MET B 332     119.399  89.670  -6.272  1.00 83.07           S  
ATOM   2455  CE  MET B 332     118.474  91.043  -5.640  1.00 83.07           C  
ATOM   2456  N   LEU B 333     122.321  94.068  -8.345  1.00 83.07           N  
ATOM   2457  CA  LEU B 333     122.291  95.510  -8.569  1.00 83.07           C  
ATOM   2458  C   LEU B 333     121.742  95.749  -9.971  1.00 83.07           C  
ATOM   2459  O   LEU B 333     120.992  96.699 -10.219  1.00 83.07           O  
ATOM   2460  CB  LEU B 333     123.684  96.119  -8.400  1.00 83.07           C  
ATOM   2461  CG  LEU B 333     123.758  97.444  -7.626  1.00 83.07           C  
ATOM   2462  CD1 LEU B 333     123.678  97.251  -6.092  1.00 83.07           C  
ATOM   2463  CD2 LEU B 333     125.004  98.251  -8.037  1.00 83.07           C  
ATOM   2464  N   ASN B 334     122.087  94.835 -10.870  1.00 83.07           N  
ATOM   2465  CA  ASN B 334     121.666  94.914 -12.258  1.00 83.07           C  
ATOM   2466  C   ASN B 334     120.189  94.650 -12.508  1.00 83.07           C  
ATOM   2467  O   ASN B 334     119.713  94.823 -13.625  1.00 83.07           O  
ATOM   2468  CB  ASN B 334     122.536  94.027 -13.150  1.00 83.07           C  
ATOM   2469  CG  ASN B 334     122.786  94.652 -14.515  1.00 83.07           C  
ATOM   2470  ND2 ASN B 334     121.905  94.343 -15.468  1.00 83.07           N  
ATOM   2471  OD1 ASN B 334     123.747  95.417 -14.709  1.00 83.07           O  
ATOM   2472  N   VAL B 335     119.462  94.214 -11.488  1.00 83.07           N  
ATOM   2473  CA  VAL B 335     118.031  93.995 -11.662  1.00 83.07           C  
ATOM   2474  C   VAL B 335     117.325  95.306 -11.363  1.00 83.07           C  
ATOM   2475  O   VAL B 335     116.522  95.792 -12.163  1.00 83.07           O  
ATOM   2476  CB  VAL B 335     117.474  92.873 -10.765  1.00 83.07           C  
ATOM   2477  CG1 VAL B 335     115.975  92.688 -11.015  1.00 83.07           C  
ATOM   2478  CG2 VAL B 335     118.223  91.557 -10.999  1.00 83.07           C  
ATOM   2479  N   GLN B 336     117.653  95.868 -10.201  1.00 83.07           N  
ATOM   2480  CA  GLN B 336     117.114  97.146  -9.748  1.00 83.07           C  
ATOM   2481  C   GLN B 336     117.893  98.253 -10.435  1.00 83.07           C  
ATOM   2482  O   GLN B 336     118.482  99.135  -9.805  1.00 83.07           O  
ATOM   2483  CB  GLN B 336     117.209  97.276  -8.232  1.00 83.07           C  
ATOM   2484  CG  GLN B 336     118.283  96.397  -7.626  1.00 83.07           C  
ATOM   2485  CD  GLN B 336     118.553  96.694  -6.171  1.00 83.07           C  
ATOM   2486  NE2 GLN B 336     119.649  96.142  -5.646  1.00 83.07           N  
ATOM   2487  OE1 GLN B 336     117.779  97.411  -5.520  1.00 83.07           O  
ATOM   2488  N   ASN B 337     117.900  98.158 -11.753  1.00 83.07           N  
ATOM   2489  CA  ASN B 337     118.528  99.123 -12.608  1.00 83.07           C  
ATOM   2490  C   ASN B 337     117.827  99.022 -13.947  1.00 83.07           C  
ATOM   2491  O   ASN B 337     117.276 100.010 -14.447  1.00 83.07           O  
ATOM   2492  CB  ASN B 337     120.014  98.845 -12.713  1.00 83.07           C  
ATOM   2493  CG  ASN B 337     120.809  99.701 -11.783  1.00 83.07           C  
ATOM   2494  ND2 ASN B 337     121.733  99.089 -11.060  1.00 83.07           N  
ATOM   2495  OD1 ASN B 337     120.589 100.907 -11.700  1.00 83.07           O  
ATOM   2496  N   LYS B 338     117.825  97.814 -14.512  1.00 83.07           N  
ATOM   2497  CA  LYS B 338     117.127  97.564 -15.761  1.00 83.07           C  
ATOM   2498  C   LYS B 338     115.663  97.657 -15.389  1.00 83.07           C  
ATOM   2499  O   LYS B 338     114.811  97.737 -16.263  1.00 83.07           O  
ATOM   2500  CB  LYS B 338     117.472  96.182 -16.340  1.00 83.07           C  
ATOM   2501  N   ASN B 339     115.395  97.675 -14.078  1.00 83.07           N  
ATOM   2502  CA  ASN B 339     114.046  97.796 -13.519  1.00 83.07           C  
ATOM   2503  C   ASN B 339     113.953  98.820 -12.370  1.00 83.07           C  
ATOM   2504  O   ASN B 339     112.971  98.845 -11.626  1.00 83.07           O  
ATOM   2505  CB  ASN B 339     113.567  96.427 -13.038  1.00 83.07           C  
ATOM   2506  CG  ASN B 339     113.007  95.554 -14.164  1.00 83.07           C  
ATOM   2507  ND2 ASN B 339     112.682  96.161 -15.310  1.00 83.07           N  
ATOM   2508  OD1 ASN B 339     112.846  94.340 -13.985  1.00 83.07           O  
ATOM   2509  N   SER B 340     114.964  99.685 -12.264  1.00 83.07           N  
ATOM   2510  CA  SER B 340     115.086 100.679 -11.184  1.00 83.07           C  
ATOM   2511  C   SER B 340     113.893 101.607 -10.928  1.00 83.07           C  
ATOM   2512  O   SER B 340     113.907 102.410 -10.003  1.00 83.07           O  
ATOM   2513  CB  SER B 340     116.399 101.476 -11.313  1.00 83.07           C  
ATOM   2514  OG  SER B 340     116.350 102.451 -12.338  1.00 83.07           O  
ATOM   2515  N   SER B 341     112.855 101.498 -11.728  1.00 83.07           N  
ATOM   2516  CA  SER B 341     111.702 102.324 -11.478  1.00 83.07           C  
ATOM   2517  C   SER B 341     110.746 101.615 -10.517  1.00 83.07           C  
ATOM   2518  O   SER B 341     109.962 102.275  -9.837  1.00 83.07           O  
ATOM   2519  CB  SER B 341     111.008 102.659 -12.791  1.00 83.07           C  
ATOM   2520  OG  SER B 341     111.933 102.621 -13.860  1.00 83.07           O  
ATOM   2521  N   TYR B 342     110.841 100.281 -10.438  1.00 83.07           N  
ATOM   2522  CA  TYR B 342     109.927  99.440  -9.625  1.00 83.07           C  
ATOM   2523  C   TYR B 342     110.337  99.143  -8.173  1.00 83.07           C  
ATOM   2524  O   TYR B 342     109.853  98.203  -7.524  1.00 83.07           O  
ATOM   2525  CB  TYR B 342     109.615  98.134 -10.354  1.00 83.07           C  
ATOM   2526  CG  TYR B 342     108.992  98.356 -11.695  1.00 83.07           C  
ATOM   2527  CD1 TYR B 342     108.551  97.291 -12.460  1.00 83.07           C  
ATOM   2528  CD2 TYR B 342     108.848  99.647 -12.206  1.00 83.07           C  
ATOM   2529  CE1 TYR B 342     107.985  97.511 -13.691  1.00 83.07           C  
ATOM   2530  CE2 TYR B 342     108.294  99.875 -13.434  1.00 83.07           C  
ATOM   2531  CZ  TYR B 342     107.863  98.806 -14.173  1.00 83.07           C  
ATOM   2532  OH  TYR B 342     107.304  99.044 -15.397  1.00 83.07           O  
ATOM   2533  N   PHE B 343     111.226  99.969  -7.665  1.00 83.07           N  
ATOM   2534  CA  PHE B 343     111.665  99.845  -6.307  1.00 83.07           C  
ATOM   2535  C   PHE B 343     111.465 101.208  -5.694  1.00 83.07           C  
ATOM   2536  O   PHE B 343     112.242 102.136  -5.951  1.00 83.07           O  
ATOM   2537  CB  PHE B 343     113.134  99.432  -6.274  1.00 83.07           C  
ATOM   2538  CG  PHE B 343     113.354  98.001  -6.625  1.00 83.07           C  
ATOM   2539  CD1 PHE B 343     113.534  97.615  -7.945  1.00 83.07           C  
ATOM   2540  CD2 PHE B 343     113.364  97.031  -5.634  1.00 83.07           C  
ATOM   2541  CE1 PHE B 343     113.727  96.281  -8.274  1.00 83.07           C  
ATOM   2542  CE2 PHE B 343     113.555  95.693  -5.947  1.00 83.07           C  
ATOM   2543  CZ  PHE B 343     113.734  95.316  -7.272  1.00 83.07           C  
ATOM   2544  N   VAL B 344     110.382 101.335  -4.940  1.00 83.07           N  
ATOM   2545  CA  VAL B 344     110.066 102.548  -4.208  1.00 83.07           C  
ATOM   2546  C   VAL B 344     111.354 103.281  -3.801  1.00 83.07           C  
ATOM   2547  O   VAL B 344     112.225 102.686  -3.176  1.00 83.07           O  
ATOM   2548  CB  VAL B 344     109.281 102.143  -2.964  1.00 83.07           C  
ATOM   2549  CG1 VAL B 344     109.503 103.111  -1.836  1.00 83.07           C  
ATOM   2550  CG2 VAL B 344     107.816 102.023  -3.289  1.00 83.07           C  
ATOM   2551  N   GLU B 345     111.500 104.555  -4.153  1.00 83.07           N  
ATOM   2552  CA  GLU B 345     112.741 105.264  -3.816  1.00 83.07           C  
ATOM   2553  C   GLU B 345     112.676 106.025  -2.508  1.00 83.07           C  
ATOM   2554  O   GLU B 345     113.588 106.778  -2.210  1.00 83.07           O  
ATOM   2555  CB  GLU B 345     113.232 106.186  -4.947  1.00 83.07           C  
ATOM   2556  CG  GLU B 345     112.567 105.966  -6.292  1.00 83.07           C  
ATOM   2557  CD  GLU B 345     111.194 106.627  -6.393  1.00 83.07           C  
ATOM   2558  OE1 GLU B 345     110.185 106.077  -5.870  1.00 83.07           O  
ATOM   2559  OE2 GLU B 345     111.124 107.708  -7.009  1.00 83.07           O1-
ATOM   2560  N   TRP B 346     111.613 105.844  -1.730  1.00 83.07           N  
ATOM   2561  CA  TRP B 346     111.541 106.526  -0.443  1.00 83.07           C  
ATOM   2562  C   TRP B 346     111.998 105.648   0.715  1.00 83.07           C  
ATOM   2563  O   TRP B 346     111.892 106.022   1.880  1.00 83.07           O  
ATOM   2564  CB  TRP B 346     110.186 107.191  -0.181  1.00 83.07           C  
ATOM   2565  CG  TRP B 346     109.017 106.432  -0.646  1.00 83.07           C  
ATOM   2566  CD1 TRP B 346     108.388 106.558  -1.840  1.00 83.07           C  
ATOM   2567  CD2 TRP B 346     108.302 105.439   0.081  1.00 83.07           C  
ATOM   2568  CE2 TRP B 346     107.254 104.991  -0.737  1.00 83.07           C  
ATOM   2569  CE3 TRP B 346     108.444 104.872   1.346  1.00 83.07           C  
ATOM   2570  NE1 TRP B 346     107.328 105.689  -1.911  1.00 83.07           N  
ATOM   2571  CZ2 TRP B 346     106.361 104.002  -0.335  1.00 83.07           C  
ATOM   2572  CZ3 TRP B 346     107.549 103.890   1.744  1.00 83.07           C  
ATOM   2573  CH2 TRP B 346     106.526 103.468   0.906  1.00 83.07           C  
ATOM   2574  N   ILE B 347     112.510 104.471   0.372  1.00 83.07           N  
ATOM   2575  CA  ILE B 347     113.100 103.539   1.321  1.00 83.07           C  
ATOM   2576  C   ILE B 347     114.439 103.197   0.687  1.00 83.07           C  
ATOM   2577  O   ILE B 347     114.464 102.577  -0.363  1.00 83.07           O  
ATOM   2578  CB  ILE B 347     112.258 102.283   1.445  1.00 83.07           C  
ATOM   2579  CG1 ILE B 347     111.056 102.520   2.344  1.00 83.07           C  
ATOM   2580  CG2 ILE B 347     113.080 101.184   2.026  1.00 83.07           C  
ATOM   2581  CD1 ILE B 347     110.131 101.314   2.432  1.00 83.07           C  
ATOM   2582  N   PRO B 348     115.537 103.625   1.294  1.00 83.07           N  
ATOM   2583  CA  PRO B 348     116.895 103.404   0.775  1.00 83.07           C  
ATOM   2584  C   PRO B 348     117.286 101.966   0.451  1.00 83.07           C  
ATOM   2585  O   PRO B 348     116.563 101.352  -0.302  1.00 83.07           O  
ATOM   2586  CB  PRO B 348     117.764 103.966   1.881  1.00 83.07           C  
ATOM   2587  CG  PRO B 348     116.916 105.032   2.405  1.00 83.07           C  
ATOM   2588  CD  PRO B 348     115.564 104.405   2.532  1.00 83.07           C  
ATOM   2589  N   ASN B 349     118.391 101.439   0.961  1.00 83.07           N  
ATOM   2590  CA  ASN B 349     118.805 100.096   0.573  1.00 83.07           C  
ATOM   2591  C   ASN B 349     117.765  99.097   0.958  1.00 83.07           C  
ATOM   2592  O   ASN B 349     117.921  98.370   1.921  1.00 83.07           O  
ATOM   2593  CB  ASN B 349     120.134  99.745   1.202  1.00 83.07           C  
ATOM   2594  CG  ASN B 349     121.047 100.949   1.317  1.00 83.07           C  
ATOM   2595  ND2 ASN B 349     121.906 101.148   0.316  1.00 83.07           N  
ATOM   2596  OD1 ASN B 349     120.963 101.713   2.284  1.00 83.07           O  
ATOM   2597  N   ASN B 350     116.707  99.069   0.163  1.00 83.07           N  
ATOM   2598  CA  ASN B 350     115.521  98.257   0.387  1.00 83.07           C  
ATOM   2599  C   ASN B 350     115.505  96.901  -0.285  1.00 83.07           C  
ATOM   2600  O   ASN B 350     114.449  96.330  -0.503  1.00 83.07           O  
ATOM   2601  CB  ASN B 350     114.296  99.047  -0.067  1.00 83.07           C  
ATOM   2602  CG  ASN B 350     114.158  99.095  -1.570  1.00 83.07           C  
ATOM   2603  ND2 ASN B 350     115.251  99.364  -2.276  1.00 83.07           N  
ATOM   2604  OD1 ASN B 350     113.081  98.886  -2.088  1.00 83.07           O  
ATOM   2605  N   VAL B 351     116.664  96.379  -0.622  1.00 83.07           N  
ATOM   2606  CA  VAL B 351     116.711  95.073  -1.234  1.00 83.07           C  
ATOM   2607  C   VAL B 351     117.992  94.417  -0.728  1.00 83.07           C  
ATOM   2608  O   VAL B 351     119.105  94.843  -1.049  1.00 83.07           O  
ATOM   2609  CB  VAL B 351     116.582  95.190  -2.762  1.00 83.07           C  
ATOM   2610  CG1 VAL B 351     117.492  96.276  -3.269  1.00 83.07           C  
ATOM   2611  CG2 VAL B 351     116.827  93.860  -3.452  1.00 83.07           C  
ATOM   2612  N   LYS B 352     117.819  93.407   0.117  1.00 83.07           N  
ATOM   2613  CA  LYS B 352     118.942  92.723   0.734  1.00 83.07           C  
ATOM   2614  C   LYS B 352     119.036  91.278   0.323  1.00 83.07           C  
ATOM   2615  O   LYS B 352     118.025  90.587   0.235  1.00 83.07           O  
ATOM   2616  CB  LYS B 352     118.856  92.839   2.244  1.00 83.07           C  
ATOM   2617  CG  LYS B 352     119.248  94.224   2.740  1.00 83.07           C  
ATOM   2618  CD  LYS B 352     120.778  94.409   2.862  1.00 83.07           C  
ATOM   2619  CE  LYS B 352     121.149  95.531   3.844  1.00 83.07           C  
ATOM   2620  NZ  LYS B 352     120.600  96.888   3.511  1.00 83.07           N1+
ATOM   2621  N   THR B 353     120.270  90.830   0.093  1.00 83.07           N  
ATOM   2622  CA  THR B 353     120.544  89.480  -0.386  1.00 83.07           C  
ATOM   2623  C   THR B 353     121.438  88.688   0.526  1.00 83.07           C  
ATOM   2624  O   THR B 353     122.442  89.191   1.025  1.00 83.07           O  
ATOM   2625  CB  THR B 353     121.194  89.550  -1.740  1.00 83.07           C  
ATOM   2626  CG2 THR B 353     120.190  90.033  -2.753  1.00 83.07           C  
ATOM   2627  OG1 THR B 353     122.185  90.585  -1.729  1.00 83.07           O  
ATOM   2628  N   ALA B 354     121.062  87.429   0.711  1.00 83.07           N  
ATOM   2629  CA  ALA B 354     121.762  86.513   1.592  1.00 83.07           C  
ATOM   2630  C   ALA B 354     122.163  85.303   0.800  1.00 83.07           C  
ATOM   2631  O   ALA B 354     121.385  84.826  -0.028  1.00 83.07           O  
ATOM   2632  CB  ALA B 354     120.849  86.089   2.720  1.00 83.07           C  
ATOM   2633  N   VAL B 355     123.367  84.799   1.052  1.00 83.07           N  
ATOM   2634  CA  VAL B 355     123.826  83.612   0.351  1.00 83.07           C  
ATOM   2635  C   VAL B 355     124.214  82.545   1.337  1.00 83.07           C  
ATOM   2636  O   VAL B 355     124.824  82.839   2.347  1.00 83.07           O  
ATOM   2637  CB  VAL B 355     124.998  83.907  -0.616  1.00 83.07           C  
ATOM   2638  CG1 VAL B 355     124.500  84.620  -1.856  1.00 83.07           C  
ATOM   2639  CG2 VAL B 355     126.098  84.733   0.046  1.00 83.07           C  
ATOM   2640  N   CYS B 356     123.815  81.314   1.052  1.00 83.07           N  
ATOM   2641  CA  CYS B 356     124.164  80.163   1.872  1.00 83.07           C  
ATOM   2642  C   CYS B 356     124.678  79.078   0.936  1.00 83.07           C  
ATOM   2643  O   CYS B 356     124.189  78.955  -0.183  1.00 83.07           O  
ATOM   2644  CB  CYS B 356     122.967  79.661   2.659  1.00 83.07           C  
ATOM   2645  SG  CYS B 356     123.304  78.063   3.429  1.00 83.07           S  
ATOM   2646  N   ASP B 357     125.628  78.265   1.386  1.00 83.07           N  
ATOM   2647  CA  ASP B 357     126.241  77.303   0.471  1.00 83.07           C  
ATOM   2648  C   ASP B 357     125.880  75.834   0.602  1.00 83.07           C  
ATOM   2649  O   ASP B 357     126.650  74.976   0.168  1.00 83.07           O  
ATOM   2650  CB  ASP B 357     127.766  77.483   0.429  1.00 83.07           C  
ATOM   2651  CG  ASP B 357     128.312  78.167   1.669  1.00 83.07           C  
ATOM   2652  OD1 ASP B 357     129.554  78.369   1.722  1.00 83.07           O  
ATOM   2653  OD2 ASP B 357     127.578  78.528   2.631  1.00 83.07           O1-
ATOM   2654  N   ILE B 358     124.725  75.526   1.181  1.00 83.07           N  
ATOM   2655  CA  ILE B 358     124.285  74.131   1.239  1.00 83.07           C  
ATOM   2656  C   ILE B 358     123.083  73.914   0.293  1.00 83.07           C  
ATOM   2657  O   ILE B 358     121.948  74.280   0.610  1.00 83.07           O  
ATOM   2658  CB  ILE B 358     124.027  73.653   2.698  1.00 83.07           C  
ATOM   2659  CG1 ILE B 358     124.090  72.112   2.792  1.00 83.07           C  
ATOM   2660  CG2 ILE B 358     122.710  74.226   3.230  1.00 83.07           C  
ATOM   2661  CD1 ILE B 358     125.428  71.543   3.288  1.00 83.07           C  
ATOM   2662  N   PRO B 359     123.375  73.333  -0.882  1.00 83.07           N  
ATOM   2663  CA  PRO B 359     122.366  73.061  -1.915  1.00 83.07           C  
ATOM   2664  C   PRO B 359     121.118  72.364  -1.402  1.00 83.07           C  
ATOM   2665  O   PRO B 359     121.200  71.575  -0.459  1.00 83.07           O  
ATOM   2666  CB  PRO B 359     123.096  72.112  -2.873  1.00 83.07           C  
ATOM   2667  CG  PRO B 359     124.515  72.489  -2.759  1.00 83.07           C  
ATOM   2668  CD  PRO B 359     124.726  72.951  -1.340  1.00 83.07           C  
ATOM   2669  N   PRO B 360     119.970  72.702  -1.977  1.00 83.07           N  
ATOM   2670  CA  PRO B 360     118.704  72.023  -1.655  1.00 83.07           C  
ATOM   2671  C   PRO B 360     118.636  70.599  -2.257  1.00 83.07           C  
ATOM   2672  O   PRO B 360     119.690  70.028  -2.598  1.00 83.07           O  
ATOM   2673  CB  PRO B 360     117.647  72.947  -2.281  1.00 83.07           C  
ATOM   2674  CG  PRO B 360     118.368  74.245  -2.504  1.00 83.07           C  
ATOM   2675  CD  PRO B 360     119.772  73.872  -2.856  1.00 83.07           C  
TER    2676      PRO B 360 
ATOM   2677  N   ARG B 369     117.419  70.036  -2.354  1.00 83.07           N  
ATOM   2678  CA  ARG B 369     117.187  68.728  -3.000  1.00 83.07           C  
ATOM   2679  C   ARG B 369     117.816  68.830  -4.397  1.00 83.07           C  
ATOM   2680  O   ARG B 369     118.178  69.930  -4.802  1.00 83.07           O  
ATOM   2681  CB  ARG B 369     115.677  68.434  -3.094  1.00 83.07           C  
ATOM   2682  N   GLY B 370     117.980  67.736  -5.140  1.00 83.07           N  
ATOM   2683  CA  GLY B 370     118.608  67.825  -6.467  1.00 83.07           C  
ATOM   2684  C   GLY B 370     119.477  69.084  -6.563  1.00 83.07           C  
ATOM   2685  O   GLY B 370     120.525  69.169  -5.918  1.00 83.07           O  
ATOM   2686  N   LEU B 371     119.010  70.055  -7.350  1.00 83.07           N  
ATOM   2687  CA  LEU B 371     119.600  71.399  -7.549  1.00 83.07           C  
ATOM   2688  C   LEU B 371     121.039  71.732  -7.093  1.00 83.07           C  
ATOM   2689  O   LEU B 371     121.330  71.751  -5.891  1.00 83.07           O  
ATOM   2690  CB  LEU B 371     118.650  72.449  -6.947  1.00 83.07           C  
ATOM   2691  CG  LEU B 371     117.155  72.456  -7.319  1.00 83.07           C  
ATOM   2692  CD1 LEU B 371     116.900  71.976  -8.755  1.00 83.07           C  
ATOM   2693  CD2 LEU B 371     116.296  71.665  -6.324  1.00 83.07           C  
ATOM   2694  N   LYS B 372     121.899  72.037  -8.049  1.00 83.07           N  
ATOM   2695  CA  LYS B 372     123.275  72.455  -7.766  1.00 83.07           C  
ATOM   2696  C   LYS B 372     123.278  73.930  -7.316  1.00 83.07           C  
ATOM   2697  O   LYS B 372     124.061  74.337  -6.459  1.00 83.07           O  
ATOM   2698  CB  LYS B 372     124.173  72.245  -9.001  1.00 83.07           C  
ATOM   2699  N   MET B 373     122.366  74.707  -7.890  1.00 83.07           N  
ATOM   2700  CA  MET B 373     122.211  76.126  -7.619  1.00 83.07           C  
ATOM   2701  C   MET B 373     120.748  76.391  -7.368  1.00 83.07           C  
ATOM   2702  O   MET B 373     119.904  75.736  -7.963  1.00 83.07           O  
ATOM   2703  CB  MET B 373     122.597  76.900  -8.860  1.00 83.07           C  
ATOM   2704  CG  MET B 373     123.170  78.246  -8.595  1.00 83.07           C  
ATOM   2705  SD  MET B 373     124.952  78.135  -8.668  1.00 83.07           S  
ATOM   2706  CE  MET B 373     125.301  78.104 -10.489  1.00 83.07           C  
ATOM   2707  N   SER B 374     120.438  77.364  -6.517  1.00 83.07           N  
ATOM   2708  CA  SER B 374     119.041  77.707  -6.196  1.00 83.07           C  
ATOM   2709  C   SER B 374     118.898  79.090  -5.577  1.00 83.07           C  
ATOM   2710  O   SER B 374     119.818  79.582  -4.937  1.00 83.07           O  
ATOM   2711  CB  SER B 374     118.436  76.687  -5.219  1.00 83.07           C  
ATOM   2712  OG  SER B 374     117.574  77.312  -4.265  1.00 83.07           O  
ATOM   2713  N   ALA B 375     117.737  79.706  -5.751  1.00 83.07           N  
ATOM   2714  CA  ALA B 375     117.471  80.999  -5.147  1.00 83.07           C  
ATOM   2715  C   ALA B 375     116.012  81.065  -4.818  1.00 83.07           C  
ATOM   2716  O   ALA B 375     115.202  80.357  -5.398  1.00 83.07           O  
ATOM   2717  CB  ALA B 375     117.822  82.108  -6.074  1.00 83.07           C  
ATOM   2718  N   THR B 376     115.669  81.906  -3.864  1.00 83.07           N  
ATOM   2719  CA  THR B 376     114.281  82.081  -3.510  1.00 83.07           C  
ATOM   2720  C   THR B 376     114.117  83.561  -3.213  1.00 83.07           C  
ATOM   2721  O   THR B 376     115.103  84.267  -3.021  1.00 83.07           O  
ATOM   2722  CB  THR B 376     113.873  81.149  -2.380  1.00 83.07           C  
ATOM   2723  CG2 THR B 376     115.087  80.433  -1.806  1.00 83.07           C  
ATOM   2724  OG1 THR B 376     113.380  81.917  -1.290  1.00 83.07           O  
ATOM   2725  N   PHE B 377     112.884  84.041  -3.175  1.00 83.07           N  
ATOM   2726  CA  PHE B 377     112.658  85.472  -3.106  1.00 83.07           C  
ATOM   2727  C   PHE B 377     111.465  85.822  -2.270  1.00 83.07           C  
ATOM   2728  O   PHE B 377     110.429  85.204  -2.406  1.00 83.07           O  
ATOM   2729  CB  PHE B 377     112.454  85.932  -4.550  1.00 83.07           C  
ATOM   2730  CG  PHE B 377     111.595  87.141  -4.721  1.00 83.07           C  
ATOM   2731  CD1 PHE B 377     112.164  88.410  -4.731  1.00 83.07           C  
ATOM   2732  CD2 PHE B 377     110.233  87.016  -4.949  1.00 83.07           C  
ATOM   2733  CE1 PHE B 377     111.379  89.544  -4.917  1.00 83.07           C  
ATOM   2734  CE2 PHE B 377     109.437  88.148  -5.130  1.00 83.07           C  
ATOM   2735  CZ  PHE B 377     110.009  89.414  -5.119  1.00 83.07           C  
ATOM   2736  N   ILE B 378     111.605  86.826  -1.419  1.00 83.07           N  
ATOM   2737  CA  ILE B 378     110.507  87.282  -0.574  1.00 83.07           C  
ATOM   2738  C   ILE B 378     110.176  88.718  -0.955  1.00 83.07           C  
ATOM   2739  O   ILE B 378     111.038  89.585  -0.911  1.00 83.07           O  
ATOM   2740  CB  ILE B 378     110.909  87.173   0.909  1.00 83.07           C  
ATOM   2741  CG1 ILE B 378     110.879  85.718   1.360  1.00 83.07           C  
ATOM   2742  CG2 ILE B 378     110.004  88.015   1.801  1.00 83.07           C  
ATOM   2743  CD1 ILE B 378     111.478  85.497   2.723  1.00 83.07           C  
ATOM   2744  N   GLY B 379     108.936  88.988  -1.331  1.00 83.07           N  
ATOM   2745  CA  GLY B 379     108.620  90.340  -1.733  1.00 83.07           C  
ATOM   2746  C   GLY B 379     107.404  91.053  -1.174  1.00 83.07           C  
ATOM   2747  O   GLY B 379     106.256  90.614  -1.369  1.00 83.07           O  
ATOM   2748  N   ASN B 380     107.654  92.169  -0.491  1.00 83.07           N  
ATOM   2749  CA  ASN B 380     106.574  93.007  -0.007  1.00 83.07           C  
ATOM   2750  C   ASN B 380     106.221  93.995  -1.100  1.00 83.07           C  
ATOM   2751  O   ASN B 380     106.742  95.104  -1.110  1.00 83.07           O  
ATOM   2752  CB  ASN B 380     106.982  93.762   1.250  1.00 83.07           C  
ATOM   2753  CG  ASN B 380     105.778  94.195   2.095  1.00 83.07           C  
ATOM   2754  ND2 ASN B 380     104.577  94.191   1.507  1.00 83.07           N  
ATOM   2755  OD1 ASN B 380     105.933  94.523   3.263  1.00 83.07           O  
ATOM   2756  N   SER B 381     105.332  93.599  -2.011  1.00 83.07           N  
ATOM   2757  CA  SER B 381     104.980  94.445  -3.160  1.00 83.07           C  
ATOM   2758  C   SER B 381     103.525  94.825  -3.262  1.00 83.07           C  
ATOM   2759  O   SER B 381     102.663  93.956  -3.224  1.00 83.07           O  
ATOM   2760  CB  SER B 381     105.364  93.762  -4.470  1.00 83.07           C  
ATOM   2761  OG  SER B 381     104.695  94.352  -5.576  1.00 83.07           O  
ATOM   2762  N   THR B 382     103.277  96.114  -3.485  1.00 83.07           N  
ATOM   2763  CA  THR B 382     101.932  96.678  -3.575  1.00 83.07           C  
ATOM   2764  C   THR B 382     101.092  96.057  -4.660  1.00 83.07           C  
ATOM   2765  O   THR B 382      99.925  96.387  -4.802  1.00 83.07           O  
ATOM   2766  CB  THR B 382     102.012  98.169  -3.822  1.00 83.07           C  
ATOM   2767  CG2 THR B 382     102.790  98.842  -2.721  1.00 83.07           C  
ATOM   2768  OG1 THR B 382     102.826  98.404  -4.975  1.00 83.07           O  
ATOM   2769  N   ALA B 383     101.698  95.163  -5.428  1.00 83.07           N  
ATOM   2770  CA  ALA B 383     101.014  94.466  -6.505  1.00 83.07           C  
ATOM   2771  C   ALA B 383     100.188  93.348  -5.926  1.00 83.07           C  
ATOM   2772  O   ALA B 383      99.298  92.822  -6.594  1.00 83.07           O  
ATOM   2773  CB  ALA B 383     102.009  93.910  -7.489  1.00 83.07           C  
ATOM   2774  N   ILE B 384     100.515  92.970  -4.692  1.00 83.07           N  
ATOM   2775  CA  ILE B 384      99.768  91.965  -3.961  1.00 83.07           C  
ATOM   2776  C   ILE B 384      98.309  92.438  -3.898  1.00 83.07           C  
ATOM   2777  O   ILE B 384      97.389  91.633  -3.837  1.00 83.07           O  
ATOM   2778  CB  ILE B 384     100.407  91.753  -2.571  1.00 83.07           C  
ATOM   2779  CG1 ILE B 384     100.858  90.297  -2.375  1.00 83.07           C  
ATOM   2780  CG2 ILE B 384      99.532  92.315  -1.446  1.00 83.07           C  
ATOM   2781  CD1 ILE B 384      99.751  89.257  -2.342  1.00 83.07           C  
ATOM   2782  N   GLN B 385      98.117  93.757  -3.968  1.00 83.07           N  
ATOM   2783  CA  GLN B 385      96.801  94.396  -3.993  1.00 83.07           C  
ATOM   2784  C   GLN B 385      95.906  93.623  -4.947  1.00 83.07           C  
ATOM   2785  O   GLN B 385      94.768  93.304  -4.631  1.00 83.07           O  
ATOM   2786  CB  GLN B 385      96.959  95.856  -4.444  1.00 83.07           C  
ATOM   2787  CG  GLN B 385      95.680  96.644  -4.656  1.00 83.07           C  
ATOM   2788  CD  GLN B 385      95.790  97.694  -5.767  1.00 83.07           C  
ATOM   2789  NE2 GLN B 385      94.650  98.137  -6.288  1.00 83.07           N  
ATOM   2790  OE1 GLN B 385      96.886  98.094  -6.142  1.00 83.07           O  
ATOM   2791  N   GLU B 386      96.473  93.286  -6.098  1.00 83.07           N  
ATOM   2792  CA  GLU B 386      95.804  92.559  -7.170  1.00 83.07           C  
ATOM   2793  C   GLU B 386      95.150  91.283  -6.710  1.00 83.07           C  
ATOM   2794  O   GLU B 386      94.097  90.923  -7.223  1.00 83.07           O  
ATOM   2795  CB  GLU B 386      96.814  92.206  -8.271  1.00 83.07           C  
ATOM   2796  CG  GLU B 386      96.618  92.936  -9.608  1.00 83.07           C  
ATOM   2797  CD  GLU B 386      97.737  92.651 -10.619  1.00 83.07           C  
ATOM   2798  OE1 GLU B 386      97.670  93.195 -11.760  1.00 83.07           O  
ATOM   2799  OE2 GLU B 386      98.680  91.880 -10.269  1.00 83.07           O1-
ATOM   2800  N   LEU B 387      95.796  90.595  -5.771  1.00 83.07           N  
ATOM   2801  CA  LEU B 387      95.289  89.334  -5.235  1.00 83.07           C  
ATOM   2802  C   LEU B 387      94.096  89.558  -4.324  1.00 83.07           C  
ATOM   2803  O   LEU B 387      93.082  88.884  -4.471  1.00 83.07           O  
ATOM   2804  CB  LEU B 387      96.385  88.574  -4.482  1.00 83.07           C  
ATOM   2805  CG  LEU B 387      96.099  87.279  -3.703  1.00 83.07           C  
ATOM   2806  CD1 LEU B 387      97.344  86.388  -3.754  1.00 83.07           C  
ATOM   2807  CD2 LEU B 387      95.684  87.539  -2.239  1.00 83.07           C  
ATOM   2808  N   PHE B 388      94.222  90.490  -3.380  1.00 83.07           N  
ATOM   2809  CA  PHE B 388      93.129  90.782  -2.462  1.00 83.07           C  
ATOM   2810  C   PHE B 388      91.901  91.246  -3.231  1.00 83.07           C  
ATOM   2811  O   PHE B 388      90.779  90.832  -2.936  1.00 83.07           O  
ATOM   2812  CB  PHE B 388      93.560  91.790  -1.404  1.00 83.07           C  
ATOM   2813  CG  PHE B 388      94.582  91.239  -0.427  1.00 83.07           C  
ATOM   2814  CD1 PHE B 388      95.827  91.866  -0.255  1.00 83.07           C  
ATOM   2815  CD2 PHE B 388      94.314  90.086   0.320  1.00 83.07           C  
ATOM   2816  CE1 PHE B 388      96.797  91.355   0.656  1.00 83.07           C  
ATOM   2817  CE2 PHE B 388      95.262  89.569   1.233  1.00 83.07           C  
ATOM   2818  CZ  PHE B 388      96.509  90.206   1.398  1.00 83.07           C  
ATOM   2819  N   LYS B 389      92.131  92.059  -4.256  1.00 83.07           N  
ATOM   2820  CA  LYS B 389      91.069  92.573  -5.103  1.00 83.07           C  
ATOM   2821  C   LYS B 389      90.249  91.470  -5.766  1.00 83.07           C  
ATOM   2822  O   LYS B 389      89.026  91.577  -5.849  1.00 83.07           O  
ATOM   2823  CB  LYS B 389      91.672  93.467  -6.176  1.00 83.07           C  
ATOM   2824  CG  LYS B 389      91.754  94.917  -5.798  1.00 83.07           C  
ATOM   2825  CD  LYS B 389      92.379  95.726  -6.916  1.00 83.07           C  
ATOM   2826  CE  LYS B 389      91.356  96.028  -8.004  1.00 83.07           C  
ATOM   2827  NZ  LYS B 389      91.930  96.755  -9.171  1.00 83.07           N1+
ATOM   2828  N   ARG B 390      90.926  90.415  -6.225  1.00 83.07           N  
ATOM   2829  CA  ARG B 390      90.259  89.324  -6.958  1.00 83.07           C  
ATOM   2830  C   ARG B 390      89.473  88.361  -6.080  1.00 83.07           C  
ATOM   2831  O   ARG B 390      88.568  87.685  -6.575  1.00 83.07           O  
ATOM   2832  CB  ARG B 390      91.191  88.589  -7.961  1.00 83.07           C  
ATOM   2833  CG  ARG B 390      92.589  88.197  -7.446  1.00 83.07           C  
ATOM   2834  CD  ARG B 390      93.247  87.016  -8.193  1.00 83.07           C  
ATOM   2835  NE  ARG B 390      92.645  85.749  -7.744  1.00 83.07           N  
ATOM   2836  CZ  ARG B 390      93.313  84.636  -7.427  1.00 83.07           C  
ATOM   2837  NH1 ARG B 390      94.646  84.603  -7.525  1.00 83.07           N1+
ATOM   2838  NH2 ARG B 390      92.631  83.552  -7.022  1.00 83.07           N  
ATOM   2839  N   ILE B 391      89.813  88.278  -4.795  1.00 83.07           N  
ATOM   2840  CA  ILE B 391      89.007  87.450  -3.907  1.00 83.07           C  
ATOM   2841  C   ILE B 391      87.844  88.309  -3.435  1.00 83.07           C  
ATOM   2842  O   ILE B 391      86.746  87.803  -3.239  1.00 83.07           O  
ATOM   2843  CB  ILE B 391      89.786  86.804  -2.706  1.00 83.07           C  
ATOM   2844  CG1 ILE B 391      90.151  87.836  -1.640  1.00 83.07           C  
ATOM   2845  CG2 ILE B 391      90.991  85.949  -3.176  1.00 83.07           C  
ATOM   2846  CD1 ILE B 391      89.183  87.862  -0.492  1.00 83.07           C  
ATOM   2847  N   SER B 392      88.079  89.612  -3.277  1.00 83.07           N  
ATOM   2848  CA  SER B 392      87.014  90.547  -2.876  1.00 83.07           C  
ATOM   2849  C   SER B 392      85.973  90.747  -4.005  1.00 83.07           C  
ATOM   2850  O   SER B 392      84.867  91.258  -3.797  1.00 83.07           O  
ATOM   2851  CB  SER B 392      87.624  91.883  -2.436  1.00 83.07           C  
ATOM   2852  OG  SER B 392      86.649  92.911  -2.372  1.00 83.07           O  
ATOM   2853  N   GLU B 393      86.366  90.311  -5.194  1.00 83.07           N  
ATOM   2854  CA  GLU B 393      85.573  90.388  -6.406  1.00 83.07           C  
ATOM   2855  C   GLU B 393      84.506  89.307  -6.469  1.00 83.07           C  
ATOM   2856  O   GLU B 393      83.405  89.551  -6.975  1.00 83.07           O  
ATOM   2857  CB  GLU B 393      86.503  90.217  -7.596  1.00 83.07           C  
ATOM   2858  CG  GLU B 393      86.027  90.898  -8.859  1.00 83.07           C  
ATOM   2859  CD  GLU B 393      87.182  91.333  -9.749  1.00 83.07           C  
ATOM   2860  OE1 GLU B 393      88.365  91.356  -9.278  1.00 83.07           O  
ATOM   2861  OE2 GLU B 393      86.889  91.654 -10.933  1.00 83.07           O1-
ATOM   2862  N   GLN B 394      84.867  88.107  -6.007  1.00 83.07           N  
ATOM   2863  CA  GLN B 394      83.951  86.975  -5.976  1.00 83.07           C  
ATOM   2864  C   GLN B 394      83.187  87.041  -4.673  1.00 83.07           C  
ATOM   2865  O   GLN B 394      82.144  86.403  -4.534  1.00 83.07           O  
ATOM   2866  CB  GLN B 394      84.662  85.610  -6.064  1.00 83.07           C  
ATOM   2867  CG  GLN B 394      85.766  85.452  -7.118  1.00 83.07           C  
ATOM   2868  CD  GLN B 394      86.983  84.648  -6.599  1.00 83.07           C  
ATOM   2869  NE2 GLN B 394      87.966  84.444  -7.474  1.00 83.07           N  
ATOM   2870  OE1 GLN B 394      87.029  84.224  -5.431  1.00 83.07           O  
ATOM   2871  N   PHE B 395      83.701  87.798  -3.707  1.00 83.07           N  
ATOM   2872  CA  PHE B 395      83.012  87.910  -2.429  1.00 83.07           C  
ATOM   2873  C   PHE B 395      81.784  88.813  -2.578  1.00 83.07           C  
ATOM   2874  O   PHE B 395      80.646  88.339  -2.455  1.00 83.07           O  
ATOM   2875  CB  PHE B 395      83.946  88.392  -1.318  1.00 83.07           C  
ATOM   2876  CG  PHE B 395      83.271  88.524   0.011  1.00 83.07           C  
ATOM   2877  CD1 PHE B 395      83.245  87.464   0.894  1.00 83.07           C  
ATOM   2878  CD2 PHE B 395      82.637  89.708   0.371  1.00 83.07           C  
ATOM   2879  CE1 PHE B 395      82.606  87.586   2.118  1.00 83.07           C  
ATOM   2880  CE2 PHE B 395      81.998  89.838   1.587  1.00 83.07           C  
ATOM   2881  CZ  PHE B 395      81.982  88.779   2.460  1.00 83.07           C  
ATOM   2882  N   THR B 396      82.029  90.097  -2.868  1.00 83.07           N  
ATOM   2883  CA  THR B 396      80.968  91.105  -3.068  1.00 83.07           C  
ATOM   2884  C   THR B 396      80.084  90.728  -4.247  1.00 83.07           C  
ATOM   2885  O   THR B 396      79.000  91.282  -4.427  1.00 83.07           O  
ATOM   2886  CB  THR B 396      81.557  92.535  -3.303  1.00 83.07           C  
ATOM   2887  CG2 THR B 396      80.464  93.624  -3.114  1.00 83.07           C  
ATOM   2888  OG1 THR B 396      82.549  92.848  -2.306  1.00 83.07           O  
ATOM   2889  N   ALA B 397      80.577  89.791  -5.048  1.00 83.07           N  
ATOM   2890  CA  ALA B 397      79.852  89.280  -6.195  1.00 83.07           C  
ATOM   2891  C   ALA B 397      78.835  88.219  -5.763  1.00 83.07           C  
ATOM   2892  O   ALA B 397      77.911  87.897  -6.519  1.00 83.07           O  
ATOM   2893  CB  ALA B 397      80.828  88.711  -7.214  1.00 83.07           C  
ATOM   2894  N   MET B 398      79.012  87.700  -4.547  1.00 83.07           N  
ATOM   2895  CA  MET B 398      78.145  86.678  -3.975  1.00 83.07           C  
ATOM   2896  C   MET B 398      77.359  87.244  -2.798  1.00 83.07           C  
ATOM   2897  O   MET B 398      76.168  87.012  -2.660  1.00 83.07           O  
ATOM   2898  CB  MET B 398      78.989  85.496  -3.501  1.00 83.07           C  
ATOM   2899  CG  MET B 398      78.816  84.214  -4.293  1.00 83.07           C  
ATOM   2900  SD  MET B 398      79.590  82.853  -3.394  1.00 83.07           S  
ATOM   2901  CE  MET B 398      81.144  82.715  -4.272  1.00 83.07           C  
ATOM   2902  N   PHE B 399      78.037  87.993  -1.945  1.00 83.07           N  
ATOM   2903  CA  PHE B 399      77.404  88.580  -0.780  1.00 83.07           C  
ATOM   2904  C   PHE B 399      76.446  89.679  -1.189  1.00 83.07           C  
ATOM   2905  O   PHE B 399      75.730  90.238  -0.367  1.00 83.07           O  
ATOM   2906  CB  PHE B 399      78.471  89.113   0.157  1.00 83.07           C  
ATOM   2907  CG  PHE B 399      77.929  89.701   1.417  1.00 83.07           C  
ATOM   2908  CD1 PHE B 399      77.409  88.886   2.410  1.00 83.07           C  
ATOM   2909  CD2 PHE B 399      77.948  91.077   1.619  1.00 83.07           C  
ATOM   2910  CE1 PHE B 399      76.907  89.439   3.584  1.00 83.07           C  
ATOM   2911  CE2 PHE B 399      77.448  91.639   2.791  1.00 83.07           C  
ATOM   2912  CZ  PHE B 399      76.926  90.821   3.772  1.00 83.07           C  
ATOM   2913  N   ARG B 400      76.467  89.988  -2.476  1.00 83.07           N  
ATOM   2914  CA  ARG B 400      75.568  90.945  -3.098  1.00 83.07           C  
ATOM   2915  C   ARG B 400      74.152  90.568  -2.646  1.00 83.07           C  
ATOM   2916  O   ARG B 400      73.638  91.086  -1.652  1.00 83.07           O  
ATOM   2917  CB  ARG B 400      75.709  90.801  -4.624  1.00 83.07           C  
ATOM   2918  CG  ARG B 400      74.789  91.636  -5.524  1.00 83.07           C  
ATOM   2919  CD  ARG B 400      75.554  92.296  -6.632  1.00 83.07           C  
ATOM   2920  NE  ARG B 400      76.849  92.710  -6.094  1.00 83.07           N  
ATOM   2921  CZ  ARG B 400      77.484  93.842  -6.397  1.00 83.07           C  
ATOM   2922  NH1 ARG B 400      76.955  94.692  -7.281  1.00 83.07           N1+
ATOM   2923  NH2 ARG B 400      78.660  94.121  -5.819  1.00 83.07           N  
ATOM   2924  N   ARG B 401      73.555  89.632  -3.380  1.00 83.07           N  
ATOM   2925  CA  ARG B 401      72.235  89.093  -3.118  1.00 83.07           C  
ATOM   2926  C   ARG B 401      72.402  87.944  -2.117  1.00 83.07           C  
ATOM   2927  O   ARG B 401      71.994  86.821  -2.391  1.00 83.07           O  
ATOM   2928  CB  ARG B 401      71.666  88.575  -4.437  1.00 83.07           C  
ATOM   2929  CG  ARG B 401      70.557  89.396  -4.978  1.00 83.07           C  
ATOM   2930  CD  ARG B 401      69.246  88.636  -5.071  1.00 83.07           C  
ATOM   2931  NE  ARG B 401      69.138  87.812  -6.280  1.00 83.07           N  
ATOM   2932  CZ  ARG B 401      69.350  88.236  -7.536  1.00 83.07           C  
ATOM   2933  NH1 ARG B 401      69.708  89.489  -7.789  1.00 83.07           N1+
ATOM   2934  NH2 ARG B 401      69.205  87.397  -8.556  1.00 83.07           N  
ATOM   2935  N   LYS B 402      73.026  88.239  -0.974  1.00 83.07           N  
ATOM   2936  CA  LYS B 402      73.328  87.263   0.085  1.00 83.07           C  
ATOM   2937  C   LYS B 402      73.272  85.805  -0.379  1.00 83.07           C  
ATOM   2938  O   LYS B 402      72.233  85.185  -0.297  1.00 83.07           O  
ATOM   2939  CB  LYS B 402      72.417  87.484   1.299  1.00 83.07           C  
ATOM   2940  CG  LYS B 402      72.400  88.913   1.850  1.00 83.07           C  
ATOM   2941  CD  LYS B 402      71.040  89.574   1.613  1.00 83.07           C  
ATOM   2942  CE  LYS B 402      70.012  89.216   2.700  1.00 83.07           C  
ATOM   2943  NZ  LYS B 402      69.841  90.290   3.722  1.00 83.07           N1+
ATOM   2944  N   ALA B 403      74.394  85.264  -0.849  1.00 83.07           N  
ATOM   2945  CA  ALA B 403      74.445  83.902  -1.380  1.00 83.07           C  
ATOM   2946  C   ALA B 403      74.354  82.851  -0.324  1.00 83.07           C  
ATOM   2947  O   ALA B 403      73.628  82.993   0.635  1.00 83.07           O  
ATOM   2948  CB  ALA B 403      75.695  83.694  -2.172  1.00 83.07           C  
ATOM   2949  N   PHE B 404      75.104  81.785  -0.523  1.00 83.07           N  
ATOM   2950  CA  PHE B 404      75.151  80.665   0.392  1.00 83.07           C  
ATOM   2951  C   PHE B 404      75.296  81.050   1.868  1.00 83.07           C  
ATOM   2952  O   PHE B 404      75.537  80.193   2.726  1.00 83.07           O  
ATOM   2953  CB  PHE B 404      76.341  79.814   0.017  1.00 83.07           C  
ATOM   2954  CG  PHE B 404      76.187  79.083  -1.277  1.00 83.07           C  
ATOM   2955  CD1 PHE B 404      75.967  79.759  -2.466  1.00 83.07           C  
ATOM   2956  CD2 PHE B 404      76.294  77.696  -1.309  1.00 83.07           C  
ATOM   2957  CE1 PHE B 404      75.841  79.055  -3.666  1.00 83.07           C  
ATOM   2958  CE2 PHE B 404      76.171  76.984  -2.510  1.00 83.07           C  
ATOM   2959  CZ  PHE B 404      75.945  77.666  -3.687  1.00 83.07           C  
ATOM   2960  N   LEU B 405      75.135  82.336   2.151  1.00 83.07           N  
ATOM   2961  CA  LEU B 405      75.284  82.908   3.489  1.00 83.07           C  
ATOM   2962  C   LEU B 405      74.552  82.209   4.630  1.00 83.07           C  
ATOM   2963  O   LEU B 405      75.097  82.072   5.717  1.00 83.07           O  
ATOM   2964  CB  LEU B 405      74.896  84.385   3.446  1.00 83.07           C  
ATOM   2965  CG  LEU B 405      74.659  85.117   4.759  1.00 83.07           C  
ATOM   2966  CD1 LEU B 405      75.796  86.084   5.006  1.00 83.07           C  
ATOM   2967  CD2 LEU B 405      73.302  85.822   4.730  1.00 83.07           C  
ATOM   2968  N   HIS B 406      73.328  81.763   4.385  1.00 83.07           N  
ATOM   2969  CA  HIS B 406      72.550  81.095   5.410  1.00 83.07           C  
ATOM   2970  C   HIS B 406      73.272  79.921   6.071  1.00 83.07           C  
ATOM   2971  O   HIS B 406      72.834  79.454   7.106  1.00 83.07           O  
ATOM   2972  CB  HIS B 406      71.212  80.654   4.839  1.00 83.07           C  
ATOM   2973  CG  HIS B 406      71.220  79.271   4.267  1.00 83.07           C  
ATOM   2974  CD2 HIS B 406      70.410  78.209   4.494  1.00 83.07           C  
ATOM   2975  ND1 HIS B 406      72.134  78.857   3.326  1.00 83.07           N  
ATOM   2976  CE1 HIS B 406      71.895  77.599   3.001  1.00 83.07           C  
ATOM   2977  NE2 HIS B 406      70.854  77.181   3.697  1.00 83.07           N  
ATOM   2978  N   TRP B 407      74.366  79.444   5.480  1.00 83.07           N  
ATOM   2979  CA  TRP B 407      75.140  78.355   6.068  1.00 83.07           C  
ATOM   2980  C   TRP B 407      75.896  78.835   7.279  1.00 83.07           C  
ATOM   2981  O   TRP B 407      76.214  78.044   8.147  1.00 83.07           O  
ATOM   2982  CB  TRP B 407      76.144  77.777   5.081  1.00 83.07           C  
ATOM   2983  CG  TRP B 407      75.585  76.773   4.154  1.00 83.07           C  
ATOM   2984  CD1 TRP B 407      75.772  76.724   2.817  1.00 83.07           C  
ATOM   2985  CD2 TRP B 407      74.759  75.656   4.485  1.00 83.07           C  
ATOM   2986  CE2 TRP B 407      74.472  74.977   3.288  1.00 83.07           C  
ATOM   2987  CE3 TRP B 407      74.227  75.157   5.674  1.00 83.07           C  
ATOM   2988  NE1 TRP B 407      75.105  75.652   2.283  1.00 83.07           N  
ATOM   2989  CZ2 TRP B 407      73.673  73.830   3.240  1.00 83.07           C  
ATOM   2990  CZ3 TRP B 407      73.425  74.016   5.626  1.00 83.07           C  
ATOM   2991  CH2 TRP B 407      73.156  73.368   4.414  1.00 83.07           C  
ATOM   2992  N   TYR B 408      76.196  80.129   7.311  1.00 83.07           N  
ATOM   2993  CA  TYR B 408      76.897  80.750   8.424  1.00 83.07           C  
ATOM   2994  C   TYR B 408      75.904  81.356   9.411  1.00 83.07           C  
ATOM   2995  O   TYR B 408      75.962  81.063  10.598  1.00 83.07           O  
ATOM   2996  CB  TYR B 408      77.880  81.810   7.935  1.00 83.07           C  
ATOM   2997  CG  TYR B 408      78.858  81.326   6.888  1.00 83.07           C  
ATOM   2998  CD1 TYR B 408      78.525  81.358   5.550  1.00 83.07           C  
ATOM   2999  CD2 TYR B 408      80.125  80.855   7.236  1.00 83.07           C  
ATOM   3000  CE1 TYR B 408      79.405  80.928   4.580  1.00 83.07           C  
ATOM   3001  CE2 TYR B 408      81.017  80.416   6.265  1.00 83.07           C  
ATOM   3002  CZ  TYR B 408      80.637  80.460   4.935  1.00 83.07           C  
ATOM   3003  OH  TYR B 408      81.465  80.038   3.930  1.00 83.07           O  
ATOM   3004  N   THR B 409      75.000  82.205   8.928  1.00 83.07           N  
ATOM   3005  CA  THR B 409      73.954  82.777   9.769  1.00 83.07           C  
ATOM   3006  C   THR B 409      73.570  81.711  10.778  1.00 83.07           C  
ATOM   3007  O   THR B 409      73.485  81.967  11.973  1.00 83.07           O  
ATOM   3008  CB  THR B 409      72.695  83.082   8.920  1.00 83.07           C  
ATOM   3009  CG2 THR B 409      71.559  83.719   9.769  1.00 83.07           C  
ATOM   3010  OG1 THR B 409      72.993  84.065   7.923  1.00 83.07           O  
ATOM   3011  N   GLY B 410      73.348  80.507  10.261  1.00 83.07           N  
ATOM   3012  CA  GLY B 410      72.922  79.363  11.036  1.00 83.07           C  
ATOM   3013  C   GLY B 410      73.855  78.909  12.124  1.00 83.07           C  
ATOM   3014  O   GLY B 410      73.382  78.515  13.178  1.00 83.07           O  
ATOM   3015  N   GLU B 411      75.161  78.948  11.885  1.00 83.07           N  
ATOM   3016  CA  GLU B 411      76.114  78.524  12.910  1.00 83.07           C  
ATOM   3017  C   GLU B 411      76.368  79.585  13.990  1.00 83.07           C  
ATOM   3018  O   GLU B 411      77.212  79.394  14.873  1.00 83.07           O  
ATOM   3019  CB  GLU B 411      77.422  77.993  12.310  1.00 83.07           C  
ATOM   3020  CG  GLU B 411      77.321  76.604  11.678  1.00 83.07           C  
ATOM   3021  CD  GLU B 411      77.014  75.491  12.668  1.00 83.07           C  
ATOM   3022  OE1 GLU B 411      77.939  75.009  13.357  1.00 83.07           O  
ATOM   3023  OE2 GLU B 411      75.840  75.085  12.751  1.00 83.07           O1-
ATOM   3024  N   GLY B 412      75.640  80.699  13.907  1.00 83.07           N  
ATOM   3025  CA  GLY B 412      75.683  81.733  14.930  1.00 83.07           C  
ATOM   3026  C   GLY B 412      76.189  83.113  14.581  1.00 83.07           C  
ATOM   3027  O   GLY B 412      76.095  84.024  15.393  1.00 83.07           O  
ATOM   3028  N   MET B 413      76.704  83.279  13.375  1.00 83.07           N  
ATOM   3029  CA  MET B 413      77.301  84.540  12.964  1.00 83.07           C  
ATOM   3030  C   MET B 413      76.299  85.611  12.619  1.00 83.07           C  
ATOM   3031  O   MET B 413      75.160  85.306  12.273  1.00 83.07           O  
ATOM   3032  CB  MET B 413      78.161  84.300  11.735  1.00 83.07           C  
ATOM   3033  CG  MET B 413      79.568  83.858  12.034  1.00 83.07           C  
ATOM   3034  SD  MET B 413      80.480  83.660  10.523  1.00 83.07           S  
ATOM   3035  CE  MET B 413      80.891  85.369  10.154  1.00 83.07           C  
ATOM   3036  N   ASP B 414      76.732  86.867  12.687  1.00 83.07           N  
ATOM   3037  CA  ASP B 414      75.852  87.958  12.291  1.00 83.07           C  
ATOM   3038  C   ASP B 414      76.097  88.458  10.877  1.00 83.07           C  
ATOM   3039  O   ASP B 414      77.223  88.445  10.377  1.00 83.07           O  
ATOM   3040  CB  ASP B 414      75.855  89.127  13.273  1.00 83.07           C  
ATOM   3041  CG  ASP B 414      74.469  89.791  13.379  1.00 83.07           C  
ATOM   3042  OD1 ASP B 414      73.885  90.175  12.330  1.00 83.07           O  
ATOM   3043  OD2 ASP B 414      73.872  89.948  14.470  1.00 83.07           O1-
ATOM   3044  N   GLU B 415      75.008  88.905  10.254  1.00 83.07           N  
ATOM   3045  CA  GLU B 415      75.023  89.419   8.892  1.00 83.07           C  
ATOM   3046  C   GLU B 415      76.085  90.486   8.693  1.00 83.07           C  
ATOM   3047  O   GLU B 415      76.791  90.455   7.696  1.00 83.07           O  
ATOM   3048  CB  GLU B 415      73.647  89.975   8.499  1.00 83.07           C  
ATOM   3049  CG  GLU B 415      73.623  90.639   7.127  1.00 83.07           C  
ATOM   3050  CD  GLU B 415      72.742  89.908   6.138  1.00 83.07           C  
ATOM   3051  OE1 GLU B 415      73.098  89.850   4.936  1.00 83.07           O  
ATOM   3052  OE2 GLU B 415      71.682  89.401   6.563  1.00 83.07           O1-
ATOM   3053  N   MET B 416      76.203  91.410   9.647  1.00 83.07           N  
ATOM   3054  CA  MET B 416      77.139  92.540   9.539  1.00 83.07           C  
ATOM   3055  C   MET B 416      78.596  92.224   9.852  1.00 83.07           C  
ATOM   3056  O   MET B 416      79.452  93.084   9.702  1.00 83.07           O  
ATOM   3057  CB  MET B 416      76.656  93.738  10.363  1.00 83.07           C  
ATOM   3058  CG  MET B 416      75.936  93.349  11.647  1.00 83.07           C  
ATOM   3059  SD  MET B 416      76.884  93.677  13.188  1.00 83.07           S  
ATOM   3060  CE  MET B 416      78.587  92.839  12.924  1.00 83.07           C  
ATOM   3061  N   GLU B 417      78.864  91.003  10.301  1.00 83.07           N  
ATOM   3062  CA  GLU B 417      80.232  90.558  10.547  1.00 83.07           C  
ATOM   3063  C   GLU B 417      80.889  90.235   9.200  1.00 83.07           C  
ATOM   3064  O   GLU B 417      82.105  90.068   9.102  1.00 83.07           O  
ATOM   3065  CB  GLU B 417      80.251  89.336  11.467  1.00 83.07           C  
ATOM   3066  CG  GLU B 417      81.622  88.993  12.038  1.00 83.07           C  
ATOM   3067  CD  GLU B 417      81.629  87.713  12.859  1.00 83.07           C  
ATOM   3068  OE1 GLU B 417      80.728  87.528  13.711  1.00 83.07           O  
ATOM   3069  OE2 GLU B 417      82.553  86.895  12.658  1.00 83.07           O1-
ATOM   3070  N   PHE B 418      80.055  90.128   8.171  1.00 83.07           N  
ATOM   3071  CA  PHE B 418      80.515  89.904   6.816  1.00 83.07           C  
ATOM   3072  C   PHE B 418      80.869  91.280   6.285  1.00 83.07           C  
ATOM   3073  O   PHE B 418      81.998  91.473   5.868  1.00 83.07           O  
ATOM   3074  CB  PHE B 418      79.452  89.231   5.944  1.00 83.07           C  
ATOM   3075  CG  PHE B 418      79.561  87.726   5.880  1.00 83.07           C  
ATOM   3076  CD1 PHE B 418      79.338  86.937   7.004  1.00 83.07           C  
ATOM   3077  CD2 PHE B 418      79.857  87.099   4.689  1.00 83.07           C  
ATOM   3078  CE1 PHE B 418      79.429  85.549   6.940  1.00 83.07           C  
ATOM   3079  CE2 PHE B 418      79.954  85.718   4.620  1.00 83.07           C  
ATOM   3080  CZ  PHE B 418      79.738  84.943   5.749  1.00 83.07           C  
ATOM   3081  N   THR B 419      79.943  92.248   6.333  1.00 83.07           N  
ATOM   3082  CA  THR B 419      80.245  93.612   5.848  1.00 83.07           C  
ATOM   3083  C   THR B 419      81.487  94.199   6.560  1.00 83.07           C  
ATOM   3084  O   THR B 419      82.337  94.851   5.937  1.00 83.07           O  
ATOM   3085  CB  THR B 419      79.023  94.596   5.925  1.00 83.07           C  
ATOM   3086  CG2 THR B 419      78.264  94.653   4.599  1.00 83.07           C  
ATOM   3087  OG1 THR B 419      78.045  94.117   6.847  1.00 83.07           O  
ATOM   3088  N   GLU B 420      81.599  93.926   7.855  1.00 83.07           N  
ATOM   3089  CA  GLU B 420      82.721  94.393   8.656  1.00 83.07           C  
ATOM   3090  C   GLU B 420      84.044  93.816   8.199  1.00 83.07           C  
ATOM   3091  O   GLU B 420      85.096  94.420   8.409  1.00 83.07           O  
ATOM   3092  CB  GLU B 420      82.517  93.985  10.096  1.00 83.07           C  
ATOM   3093  CG  GLU B 420      82.473  95.133  11.085  1.00 83.07           C  
ATOM   3094  CD  GLU B 420      82.314  94.627  12.513  1.00 83.07           C  
ATOM   3095  OE1 GLU B 420      81.151  94.602  13.028  1.00 83.07           O  
ATOM   3096  OE2 GLU B 420      83.362  94.236  13.102  1.00 83.07           O1-
ATOM   3097  N   ALA B 421      83.999  92.627   7.611  1.00 83.07           N  
ATOM   3098  CA  ALA B 421      85.212  91.999   7.094  1.00 83.07           C  
ATOM   3099  C   ALA B 421      85.517  92.532   5.706  1.00 83.07           C  
ATOM   3100  O   ALA B 421      86.642  92.904   5.419  1.00 83.07           O  
ATOM   3101  CB  ALA B 421      85.082  90.496   7.069  1.00 83.07           C  
ATOM   3102  N   GLU B 422      84.496  92.574   4.860  1.00 83.07           N  
ATOM   3103  CA  GLU B 422      84.612  93.099   3.508  1.00 83.07           C  
ATOM   3104  C   GLU B 422      85.182  94.518   3.558  1.00 83.07           C  
ATOM   3105  O   GLU B 422      86.125  94.840   2.819  1.00 83.07           O  
ATOM   3106  CB  GLU B 422      83.238  93.098   2.831  1.00 83.07           C  
ATOM   3107  CG  GLU B 422      83.232  93.353   1.330  1.00 83.07           C  
ATOM   3108  CD  GLU B 422      81.867  93.801   0.832  1.00 83.07           C  
ATOM   3109  OE1 GLU B 422      81.421  94.893   1.228  1.00 83.07           O  
ATOM   3110  OE2 GLU B 422      81.226  93.065   0.056  1.00 83.07           O1-
ATOM   3111  N   SER B 423      84.617  95.344   4.446  1.00 83.07           N  
ATOM   3112  CA  SER B 423      85.047  96.731   4.621  1.00 83.07           C  
ATOM   3113  C   SER B 423      86.503  96.858   5.031  1.00 83.07           C  
ATOM   3114  O   SER B 423      87.235  97.678   4.471  1.00 83.07           O  
ATOM   3115  CB  SER B 423      84.179  97.446   5.636  1.00 83.07           C  
ATOM   3116  OG  SER B 423      83.485  98.471   4.976  1.00 83.07           O  
ATOM   3117  N   ASN B 424      86.920  96.058   6.009  1.00 83.07           N  
ATOM   3118  CA  ASN B 424      88.313  96.077   6.438  1.00 83.07           C  
ATOM   3119  C   ASN B 424      89.248  95.724   5.272  1.00 83.07           C  
ATOM   3120  O   ASN B 424      90.280  96.377   5.063  1.00 83.07           O  
ATOM   3121  CB  ASN B 424      88.553  95.125   7.635  1.00 83.07           C  
ATOM   3122  CG  ASN B 424      89.980  95.281   8.260  1.00 83.07           C  
ATOM   3123  ND2 ASN B 424      90.037  95.756   9.514  1.00 83.07           N  
ATOM   3124  OD1 ASN B 424      90.999  94.977   7.618  1.00 83.07           O  
ATOM   3125  N   MET B 425      88.854  94.709   4.507  1.00 83.07           N  
ATOM   3126  CA  MET B 425      89.655  94.182   3.411  1.00 83.07           C  
ATOM   3127  C   MET B 425      89.906  95.119   2.239  1.00 83.07           C  
ATOM   3128  O   MET B 425      91.016  95.153   1.705  1.00 83.07           O  
ATOM   3129  CB  MET B 425      89.000  92.926   2.901  1.00 83.07           C  
ATOM   3130  CG  MET B 425      89.964  91.823   2.712  1.00 83.07           C  
ATOM   3131  SD  MET B 425      89.647  91.037   1.155  1.00 83.07           S  
ATOM   3132  CE  MET B 425      91.240  90.436   0.839  1.00 83.07           C  
ATOM   3133  N   ASN B 426      88.862  95.846   1.831  1.00 83.07           N  
ATOM   3134  CA  ASN B 426      88.945  96.805   0.718  1.00 83.07           C  
ATOM   3135  C   ASN B 426      89.851  97.981   1.056  1.00 83.07           C  
ATOM   3136  O   ASN B 426      90.435  98.599   0.164  1.00 83.07           O  
ATOM   3137  CB  ASN B 426      87.553  97.301   0.300  1.00 83.07           C  
ATOM   3138  CG  ASN B 426      86.725  96.221  -0.366  1.00 83.07           C  
ATOM   3139  ND2 ASN B 426      85.451  96.502  -0.576  1.00 83.07           N  
ATOM   3140  OD1 ASN B 426      87.225  95.146  -0.688  1.00 83.07           O  
ATOM   3141  N   ASP B 427      89.943  98.284   2.351  1.00 83.07           N  
ATOM   3142  CA  ASP B 427      90.813  99.334   2.842  1.00 83.07           C  
ATOM   3143  C   ASP B 427      92.219  98.890   2.566  1.00 83.07           C  
ATOM   3144  O   ASP B 427      93.027  99.687   2.083  1.00 83.07           O  
ATOM   3145  CB  ASP B 427      90.660  99.511   4.341  1.00 83.07           C  
ATOM   3146  CG  ASP B 427      89.388 100.179   4.706  1.00 83.07           C  
ATOM   3147  OD1 ASP B 427      89.038 100.147   5.901  1.00 83.07           O  
ATOM   3148  OD2 ASP B 427      88.672 100.761   3.864  1.00 83.07           O1-
ATOM   3149  N   LEU B 428      92.495  97.614   2.868  1.00 83.07           N  
ATOM   3150  CA  LEU B 428      93.812  97.024   2.654  1.00 83.07           C  
ATOM   3151  C   LEU B 428      94.276  97.213   1.211  1.00 83.07           C  
ATOM   3152  O   LEU B 428      95.470  97.353   0.946  1.00 83.07           O  
ATOM   3153  CB  LEU B 428      93.806  95.549   3.014  1.00 83.07           C  
ATOM   3154  CG  LEU B 428      95.187  94.898   2.957  1.00 83.07           C  
ATOM   3155  CD1 LEU B 428      96.069  95.482   4.050  1.00 83.07           C  
ATOM   3156  CD2 LEU B 428      95.091  93.381   3.090  1.00 83.07           C  
ATOM   3157  N   VAL B 429      93.315  97.217   0.291  1.00 83.07           N  
ATOM   3158  CA  VAL B 429      93.572  97.446  -1.120  1.00 83.07           C  
ATOM   3159  C   VAL B 429      93.788  98.942  -1.288  1.00 83.07           C  
ATOM   3160  O   VAL B 429      94.728  99.366  -1.946  1.00 83.07           O  
ATOM   3161  CB  VAL B 429      92.384  96.958  -1.966  1.00 83.07           C  
ATOM   3162  CG1 VAL B 429      92.255  97.750  -3.257  1.00 83.07           C  
ATOM   3163  CG2 VAL B 429      92.513  95.467  -2.243  1.00 83.07           C  
ATOM   3164  N   SER B 430      92.936  99.727  -0.633  1.00 83.07           N  
ATOM   3165  CA  SER B 430      92.969 101.188  -0.701  1.00 83.07           C  
ATOM   3166  C   SER B 430      94.143 101.805   0.029  1.00 83.07           C  
ATOM   3167  O   SER B 430      94.284 103.024   0.057  1.00 83.07           O  
ATOM   3168  CB  SER B 430      91.662 101.769  -0.149  1.00 83.07           C  
ATOM   3169  OG  SER B 430      90.766 102.129  -1.197  1.00 83.07           O  
ATOM   3170  N   GLU B 431      94.967 100.957   0.629  1.00 83.07           N  
ATOM   3171  CA  GLU B 431      96.158 101.399   1.338  1.00 83.07           C  
ATOM   3172  C   GLU B 431      97.366 101.031   0.515  1.00 83.07           C  
ATOM   3173  O   GLU B 431      98.263 101.837   0.352  1.00 83.07           O  
ATOM   3174  CB  GLU B 431      96.243 100.767   2.721  1.00 83.07           C  
ATOM   3175  CG  GLU B 431      95.094 101.155   3.654  1.00 83.07           C  
ATOM   3176  CD  GLU B 431      95.116 100.375   4.966  1.00 83.07           C  
ATOM   3177  OE1 GLU B 431      96.190 100.386   5.629  1.00 83.07           O  
ATOM   3178  OE2 GLU B 431      94.080  99.755   5.336  1.00 83.07           O1-
ATOM   3179  N   TYR B 432      97.374  99.806  -0.002  1.00 83.07           N  
ATOM   3180  CA  TYR B 432      98.438  99.328  -0.871  1.00 83.07           C  
ATOM   3181  C   TYR B 432      98.469 100.199  -2.112  1.00 83.07           C  
ATOM   3182  O   TYR B 432      99.543 100.486  -2.659  1.00 83.07           O  
ATOM   3183  CB  TYR B 432      98.164  97.900  -1.318  1.00 83.07           C  
ATOM   3184  CG  TYR B 432      98.779  96.806  -0.472  1.00 83.07           C  
ATOM   3185  CD1 TYR B 432      97.998  95.744  -0.004  1.00 83.07           C  
ATOM   3186  CD2 TYR B 432     100.127  96.803  -0.164  1.00 83.07           C  
ATOM   3187  CE1 TYR B 432      98.539  94.724   0.757  1.00 83.07           C  
ATOM   3188  CE2 TYR B 432     100.675  95.784   0.590  1.00 83.07           C  
ATOM   3189  CZ  TYR B 432      99.874  94.752   1.044  1.00 83.07           C  
ATOM   3190  OH  TYR B 432     100.406  93.741   1.790  1.00 83.07           O  
ATOM   3191  N   GLN B 433      97.278 100.612  -2.553  1.00 83.07           N  
ATOM   3192  CA  GLN B 433      97.126 101.465  -3.738  1.00 83.07           C  
ATOM   3193  C   GLN B 433      97.490 102.924  -3.413  1.00 83.07           C  
ATOM   3194  O   GLN B 433      97.697 103.759  -4.317  1.00 83.07           O  
ATOM   3195  CB  GLN B 433      95.719 101.321  -4.358  1.00 83.07           C  
ATOM   3196  CG  GLN B 433      95.383 102.300  -5.492  1.00 83.07           C  
ATOM   3197  CD  GLN B 433      95.960 101.910  -6.854  1.00 83.07           C  
ATOM   3198  NE2 GLN B 433      95.082 101.736  -7.825  1.00 83.07           N  
ATOM   3199  OE1 GLN B 433      97.173 101.798  -7.030  1.00 83.07           O  
ATOM   3200  N   GLN B 434      97.595 103.210  -2.116  1.00 83.07           N  
ATOM   3201  CA  GLN B 434      97.959 104.538  -1.638  1.00 83.07           C  
ATOM   3202  C   GLN B 434      99.462 104.704  -1.665  1.00 83.07           C  
ATOM   3203  O   GLN B 434      99.969 105.814  -1.799  1.00 83.07           O  
ATOM   3204  CB  GLN B 434      97.493 104.713  -0.201  1.00 83.07           C  
ATOM   3205  CG  GLN B 434      96.215 105.517  -0.004  1.00 83.07           C  
ATOM   3206  CD  GLN B 434      95.904 105.656   1.479  1.00 83.07           C  
ATOM   3207  NE2 GLN B 434      94.925 104.884   1.975  1.00 83.07           N  
ATOM   3208  OE1 GLN B 434      96.575 106.428   2.176  1.00 83.07           O  
ATOM   3209  N   TYR B 435     100.170 103.589  -1.529  1.00 83.07           N  
ATOM   3210  CA  TYR B 435     101.617 103.634  -1.468  1.00 83.07           C  
ATOM   3211  C   TYR B 435     102.283 103.399  -2.798  1.00 83.07           C  
ATOM   3212  O   TYR B 435     103.399 102.919  -2.855  1.00 83.07           O  
ATOM   3213  CB  TYR B 435     102.208 102.747  -0.351  1.00 83.07           C  
ATOM   3214  CG  TYR B 435     102.050 103.320   1.052  1.00 83.07           C  
ATOM   3215  CD1 TYR B 435     101.445 102.583   2.066  1.00 83.07           C  
ATOM   3216  CD2 TYR B 435     102.492 104.595   1.356  1.00 83.07           C  
ATOM   3217  CE1 TYR B 435     101.287 103.105   3.333  1.00 83.07           C  
ATOM   3218  CE2 TYR B 435     102.332 105.123   2.621  1.00 83.07           C  
ATOM   3219  CZ  TYR B 435     101.733 104.374   3.601  1.00 83.07           C  
ATOM   3220  OH  TYR B 435     101.583 104.911   4.850  1.00 83.07           O  
ATOM   3221  N   GLN B 436     101.601 103.713  -3.880  1.00 83.07           N  
ATOM   3222  CA  GLN B 436     102.310 103.749  -5.139  1.00 83.07           C  
ATOM   3223  C   GLN B 436     102.388 105.265  -5.385  1.00 83.07           C  
ATOM   3224  O   GLN B 436     101.879 105.800  -6.386  1.00 83.07           O  
ATOM   3225  CB  GLN B 436     101.570 102.965  -6.193  1.00 83.07           C  
ATOM   3226  CG  GLN B 436     101.613 101.481  -5.914  1.00 83.07           C  
ATOM   3227  CD  GLN B 436     100.747 100.671  -6.864  1.00 83.07           C  
ATOM   3228  NE2 GLN B 436     100.756  99.361  -6.685  1.00 83.07           N  
ATOM   3229  OE1 GLN B 436     100.075 101.218  -7.745  1.00 83.07           O  
ATOM   3230  N   ASP B 437     103.023 105.929  -4.405  1.00 83.07           N  
ATOM   3231  CA  ASP B 437     103.146 107.390  -4.290  1.00 83.07           C  
ATOM   3232  C   ASP B 437     104.416 107.972  -4.900  1.00 83.07           C  
ATOM   3233  O   ASP B 437     104.603 107.851  -6.106  1.00 83.07           O  
ATOM   3234  CB  ASP B 437     103.002 107.825  -2.831  1.00 83.07           C  
ATOM   3235  N   ALA B 438     105.261 108.629  -4.092  1.00 83.07           N  
ATOM   3236  CA  ALA B 438     106.513 109.250  -4.580  1.00 83.07           C  
ATOM   3237  C   ALA B 438     107.402 109.774  -3.450  1.00 83.07           C  
ATOM   3238  O   ALA B 438     108.286 110.612  -3.672  1.00 83.07           O  
ATOM   3239  CB  ALA B 438     106.224 110.379  -5.608  1.00 83.07           C  
TER    3240      ALA B 438 
HETATM 3241 MG    MG B 502      88.480  69.716   3.215  1.00 83.07          MG  
HETATM 3242  PA  GDP B 602      91.013  72.260   3.050  1.00 83.07           P  
HETATM 3243  PB  GDP B 602      90.219  72.393   5.784  1.00 83.07           P  
HETATM 3244  C5' GDP B 602      90.524  74.225   1.367  1.00 83.07           C  
HETATM 3245  O5' GDP B 602      91.428  73.613   2.260  1.00 83.07           O  
HETATM 3246  C4' GDP B 602      91.266  74.901   0.227  1.00 83.07           C  
HETATM 3247  O4' GDP B 602      92.638  74.665   0.368  1.00 83.07           O  
HETATM 3248  C3' GDP B 602      90.863  74.319  -1.116  1.00 83.07           C  
HETATM 3249  O3' GDP B 602      90.133  75.277  -1.834  1.00 83.07           O  
HETATM 3250  C2' GDP B 602      92.143  73.968  -1.846  1.00 83.07           C  
HETATM 3251  O2' GDP B 602      92.410  74.723  -3.006  1.00 83.07           O  
HETATM 3252  C1' GDP B 602      93.224  74.246  -0.843  1.00 83.07           C  
HETATM 3253  N1  GDP B 602      97.783  71.787  -1.164  1.00 83.07           N  
HETATM 3254  O1A GDP B 602      92.225  71.680   3.667  1.00 83.07           O1-
HETATM 3255  O1B GDP B 602      90.122  73.715   6.442  1.00 83.07           O  
HETATM 3256  C2  GDP B 602      97.508  73.106  -1.444  1.00 83.07           C  
HETATM 3257  N2  GDP B 602      98.245  73.701  -2.358  1.00 83.07           N  
HETATM 3258  O2A GDP B 602      90.259  71.247   2.140  1.00 83.07           O  
HETATM 3259  O2B GDP B 602      91.576  71.744   6.068  1.00 83.07           O1-
HETATM 3260  N3  GDP B 602      96.230  73.583  -1.292  1.00 83.07           N  
HETATM 3261  O3A GDP B 602      90.063  72.787   4.238  1.00 83.07           O  
HETATM 3262  O3B GDP B 602      89.127  71.379   6.180  1.00 83.07           O  
HETATM 3263  C4  GDP B 602      95.233  72.765  -0.884  1.00 83.07           C  
HETATM 3264  C5  GDP B 602      95.485  71.441  -0.597  1.00 83.07           C  
HETATM 3265  C6  GDP B 602      96.772  70.952  -0.743  1.00 83.07           C  
HETATM 3266  O6  GDP B 602      96.953  69.743  -0.715  1.00 83.07           O  
HETATM 3267  N7  GDP B 602      94.320  70.871  -0.216  1.00 83.07           N  
HETATM 3268  C8  GDP B 602      93.340  71.798  -0.248  1.00 83.07           C  
HETATM 3269  N9  GDP B 602      93.904  72.972  -0.657  1.00 83.07           N  
TER
HETATM    1  N   UNK           114.877  94.861   3.570  0.00  0.00           N  
HETATM    2  C   UNK           116.509  87.093   6.458  0.00  0.00           C  
HETATM    3  C   UNK           116.474  87.112   5.044  0.00  0.00           C  
HETATM    4  C   UNK           116.817  88.306   4.358  0.00  0.00           C  
HETATM    5  C   UNK           117.103  89.473   5.089  0.00  0.00           C  
HETATM    6  C   UNK           117.055  89.489   6.503  0.00  0.00           C  
HETATM    7  C   UNK           116.788  88.274   7.174  0.00  0.00           C  
HETATM    8  C   UNK           114.992  85.537   7.363  0.00  0.00           C  
HETATM    9  C   UNK           114.896  86.059   3.663  0.00  0.00           C  
HETATM   10  C   UNK           117.709  87.457   2.332  0.00  0.00           C  
HETATM   11  C   UNK           117.301  90.725   7.318  0.00  0.00           C  
HETATM   12  C   UNK           117.340  92.072   6.674  0.00  0.00           C  
HETATM   13  C   UNK           118.437  92.977   7.197  0.00  0.00           C  
HETATM   14  C   UNK           116.418  92.402   5.737  0.00  0.00           C  
HETATM   15  C   UNK           116.127  93.628   4.952  0.00  0.00           C  
HETATM   16  C   UNK           115.118  93.585   4.029  0.00  0.00           C  
HETATM   17  C   UNK           115.741  95.759   4.156  0.00  0.00           C  
HETATM   18  C   UNK           116.644  94.990   4.958  0.00  0.00           C  
HETATM   19  C   UNK           115.802  97.162   4.071  0.00  0.00           C  
HETATM   20  C   UNK           116.834  97.868   4.727  0.00  0.00           C  
HETATM   21  C   UNK           117.798  97.130   5.434  0.00  0.00           C  
HETATM   22  C   UNK           117.708  95.729   5.540  0.00  0.00           C  
HETATM   23  C   UNK           116.006 100.005   4.010  0.00  0.00           C  
HETATM   24  O   UNK           116.340  85.926   7.156  0.00  0.00           O  
HETATM   25  O   UNK           116.123  85.965   4.374  0.00  0.00           O  
HETATM   26  O   UNK           116.880  88.402   2.991  0.00  0.00           O  
HETATM   27  O   UNK           117.449  90.633   8.538  0.00  0.00           O  
HETATM   28  O   UNK           116.976  99.239   4.711  0.00  0.00           O  
HETATM   29  H   UNK           117.371  90.354   4.525  0.00  0.00           H  
HETATM   30  H   UNK           116.790  88.231   8.253  0.00  0.00           H  
HETATM   31  H   UNK           114.968  84.517   7.748  0.00  0.00           H  
HETATM   32  H   UNK           114.516  86.179   8.103  0.00  0.00           H  
HETATM   33  H   UNK           114.404  85.557   6.448  0.00  0.00           H  
HETATM   34  H   UNK           114.955  86.737   2.813  0.00  0.00           H  
HETATM   35  H   UNK           114.618  85.075   3.284  0.00  0.00           H  
HETATM   36  H   UNK           114.095  86.402   4.320  0.00  0.00           H  
HETATM   37  H   UNK           118.563  87.983   1.907  0.00  0.00           H  
HETATM   38  H   UNK           117.148  86.988   1.524  0.00  0.00           H  
HETATM   39  H   UNK           118.108  86.673   2.975  0.00  0.00           H  
HETATM   40  H   UNK           117.984  93.847   7.674  0.00  0.00           H  
HETATM   41  H   UNK           119.065  92.498   7.953  0.00  0.00           H  
HETATM   42  H   UNK           119.099  93.269   6.382  0.00  0.00           H  
HETATM   43  H   UNK           115.698  91.628   5.508  0.00  0.00           H  
HETATM   44  H   UNK           114.505  92.756   3.706  0.00  0.00           H  
HETATM   45  H   UNK           114.124  95.079   2.934  0.00  0.00           H  
HETATM   46  H   UNK           115.042  97.675   3.507  0.00  0.00           H  
HETATM   47  H   UNK           118.599  97.654   5.934  0.00  0.00           H  
HETATM   48  H   UNK           118.464  95.251   6.128  0.00  0.00           H  
HETATM   49  H   UNK           116.254 101.063   4.093  0.00  0.00           H  
HETATM   50  H   UNK           115.986  99.757   2.949  0.00  0.00           H  
HETATM   51  H   UNK           115.008  99.865   4.429  0.00  0.00           H  
TER
END
